# Supplementary material for: Low-resolution Australasian palaeoclimate records of the last 2000 years
Source: Copernicus journal article supplement (doi:10.5194/cp-2017-31), 2017-03-17

**Table S1. All records identified within Australasia that span the Common Era. State refers to the political state, country, or geographic region where the record originates: NSW=New South Wales, VIC=Victoria, SA=South Australia, WA=Western Australia, NT=Northern Territory, QLD=Queensland, TAS=Tasmania, ACT=Australian Capitol Territory, TS=Torres Strait, INDO=Indonesia, NZ=New Zealand, PNG=Papua New Guinea, Pacific= Pacific Ocean Islands, ANT= Antarctica, BS=Bass Strait; Elevation is in meters above sea level; Resolution refers to average number of samples per year, where indicated by the original authors or calculated from the published text.**

| Record Name             | State | Latitude | Longitude | Elevation | Classification | Oldest Year       | Youngest Year   | Resolution | Reference              |
|-------------------------|-------|----------|-----------|-----------|----------------|-------------------|-----------------|------------|------------------------|
| Richmond River          | QLD   | -28.48   | 152.97    | 100       | LakeWetland    | 5451YBP(+/-133)   | -57YBP(+/-1)    | NA         | Logan et al., 2011     |
| Theresa/Capella Creek   | QLD   | -23.00   | 148.04    | Various   | LakeWetland    | 791YBP(+/-69)     | -48YBP          | 10         | Hughes et al., 2009    |
| Mill Creek              | NSW   | -33.39   | 151.04    | 4         | LakeWetland    | 10458YBP(+/-215)  | -40YBP          | NA         | Dodson and Thom, 1992  |
| Mill Creek              | NSW   | -33.39   | 151.04    | 4         | LakeWetland    | 684YBP(+/-106)    | -43YBP(+/-0)    | 7          | Johnson, 2000          |
| Yarlington Tier         | TAS   | -42.52   | 147.29    | 650       | LakeWetland    | 10174YBP(+/-395)  | NA              | NA         | Harle et al., 1993     |
| Rooty Breaks Swamp      | VIC   | -37.21   | 148.86    | 1100      | LakeWetland    | 6249YBP(+/-309)   | NA              | NA         | Ladd, 1979b            |
| Diggers Creek Bog       | NSW   | -36.23   | 148.48    | 1690      | LakeWetland    | 11817YBP(+/-573)  | NA              | 156        | Martin, 1999           |
| Nullabor - N145         | SA    | -32.07   | 127.85    | 15        | LakeWetland    | 24161YBP(+/-2219) | NA              | NA         | Martin, 1973           |
| Nullabor - Madura       | WA    | -31.98   | 127.04    | 27        | LakeWetland    | 8708YBP(+/-846)   | NA              | NA         | Martin, 1973           |
| Nullabor - Norina       | WA    | -32.03   | 126.67    | 19        | LakeWetland    | 10661YBP(+/-475)  | 1142YBP(+/-162) | NA         | Martin, 1973           |
| Cave Bay                | TAS   | -40.53   | 144.77    | 15        | LakeWetland    | 26885YBP(+/-776)  | 0YBP            | NA         | Hope, 1978             |
| Mullins Swamp           | SA    | -37.52   | 140.13    | 13        | LakeWetland    | 4900YBP(+/-138)   | NA              | NA         | Haynes et al., 2007    |
| Lake Bonney             | SA    | -37.75   | 140.33    | 10        | LakeWetland    | 4800YBP(+/-500)   | NA              | NA         | Haynes et al., 2007    |
| Lake Frome              | SA    | -30.62   | 139.87    | 1         | LakeWetland    | NA                | NA              | NA         | Haynes et al., 2007    |
| Macquarie Harbour       | TAS   | -42.30   | 145.42    | 1         | LakeWetland    | NA                | NA              | NA         | McMinn et al., 2003    |
| Orielton Lagoon         | TAS   | -42.79   | 147.07    | 20        | LakeWetland    | 3YBP              | -52YBP          | 5          | Saunders et al., 2007  |
| Lake King               | VIC   | -37.88   | 147.80    | 0         | LakeWetland    | 60YBP             | -55YBP          | 1          | Saunders et al., 2008  |
| Tuckean Swamp           | NSW   | -28.98   | 153.40    | 10        | LakeWetland    | 7443YBP(+/-4)     | -4YBP(+/-5)     | NA         | Taffs et al., 2008     |
| North Stromatolite Lake | SA    | -36.17   | 139.67    | 10        | LakeWetland    | NA                | -46YBP          | NA         | Edwards et al. 2006    |
| Lake Hiawatha           | NSW   | -29.81   | 153.26    | 5         | LakeWetland    | NA                | NA              | NA         | Lane, 1999             |
| Eighteen Mile Swamp     | QLD   | -27.62   | 153.46    | 8         | LakeWetland    | 650YBP            | 0YBP            | NA         | Mettam, 2011           |
| Native Companion Lagoon | QLD   | -27.67   | 153.41    | 20        | LakeWetland    | 25000YBP          | 0YBP            | 67         | Petherick et al., 2009 |
| Killalea Lagoon         | NSW   | -34.60   | 150.87    | 22        | LakeWetland    | 675YBP(+/-202)    | 120YBP          | 78         | Dodson et al., 1993    |
| Ajkwa 1                 | INDO  | -4.87    | 136.97    | 1         | LakeWetland    | 6105YBP(+/-175)   | NA              | 167        | Ellison, 2005          |
| Ajkwa 2                 | INDO  | -4.87    | 136.97    | 1         | LakeWetland    | 9150YBP(+/-450)   | NA              | 165        | Ellison, 2005          |
| Ajkwa 3                 | INDO  | -4.87    | 136.97    | 1         | LakeWetland    | NA                | NA              | 76         | Ellison, 2005          |
| Ajkwa 4                 | INDO  | -4.87    | 136.97    | 1         | LakeWetland    | NA                | NA              | 142        | Ellison, 2005          |
| Ajkwa 5                 | INDO  | -4.87    | 136.97    | 1         | LakeWetland    | NA                | NA              | 125        | Ellison, 2005          |
| Sundown Point           | TAS   | -41.17   | 144.67    | 5         | LakeWetland    | 3500YBP           | NA              | NA         | Hope, 1999             |
| Kurnell Fen             | NSW   | -34.01   | 151.20    | 15        | LakeWetland    | 8818YBP(+/-177)   | NA              | NA         | Martin, 1994           |
| Badu - Waruid           | TS    | -10.07   | 142.15    | 5         | LakeWetland    | 6000YBP           | 0YBP            | 120        | Rowe, 2007             |
| Badu - Bar-20           | TS    | -10.13   | 142.15    | 18        | LakeWetland    | 2652YBP(+/-267)   | 0YBP            | 470        | Rowe, 2007             |

|                      |         |        |        |         |             |                   |                |     |                            |
|----------------------|---------|--------|--------|---------|-------------|-------------------|----------------|-----|----------------------------|
| Argan Swamp          | TS      | -10.05 | 142.06 | 3       | LakeWetland | NA                | NA             | NA  | Rowe, 2006                 |
| Boigu Gawat 1        | TS      | -10.10 | 142.14 | 10      | LakeWetland | 2604YBP(+/-244)   | 0YBP           | 200 | Rowe, 2007                 |
| Talita Kupai         | TS      | -10.10 | 142.12 | 33      | LakeWetland | NA                | NA             | NA  | Rowe, 2006                 |
| Caution Bay - Core1  | PNG     | -9.30  | 147.00 | 4       | LakeWetland | 1715YBP           | 0YBP           | NA  | Rowe et al., 2013          |
| Caution Bay - Core3  | PNG     | -9.30  | 147.00 | 4       | LakeWetland | 2000YBP           | 0YBP           | NA  | Rowe et al., 2013          |
| Four Mile Billabong  | NT      | -13.87 | 136.82 | 1       | LakeWetland | 11488YBP(+/-260)  | 908YBP(+/-349) | 37  | Schulmeister, 1992         |
| Swan-Canning Estuary | WA      | -31.72 | 116.00 | -1      | LakeWetland | 70YBP             | -40YBP         | NA  | Gerritse et al., 1998      |
| Burrill Lake         | NSW     | -35.35 | 150.43 | 1       | LakeWetland | NA                | NA             | NA  | Jones et al., 2003         |
| Lake Macquarie       | NSW     | -33.05 | 151.60 | 0       | LakeWetland | NA                | NA             | 8   | Peters et al., 1999        |
| French Island        | VIC     | -38.31 | 145.30 | 1       | LakeWetland | 35YBP             | -50YBP         | NA  | Rogers et al., 2005        |
| Kooweerup            | VIC     | -38.23 | 145.40 | 1       | LakeWetland | 100YBP            | -50YBP         | NA  | Rogers et al., 2005        |
| Quail Island         | VIC     | -38.24 | 145.30 | 1       | LakeWetland | 72YBP             | -50YBP         | NA  | Rogers et al., 2005        |
| Rhyll                | VIC     | -38.45 | 145.29 | 1       | LakeWetland | 52YBP             | -50YBP         | NA  | Rogers et al., 2005        |
| Bodundara Swamp      | NSW     | -36.25 | 150.06 | 75      | LakeWetland | NA                | NA             | NA  | Hope et al., 2006a         |
| Koumac               | Pacific | -20.65 | 164.28 | 2       | LakeWetland | NA                | NA             | NA  | Hope et al., 1999          |
| Greens Bush          | VIC     | -38.43 | 144.93 | 160     | LakeWetland | NA                | NA             | NA  | Jenkins, 1992              |
| Lake Bumbo           | NSW     | -36.06 | 150.03 | 0       | LakeWetland | NA                | NA             | NA  | Tibby, 1996; Tibby, 1998   |
| Bathurst Harbour     | TAS     | -43.34 | 146.18 | -1      | LakeWetland | 264YBP            | -55YBP         | 4.5 | Saunders et al., 2013b     |
| Beelbi Creek         | QLD     | -25.25 | 152.67 | 5       | LakeWetland | NA                | NA             | NA  | Logan and Taffs, 2013      |
| Bells Creek          | QLD     | -26.82 | 153.07 | 14      | LakeWetland | NA                | NA             | NA  | Logan and Taffs, 2013      |
| Belongil Creek       | QLD     | -28.62 | 153.60 | 5       | LakeWetland | NA                | NA             | NA  | Logan and Taffs, 2013      |
| Deeral Landing       | QLD     | -17.20 | 145.90 | 5       | LakeWetland | NA                | NA             | NA  | Crowley and Gagan, 1995    |
| Mutcherro            | QLD     | -17.20 | 145.90 | 5       | LakeWetland | NA                | NA             | NA  | Crowley and Gagan, 1995    |
| Fitzroy River        | QLD     | -23.50 | 150.79 | Various | LakeWetland | 8390YBP(+/-73)    | 8YBP(+/-35)    | NA  | Bostock et al., 2007       |
| Cotters Lake         | VIC     | -38.9  | 146.25 | 5       | LakeWetland | 4475YBP(+/-380)   | NA             | NA  | Hope, 1974                 |
| Darby Beach          | VIC     | -38.95 | 146.25 | 5       | LakeWetland | 6660YBP(+/-223)   | NA             | NA  | Hope, 1974                 |
| Tidal River          | VIC     | -39.02 | 146.33 | 10      | LakeWetland | 5696YBP(+/-222)   | NA             | NA  | Hope, 1974                 |
| Bolin Billabong      | SA      | -37.77 | 145.67 | 50      | LakeWetland | 830YBP            | -50YBP(+/-2)   | 15  | Leahy et al., 2005         |
| Doge Doge            | Pacific | -17.91 | 177.28 | 8       | LakeWetland | NA                | NA             | NA  | Hope et al., 2009b         |
| North Torbreck       | VIC     | -37.48 | 146.95 | 564     | LakeWetland | 14035YBP(+/-1071) | NA             | 500 | McKenzie, 2002             |
| Wyelangta            | VIC     | -38.65 | 143.46 | 450     | LakeWetland | NA                | NA             | 250 | McKenzie and Kershaw, 2000 |
| Lake Habbema         | PNG     | -4.12  | 138.70 | 3120    | LakeWetland | 11375YBP(+/-175)  | NA             | NA  | Haberle and Ledru, 2001    |
| Rawa Danau           | INDO    | -6.18  | 105.97 | 100     | LakeWetland | 15860YBP(+/-360)  | 410YBP(+/-100) | NA  | Haberle and Ledru, 2001    |
| Lake Majo            | PNG     | -1.47  | 127.48 | 140     | LakeWetland | 4765YBP(+/-105)   | 1220YBP(+/-70) | NA  | Haberle and Ledru, 2001    |
| Lake Nicholls        | TAS     | -42.67 | 146.63 | 1020    | LakeWetland | NA                | -41YBP         | 18  | Cameron et al., 1993       |
| Willsmere Billabong  | VIC     | -37.78 | 145.03 | 20      | LakeWetland | 414YBP(+/-90)     | -51YBP(+/-0.5) | 1   | Gell et al., 2005          |
| Lake Fryxell         | ANT     | -77.61 | 163.14 | 800     | LakeWetland | 48000YBP          | 0YBP           | 260 | Konfirst et al., 2011      |
| Lake Curlip          | VIC     | -37.83 | 148.30 | 5       | LakeWetland | 7776YBP(+/-151)   | -27YBP(+/-3)   | 213 | MacGregor et al., 2005     |

|                          |     |        |        |      |             |                   |                 |     |                           |
|--------------------------|-----|--------|--------|------|-------------|-------------------|-----------------|-----|---------------------------|
| Burrinjuck Reservoir     | NSW | -34.99 | 148.60 | 364  | LakeWetland | 25YBP             | -33YBP          | 1   | Tibby, 2001               |
| Kangaroo Creek Reservoir | SA  | -34.87 | 138.77 | 260  | LakeWetland | -21YBP            | -51YBP          | 1   | Tibby et al., 2010        |
| Callamondah Billabong    | VIC | -36.55 | 146.12 | 215  | LakeWetland | 3770YBP           | -44YBP          | NA  | Tibby et al., 2003        |
| Lake Ainsworth           | NSW | -28.77 | 153.58 | 8    | LakeWetland | 127YBP(+/-7)      | -49YBP(+/-2)    | NA  | Tibby et al., 2007        |
| Lake Surprise            | VIC | -38.06 | 141.92 | 93   | LakeWetland | 1388YBP(+/-110)   | -53YBP(+/-2)    | 4   | Barr et al., 2014         |
| Lake Elingamite          | VIC | -38.35 | 143.00 | 121  | LakeWetland | 1500YBP(+/-123)   | -52YBP(+3)      | 5   | Barr et al., 2014         |
| Lake Bullenmerri         | VIC | -38.24 | 143.11 | 142  | LakeWetland | 9288YBP(+/-252)   | NA              | NA  | De Deckker, 1982          |
| Lake Gnotuk              | VIC | -38.22 | 143.10 | 102  | LakeWetland | 8686YBP (+/-729)  | 1040YBP(+/-266) | NA  | De Deckker, 1982          |
| Lake Keilambete          | VIC | -38.21 | 142.88 | 120  | LakeWetland | 11018YBP(+/-594)  | NA              | NA  | De Deckker, 1982          |
| Lake Purrumbete          | VIC | -38.27 | 143.22 | 132  | LakeWetland | NA                | NA              | NA  | De Deckker, 1982          |
| Lake Baraba              | NSW | -34.22 | 150.22 | 305  | LakeWetland | NA                | NA              | 105 | Black et al., 2006        |
| Carlisle Perched Lake    | VIC | -37.92 | 143.67 | 70   | LakeWetland | NA                | NA              | NA  | Bottomley, 1994           |
| Lake Condah              | VIC | -38.07 | 141.83 | 60   | LakeWetland | 11400YBP(+/-440)  | NA              | 525 | Builth et al., 2008       |
| Lake Surprise            | VIC | -38.06 | 141.92 | 93   | LakeWetland | 28840YBP(+/-370)  | 2160YBP(+/-100) | 150 | Builth et al., 2008       |
| Penrith Lakes            | NSW | -33.71 | 150.68 | 18   | LakeWetland | 37600YBP          | 0YBP            | 380 | Charlson and Martin, 2008 |
| Rottnest Island          | WA  | -32.00 | 115.50 | 8    | LakeWetland | NA                | NA              | NA  | Churchill, 1968           |
| Perth                    | WA  | -31.96 | 115.85 | -20  | LakeWetland | NA                | NA              | NA  | Churchill, 1968           |
| Fremantle                | WA  | -32.03 | 115.75 | 43   | LakeWetland | NA                | 10000YBP        | NA  | Churchill, 1968           |
| Myalup Swamp             | WA  | -33.12 | 115.72 | 10   | LakeWetland | NA                | NA              | NA  | Churchill, 1968           |
| Weld Swamp               | WA  | -34.68 | 116.52 | 150  | LakeWetland | NA                | NA              | NA  | Churchill, 1968           |
| West Lake Muir           | WA  | -34.47 | 116.60 | 170  | LakeWetland | NA                | NA              | NA  | Churchill, 1968           |
| Flinders Bay Swamp       | WA  | -34.32 | 115.15 | 15   | LakeWetland | NA                | NA              | NA  | Churchill, 1968           |
| Scott River Swamp        | WA  | -34.30 | 115.28 | 30   | LakeWetland | NA                | NA              | NA  | Churchill, 1968           |
| Boggy Lake               | WA  | -35.17 | 116.63 | 107  | LakeWetland | NA                | NA              | NA  | Churchill, 1968           |
| Poets Hill               | TAS | -41.88 | 145.56 | 600  | LakeWetland | 13371YBP(+/-2156) | NA              | 700 | Colhoun, 1992             |
| Lake Bolac               | VIC | -37.70 | 142.75 | 220  | LakeWetland | 13460YBP(+/-550)  | 110YBP          | 250 | Cook, 2009                |
| Lake Turangmoroke        | VIC | -37.73 | 142.89 | 220  | LakeWetland | 90000YBP(+/-5000) | 110YBP          | 113 | Cook, 2009                |
| Freshwater Lake          | VIC | -37.58 | 142.32 | 220  | LakeWetland | 7000YBP           | NA              | NA  | Crowley, 1994             |
| Fiery Creek              | VIC | -37.73 | 142.88 | 215  | LakeWetland | 4232YBP(+/-298)   | NA              | NA  | Crowley and Kershaw, 1994 |
| Lake Turangmoroke        | VIC | -37.73 | 142.89 | 220  | LakeWetland | 20000YBP          | NA              | NA  | Crowley and Kershaw, 1994 |
| Warrananga               | NSW | -33.97 | 141.56 | 22   | LakeWetland | 53400YBP(+/-8000) | 0YBP            | 270 | Cupper, 2005              |
| Warrananga               | NSW | -33.97 | 141.56 | 22   | LakeWetland | 5079YBP(+/-208)   | 0YBP            | 540 | Cupper et al., 2000       |
| Pine Camp                | NSW | -34.75 | 141.13 | 21   | LakeWetland | 32000YBP(+/-1900) | 0YBP            | 340 | Cupper, 2005              |
| Lake Tower Hill          | VIC | -38.30 | 142.35 | 10   | LakeWetland | 22074YBP(+/-613)  | NA              | 30  | D'Costa et al., 1989      |
| Solomans Jewel           | TAS | -41.80 | 146.27 | 1185 | LakeWetland | NA                | NA              | NA  | Dodson, 2001              |
| Lake Bullenmerri         | VIC | -38.24 | 143.11 | 142  | LakeWetland | 19358YBP(+/-396)  | 8000YBP         | 10  | Dodson, 1979              |
| Bondi Lake               | NSW | -36.81 | 149.94 | 22   | LakeWetland | 2062YBP(+/-237)   | -43YBP          | 78  | Dodson et al., 1993       |
| Lake Leake               | SA  | -37.60 | 140.58 | 85   | LakeWetland | 10713YBP(+/-414)  | 0YBP            | NA  | Dodson, 1974              |

|                       |         |        |         |      |             |                    |                 |      |                                      |
|-----------------------|---------|--------|---------|------|-------------|--------------------|-----------------|------|--------------------------------------|
| Byenup Lagoon         | WA      | -34.51 | 116.67  | 175  | LakeWetland | 5282YBP(+/-301)    | -47YBP          | NA   | Dodson and Lu, 2000                  |
| Cuddie Springs        | NSW     | -30.38 | 147.31  | 127  | LakeWetland | 39182YBP(+/-5240)  | 1334YBP(+/-149) | NA   | Field et al., 2002                   |
| Rawa Danau            | INDO    | -6.18  | 105.97  | 100  | LakeWetland | 15674YBP(+/-752)   | NA              | 381  | Van der Kaars et al., 2001           |
| Lake Fidler           | TAS     | -42.50 | 145.66  | 1    | LakeWetland | 8699YBP(+/-279)    | 2012YBP(+/-136) | 265  | Harle et al., 1999                   |
| Lake Wangoom          | VIC     | -38.35 | 142.60  | 100  | LakeWetland | 200000YBP(+60/-40) | 2344YBP(+/-358) | 1000 | Harle et al., 2002b                  |
| Tagamaucia            | Pacific | -16.49 | -179.56 | 820  | LakeWetland | 34000YBP           | NA              | NA   | Hope, 1996a; Hope et al., 2009b      |
| Lac Suprin            | Pacific | -22.29 | 166.98  | 235  | LakeWetland | 34355YBP(+/-1611)  | NA              | NA   | Hope and Pask, 1998                  |
| Lac Xere Wapo         | Pacific | -22.29 | 166.98  | 235  | LakeWetland | 36531YBP(+/-1037)  | NA              | NA   | Hope and Pask, 1998                  |
| Lac Emeric            | Pacific | -22.29 | 166.98  | 230  | LakeWetland | 34392YBP(+/-881)   | NA              | NA   | Hope and Pask, 1998                  |
| Lac Boulet            | Pacific | -22.29 | 166.98  | 228  | LakeWetland | 33280YBP(+/-1027)  | NA              | NA   | Hope and Pask, 1998                  |
| Lake St Clair         | TAS     | -42.10 | 146.19  | 737  | LakeWetland | NA                 | NA              | 450  | Hopf et al., 2000                    |
| Two Mile Lake         | WA      | -34.51 | 118.27  | 140  | LakeWetland | 8893YBP(+/-243)    | NA              | 250  | Itzstein-Davey, 2004                 |
| Terragong Swamp       | NSW     | -34.67 | 150.83  | 1    | LakeWetland | 4932YBP(+/-345)    | NA              | NA   | Jones, 1990                          |
| Lynch's Crater        | QLD     | -17.62 | 146.17  | 760  | LakeWetland | 230000YBP          | 3385YBP(+/-172) | NA   | Kershaw, 1983; Kershaw et al., 2007a |
| Lake Curlip           | VIC     | -37.83 | 148.30  | 5    | LakeWetland | 5963YBP(+/-314)    | NA              | NA   | Ladd, 1978                           |
| Old Lake Coomboo      | QLD     | -25.22 | 153.20  | 90   | LakeWetland | NA                 | 81YBP(+/-54)    | 1000 | Longmore, 1997                       |
| Lake Tiberias         | TAS     | -42.37 | 147.37  | 440  | LakeWetland | NA                 | NA              | NA   | Macphail, 1979                       |
| Lake Vera             | TAS     | -42.53 | 145.87  | 1443 | LakeWetland | 13294YBP(+/-488)   | NA              | 350  | Macphail, 1979                       |
| Tarn Shelf            | TAS     | -42.67 | 146.50  | 1185 | LakeWetland | 11102YBP(+/-604)   | NA              | 810  | Macphail, 1979                       |
| Eagle Tarn            | TAS     | -42.67 | 146.50  | 1033 | LakeWetland | 13214YBP(+/-484)   | NA              | 240  | Macphail, 1979                       |
| Beatties Tarn         | TAS     | -42.67 | 146.50  | 990  | LakeWetland | NA                 | NA              | 430  | Macphail, 1979                       |
| Den Plane             | TAS     | -41.50 | 146.34  | 350  | LakeWetland | 2610YBP(+/-90)     | -44YBP          | 200  | Moss et al., 2007                    |
| Loch McNess Swamp     | WA      | -31.53 | 115.67  | 68   | LakeWetland | 10067YBP(+/-1056)  | NA              | NA   | Newsome and Pickett, 1993            |
| Boggy Lake            | WA      | -35.03 | 116.65  | 83   | LakeWetland | 4926YBP(+/-386)    | NA              | NA   | Newsome and Pickett, 1993            |
| Lake George           | NSW     | -35.00 | 149.42  | 673  | LakeWetland | 730000YBP          | 0YBP            | NA   | Singh and Geissler, 1985             |
| Lake Frome            | SA      | -30.50 | 139.50  | 40   | LakeWetland | 20549YBP(+/-782)   | NA              | NA   | Luly, 2001; Singh and Luly, 1991     |
| Xere Wapo B           | Pacific | -22.29 | 166.97  | 220  | LakeWetland | NA                 | NA              | NA   | Stevenson and Hope, 2005             |
| Salt Lake             | VIC     | -36.54 | 141.81  | 109  | LakeWetland | 10137YBP(+/-350)   | NA              | 295  | Thomas et al. 2001                   |
| Bridgewater Lake      | VIC     | -38.30 | 141.38  | 20   | LakeWetland | 7519YBP(+/-186)    | NA              | NA   | Head, 1988                           |
| Barker Swamp          | WA      | -32.00 | 115.51  | 0    | LakeWetland | 8004YBP(+/-380)    | NA              | NA   | Backhouse, 1993                      |
| Lake Johnson          | TAS     | -41.52 | 145.44  | 900  | LakeWetland | 10660YBP(+/-410)   | NA              | 43   | Anker et al., 2001                   |
| Breadalbane - NW      | NSW     | -34.80 | 149.52  | 694  | LakeWetland | NA                 | NA              | NA   | Dodson, 1986                         |
| Breadalbane - NE      | NSW     | -34.80 | 149.52  | 694  | LakeWetland | 1240YBP            | 60YBP           | NA   | Dodson, 1986                         |
| Breadalbane - SE      | NSW     | -34.80 | 149.52  | 694  | LakeWetland | NA                 | 0YBP            | NA   | Dodson, 1986                         |
| Wet Lagoon            | NSW     | -34.47 | 149.25  | 700  | LakeWetland | 5000YBP            | 0YBP            | NA   | Dodson, 1986                         |
| Black Mountain Lagoon | NSW     | -30.18 | 151.20  | 1335 | LakeWetland | 34YBP              | -41YBP          | 5    | Haworth et al., 1999                 |
| Lake Fryxell          | ANT     | -77.61 | 163.14  | 800  | LakeWetland | 48000YBP           | 65YBP(+/-70)    | 260  | Wagner et al., 2006                  |
| Burrinjuck Reservoir  | NSW     | -35.02 | 148.58  | 364  | LakeWetland | 25YBP              | -32YBP          | NA   | Wasson et al., 1987                  |

|                         |         |        |        |      |             |                   |                |      |                                   |
|-------------------------|---------|--------|--------|------|-------------|-------------------|----------------|------|-----------------------------------|
| Ranu Lamongan           | INDO.   | -7.98  | 113.38 | 240  | LakeWetland | 731YBP            | -48YBP         | 1    | Crausbay et al., 2006             |
| Vanderlin Island        | QLD     | -15.68 | 137.03 | 6    | LakeWetland | 9410YBP(+/-150)   | NA             | NA   | Prebble et al., 2005              |
| Lake Selina             | TAS     | -41.88 | 145.60 | 516  | LakeWetland | 30120YBP          | NA             | NA   | Colhoun et al., 1999              |
| Lake Couridjah          | NSW     | -34.23 | 150.54 | 310  | LakeWetland | NA                | NA             | NA   | Clark and Hope, 1997              |
| Dove Lake               | TAS     | -41.66 | 145.96 | 934  | LakeWetland | NA                | NA             | NA   | Dyson, 1995                       |
| Aguai Ramata            | INDO    | -6.56  | 145.21 | 1950 | LakeWetland | NA                | NA             | NA   | Haberle, 2007                     |
| Sondambile              | PNG     | -6.35  | 147.11 | 2850 | LakeWetland | NA                | NA             | NA   | Haberle et al., 2005              |
| Wanum                   | PNG     | -6.64  | 146.80 | 35   | LakeWetland | NA                | NA             | NA   | Haberle et al., 2005              |
| Lake Horden             | VIC     | -38.78 | 143.47 | 3    | LakeWetland | NA                | NA             | NA   | Head and Stuart, 1980; Head, 1985 |
| Anggi Lake              | INDO    | -1.40  | 133.90 | 1945 | LakeWetland | NA                | NA             | NA   | Hope, 2007b                       |
| Evoran Pond             | Pacific | -18.76 | 169.01 | 194  | LakeWetland | NA                | NA             | NA   | Hope, G.S., Unpub.                |
| Hogayaku                | PNG     | -3.98  | 137.38 | 3580 | LakeWetland | NA                | NA             | NA   | Hope, 2007a                       |
| Mountain Lagoon         | NSW     | -33.50 | 150.52 | 604  | LakeWetland | NA                | NA             | NA   | Robbie, 1998                      |
| Lashmars Lagoon         | SA      | -35.80 | 138.07 | 2    | LakeWetland | 9624YBP(+/-1128)  | NA             | NA   | Singh et al., 1981; Illman, 1997  |
| Hopwoods Lagoon         | NSW     | -33.22 | 150.99 | 38   | LakeWetland | NA                | NA             | NA   | Smeulders, 1999                   |
| Quambie Lagoon          | NT      | -12.50 | 131.17 | 20   | LakeWetland | NA                | NA             | NA   | Stevenson, J., Unpub.             |
| Redhead Lagoon          | NSW     | -32.98 | 151.72 | 85   | LakeWetland | 79100YBP(+/-5200) | 3290YBP(+/-69) | 115  | Williams et al., 2006             |
| Worimi Swamp            | NSW     | -32.52 | 152.33 | 8    | LakeWetland | 2796YBP           | -20YBP         | 26   | Mooney and Maltby, 2006           |
| Gorge Weir              | SA      | -31.92 | 139.90 | 214  | LakeWetland | NA                | -46YBP         | NA   | Gell et al., 1999                 |
| Lake McKenzie           | QLD     | -25.45 | 153.05 | 90   | LakeWetland | 36179YBP(+/-604)  | -55YBP (+/-2)  | 208  | Hembrow et al., 2014              |
| Lake Euramoo            | QLD     | -17.16 | 145.63 | 718  | LakeWetland | 22680YBP(+/-750)  | -49YBP         | 240  | Tibby and Haberle, 2007           |
| West Basin Lake         | VIC     | -38.32 | 143.43 | 120  | LakeWetland | 11431YBP(+/-546)  | NA             | 540  | Gell et al., 1994                 |
| Lake Alexandria         | SA      | -35.35 | 139.38 | 0    | LakeWetland | 7822YBP(+/-553)   | 28YBP          | NA   | Fluin et al., 2007                |
| Coorong                 | SA      | -35.62 | 139.05 | 0    | LakeWetland | 7155YBP(+/-136)   | 12YBP          | NA   | Fluin et al., 2007                |
| Tareena Billabong       | NSW     | -33.9  | 141.00 | 20   | LakeWetland | 5531YBP(+/-200)   | NA             | 1000 | Gell et al., 2005                 |
| Native Companion Lagoon | QLD     | -27.67 | 153.41 | 20   | LakeWetland | 25000YBP          | 538YBP(+/-18)  | 30   | McGowan et al., 2008              |
| Lake McKenzie           | QLD     | -25.45 | 153.05 | 90   | LakeWetland | 37300YBP(+/-400)  | -55YBP(+/-5)   | 208  | Woltering et al., 2014            |
| Myall Lakes             | NSW     | -32.50 | 152.00 | 8    | LakeWetland | 793YBP(+/-106)    | -51YBP         | 13   | Leyden et al., 2011               |
| Hogan's Billabong       | NSW     | -36.03 | 146.72 | 152  | LakeWetland | 1400YBP(+/-120)   | NA             | 80   | Reid et al, 2007                  |
| East Basin Lake         | VIC     | -38.32 | 143.45 | 120  | LakeWetland | NA                | NA             | NA   | Last and De Deckker, 1990         |
| West Basin Lake         | VIC     | -38.32 | 143.43 | 120  | LakeWetland | NA                | NA             | NA   | Last and De Deckker, 1990         |
| Blue Lake               | SA      | -37.01 | 140.01 | 24   | LakeWetland | 5690YBP(+/-185)   | 0YBP           | 45   | Gouramanis et al., 2010           |
| Jacka Lake              | VIC     | -36.80 | 141.80 | 132  | LakeWetland | 7721YBP(+/-1000)  | -50YBP         | 60   | Kemp et al., 2012                 |
| Northwest Jacka         | VIC     | -36.80 | 141.80 | 132  | LakeWetland | 11395YBP          | 0YBP           | 197  | Kemp et al., 2012                 |
| Lake Gnotuk             | VIC     | -38.17 | 143.30 | 102  | LakeWetland | 11561YBP          | 0YBP           | 140  | Wilkins et al., 2013              |
| Barker Swamp            | WA      | -32.00 | 115.51 | 0    | LakeWetland | 7900YBP(+/-150)   | 130YBP         | 118  | Gouramanis et al., 2012           |
| Lake Lading             | INDO.   | -8.01  | 138.31 | 324  | LakeWetland | 852YBP            | -50YBP         | 8.5  | Konecky et al., 2013              |
| Lake Wangoom            | VIC     | -30.35 | 142.60 | 15   | LakeWetland | 46513YBP(+/-2572) | NA             | 390  | Edney et al., 1990                |

|                    |       |        |        |      |             |                  |                 |      |                                                     |
|--------------------|-------|--------|--------|------|-------------|------------------|-----------------|------|-----------------------------------------------------|
| Lake Euramoo       | QLD   | -17.16 | 145.63 | 718  | LakeWetland | 22680YBP(+/-750) | -49YBP          | 31   | Haberle, 2005                                       |
| Quincan Crater     | QLD   | -17.30 | 145.58 | 630  | LakeWetland | 8031YBP(+/-350)  | NA              | 3800 | Kershaw, 1971                                       |
| Lake Tyrrell       | VIC   | -35.30 | 142.78 | 42   | LakeWetland | 10000YBP         | NA              | NA   | Luly et al., 1986; Luly, 1993                       |
| Blue Lake          | NSW   | -36.40 | 148.32 | 1850 | LakeWetland | NA               | NA              | 250  | Raine, 1974                                         |
| Crown Lagoon       | TAS   | -42.28 | 147.63 | 375  | LakeWetland | NA               | NA              | NA   | Sigleo and Colhoun, 1981                            |
| Lake Eacham        | QLD   | -17.27 | 145.63 | 720  | LakeWetland | -28YBP           | -35YBP          | NA   | Goodfield, 1983; Grindrod, 1979                     |
| Lake Colac         | VIC   | -38.30 | 143.58 | 115  | LakeWetland | 6055YBP(+/-25)   | -58YBP(+/-0)    | 10   | Mills et al., 2011                                  |
| Lake Purrumbete    | VIC   | -38.27 | 143.22 | 132  | LakeWetland | 5665YBP(+/-75)   | -58YBP(+/-0)    | 10   | Mills et al., 2011                                  |
| Lake Tower Hill    | VIC   | -38.30 | 142.35 | 10   | LakeWetland | 5080YBP(+/-205)  | NA              | 10   | Mills et al., 2011                                  |
| Lake Modewarre     | VIC   | -38.24 | 144.11 | 111  | LakeWetland | 10340YBP(+/-100) | -59YBP(+/-0)    | 10   | Mills et al., 2011                                  |
| Lake Purrumbete    | VIC   | -38.27 | 143.22 | 132  | LakeWetland | 7937YBP(+/-89)   | 50YBP           | 8    | Tibby et al., 2012                                  |
| Lake Dora          | TAS   | -41.93 | 145.65 | 756  | LakeWetland | 139YBP           | -49YBP(+/-1)    | 6    | Harle et al., 2002a                                 |
| Club Lake          | NSW   | -36.41 | 148.29 | 1955 | LakeWetland | 796YBP(+/-129)   | 0YBP            | 7    | Dodson et al., 1994a                                |
| Lake Allom         | QLD   | -25.23 | 153.17 | 100  | LakeWetland | NA               | -53YBP          | 45   | Donders et al., 2006                                |
| Lake Keilambete    | VIC   | -38.21 | 142.88 | 120  | LakeWetland | 2000YBP          | 265YBP          | 45   | Mooney, 1997                                        |
| Brownes Lake       | SA    | -37.75 | 140.75 | 80   | LakeWetland | NA               | NA              | NA   | Dodson, 1975                                        |
| Crescent Lagoon    | QLD   | -23.40 | 150.48 | 7    | LakeWetland | 30YBP            | -53YBP          | 3    | Douglas et al., 2010                                |
| Hidden Lake        | QLD   | -25.23 | 153.17 | 100  | LakeWetland | 421YBP(+/-121)   | -24YBP          | 1    | Longmore et al., 1983; Torgersen and Longmore, 1984 |
| Pelican Island     | NSW   | -33.3  | 151.48 | 0    | LakeWetland | 9000YBP(+/-400)  | NA              | 88   | Macreadie et al., 2015                              |
| Chittaway Bay      | NSW   | -33.3  | 151.45 | 0    | LakeWetland | 6000YBP(+/-240)  | NA              | 76   | Macreadie et al., 2015                              |
| Lake Logung        | INDO. | -8.04  | 113.31 | 215  | LakeWetland | 1336YBP          | -59YBP          | 9    | Rodysill et al., 2013                               |
| Rebecca Lagoon     | TAS   | -41.18 | 144.68 | 8    | LakeWetland | 3654YBP          | -58YBP          | 12   | Saunders et al., 2012                               |
| Duckhole Lake      | TAS   | -43.36 | 146.87 | 150  | LakeWetland | 850YBP           | -58YBP          | 2    | Saunders et al., 2013a                              |
| Myall Lakes        | NSW   | -32.50 | 152.00 | 8    | LakeWetland | 12508YBP         | 1603YBP         | NA   | Skilbeck et al., 2005                               |
| Lake Tali Karng    | VIC   | -37.58 | 146.78 | 915  | LakeWetland | 70YBP            | -32YBP          | NA   | Smith and Hamilton, 1985; Salas, 1981               |
| Blue Lake          | NSW   | -36.40 | 148.32 | 1850 | LakeWetland | 12200YBP         | 100YBP(+/-40)   | 125  | Stanley and De Deckker, 2002                        |
| Lake Barrine       | QLD   | -17.25 | 145.63 | 721  | LakeWetland | 5160YBP(+/-292)  | -37YBP(+/-1)    | 6    | Walker, 2011                                        |
| Lake Keilambete    | VIC   | -38.21 | 142.88 | 120  | LakeWetland | 9542YBP(+/-200)  | -54YBP          | 50   | Wilkins et al., 2013                                |
| Lake Tabourie      | NSW   | -35.42 | 150.41 | 5    | LakeWetland | NA               | NA              | NA   | Fitzgerald, 1998                                    |
| Lake Minnie Water  | NSW   | -29.78 | 153.26 | 27   | LakeWetland | NA               | NA              | NA   | Lane, 1999; Allan, 2006                             |
| Lake Conjola       | NSW   | -35.24 | 150.45 | 1    | LakeWetland | NA               | NA              | NA   | Packwood, 1999                                      |
| Lake Coleman       | VIC   | -38.17 | 147.30 | 20   | LakeWetland | NA               | NA              | NA   | Penny, 1993                                         |
| Lake Cullulleraine | VIC   | -34.27 | 141.75 | 57   | LakeWetland | NA               | NA              | NA   | Reid et al., 2003                                   |
| Lake Dunn          | QLD   | -22.60 | 145.68 | -2   | LakeWetland | NA               | NA              | NA   | Sim, 2004                                           |
| Lake Cudgen        | NSW   | -28.33 | 153.56 | 10   | LakeWetland | NA               | NA              | NA   | Wills, 2001                                         |
| Lake Terang        | VIC   | -38.25 | 142.92 | 130  | LakeWetland | 75000YBP         | 2094YBP(+/-254) | NA   | D'Costa and Kershaw, 1995                           |
| Noreikora Swamp    | PNG   | -6.33  | 145.83 | 1750 | LakeWetland | 5085YBP(+/-215)  | 240YBP          | NA   | Haberle and Ledru, 2001                             |
| Haeapugua          | PNG   | -5.83  | 142.78 | 1650 | LakeWetland | 31818YBP(+/-818) | 240YBP          | NA   | Haberle, 1998                                       |

|                          |     |        |                 |      |             |                   |                |      |                               |
|--------------------------|-----|--------|-----------------|------|-------------|-------------------|----------------|------|-------------------------------|
| Tyrendarra Swamp         | VIC | -38.20 | 141.76          | 13   | LakeWetland | 31950YBP(+/-280)  | NA             | 1800 | Builth et al., 2008           |
| Noreikora Swamp          | PNG | -6.33  | 145.83          | 1750 | LakeWetland | 5085YBP(+/-215)   | 240YBP         | NA   | Harberle, 1996a               |
| Brown Marsh              | TAS | -42.22 | 146.57          | 750  | LakeWetland | NA                | NA             | NA   | Macphail, 1979                |
| Brown Marsh              | TAS | -42.22 | 146.57          | 750  | LakeWetland | NA                | NA             | NA   | Macphail et al., 2001         |
| The Gap and Coturaundee  | NSW | -30.00 | 142.67          | 120  | LakeWetland | 7377YBP(+/-102)   | 219YBP(+/-219) | NA   | Allen et al., 2000            |
| Flinders Ranges          | SA  | -30.32 | 139.39          | 120  | LakeWetland | 12742YBP(+/-173)  | 594YBP(+/-134) | NA   | McCarthy et al., 1996         |
| Northern Flinders Ranges | SA  | -30.32 | 139.39          | 175  | LakeWetland | 8460YBP(+/-235)   | 0YBP           | NA   | McCarthy and Head, 2001       |
| Kings Waterhole          | NSW | -33.02 | 150.67          | 280  | LakeWetland | 6250YBP(+/-240)   | 30YBP          | 28   | Black and Mooney, 2007        |
| Wilson Bog               | SA  | -34.97 | 138.69          | 425  | LakeWetland | 7730YBP(+/-590)   | 0YBP           | 17   | Buckman et al., 2009          |
| Ijomba                   | PNG | -4.03  | 137.22          | 3630 | LakeWetland | 16625YBP(+/-375)  | 7350YBP(+/-80) | NA   | Haberle and Ledru, 2001       |
| Tugupugua                | PNG | -5.67  | 142.61          | 2300 | LakeWetland | 15225YBP(+/-975)  | 810YBP(+/-100) | NA   | Haberle and Ledru, 2001       |
| Jibbon Lagoon            | NSW | -34.08 | 151.15          | 65   | LakeWetland | 1600YBP           | -49YBP         | 14   | Mooney et al., 2001           |
| Cascade Bog              | VIC | -37.85 | 146.32          | 1370 | LakeWetland | NA                | NA             | NA   | Strickland, 1980              |
| Hawkesbury Valley        | NSW | -33.40 | 151.03          | 30   | LakeWetland | NA                | -50YBP         | 1    | McMinn et al., 2004           |
| Butcher Swamp            | NSW | -31.92 | 151.40          | 1230 | LakeWetland | 13061YBP(+/-243)  | 0YBP           | NA   | Dodson, 1987                  |
| Horse Swamp              | NSW | -31.92 | 151.37          | 1260 | LakeWetland | 12887YBP(+/-326)  | NA             | NA   | Dodson, 1987                  |
| Boggy Swamp              | NSW | -29.96 | 151.50          | 1170 | LakeWetland | 10383YBP(+/-705)  | 0YBP           | NA   | Dodson, 1987                  |
| Top Swamp                | NSW | -31.90 | 151.40          | 1500 | LakeWetland | 3541YBP(+/-178)   | NA             | NA   | Dodson, 1987                  |
| Polblue Swamp            | NSW | -31.97 | 151.42          | 1450 | LakeWetland | 6118YBP(+/-793)   | NA             | NA   | Dodson, 1987                  |
| Killer Bog               | NSW | -32.07 | 151.55          | 1320 | LakeWetland | 1152YBP(+/-360)   | 0YBP           | NA   | Dodson, 1987                  |
| Sapphire Swamp           | NSW | -32.07 | 151.57          | 1280 | LakeWetland | 223YBP(+/-223)    | NA             | NA   | Dodson, 1987                  |
| Clive Swamp              | NSW | -31.98 | 151.45          | 1275 | LakeWetland | 223YBP(+/-223)    | NA             | NA   | Dodson, 1987                  |
| Melaleuca Tin Mine       | TAS | -43.42 | 146.16          | 100  | LakeWetland | 5719YBP(+/-4758)  | 428YBP(+/-105) | NA   | Macphail et al., 1999         |
| Tadpole Swamp            | VIC | -38.13 | 145.28          | 60   | LakeWetland | 9455YBP(+/-167)   | NA             | 350  | Aitken and Kershaw, 1992      |
| Tiger Snake Swamp        | VIC | -38.13 | 145.28          | 60   | LakeWetland | NA                | NA             | NA   | Aitken and Kershaw, 1992      |
| Fred South Swamp         | VIC | -38.14 | 141.78          | 27   | LakeWetland | 16500YBP(+/-540)  | NA             | 2000 | Builth et al., 2008           |
| Burralow Creek Swamp     | NSW | -33.58 | 150.63          | 320  | LakeWetland | NA                | 0YBP           | 60   | Chalson and Martin, 2009      |
| Ingar Swamp              | NSW | -33.77 | 150.46          | 584  | LakeWetland | 7188YBP(+/-90)    | 0YBP           | NA   | Chalson and Martin, 2009      |
| Katoomba Swamp           | NSW | -33.72 | 150.31.31<br>86 | 950  | LakeWetland | 12558YBP(+/-170)  | NA             | NA   | Chalson and Martin, 2009      |
| Kings Tableland Swamp    | NSW | -33.73 | 150.48          | 780  | LakeWetland | NA                | NA             | 250  | Chalson and Martin, 2009      |
| Newnes Swamp             | NSW | -33.38 | 150.22          | 1060 | LakeWetland | 11038YBP(+/-160)  | 0YBP           | 970  | Chalson and Martin, 2009      |
| Notts Swamp              | NSW | -33.81 | 150.41          | 682  | LakeWetland | 6478YBP(+/-80)    | 0YBP           | 420  | Chalson and Martin, 2009      |
| Warrimoo Swamp           | NSW | -33.72 | 150.62          | 195  | LakeWetland | 4668YBP(+/-140)   | 738YBP(+/-80)  | 230  | Chalson and Martin, 2009      |
| Blue Mountain Bog        | NSW | -33.80 | 150.57          | 790  | LakeWetland | NA                | NA             | NA   | Chalson, 1991                 |
| Dublin Bog               | TAS | -41.73 | 146.23          | 710  | LakeWetland | 16044YBP(+/-1266) | NA             | 186  | Colhoun et al., 1991          |
| Darwin Crater            | TAS | -42.28 | 145.67          | 245  | LakeWetland | NA                | NA             | NA   | Colhoun and van de Geer, 1988 |
| Lake Flannigan           | BS  | -39.60 | 143.95          | 40   | LakeWetland | NA                | NA             | NA   | D'Costa, 1997                 |
| Black Swamp              | NSW | -30.02 | 151.48          | 1450 | LakeWetland | 9634YBP(+/-486)   | NA             | NA   | Dodson, 1987                  |

|                        |         |        |        |      |             |                   |                 |     |                            |
|------------------------|---------|--------|--------|------|-------------|-------------------|-----------------|-----|----------------------------|
| Upper Ringarooma River | TAS     | -41.30 | 147.67 | 900  | LakeWetland | 1000YBP           | NA              | NA  | Dodson et al., 1998        |
| Cobrico Swamp          | VIC     | -38.30 | 143.03 | 140  | LakeWetland | 1500YBP           | -39YBP          | 50  | Dodson et al., 1994b       |
| Mt Burr Swamp          | SA      | -37.62 | 140.53 | 77   | LakeWetland | 8211YBP(+/-188)   | NA              | NA  | Dodson and Wilson, 1975    |
| Blue Tea Tree Swamp    | SA      | -37.62 | 140.53 | 77   | LakeWetland | 9615YBP(+/-288)   | NA              | NA  | Dodson and Wilson, 1975    |
| Whitehaven Swamp       | QLD     | -20.30 | 148.90 | 45   | LakeWetland | 7740YBP(+/-60)    | NA              | NA  | Genever et al., 2003       |
| Laukutu Swamp          | Pacific | -9.48  | 160.09 | 20   | LakeWetland | 2019YBP(+/-289)   | NA              | NA  | Haberle, 1996              |
| Mela Swamp             | Pacific | -9.48  | 160.09 | 20   | LakeWetland | 2029YBP(+/-282)   | NA              | NA  | Haberle, 1996              |
| Tugupugua              | PNG     | -5.67  | 142.61 | 2300 | LakeWetland | 15225YBP(+/-975)  | 810YBP(+/-100)  | NA  | Haberle, 1998              |
| Kelela Swamp           | INDO    | -4.02  | 138.91 | 1650 | LakeWetland | 7775YBP(+/-165)   | NA              | 165 | Haberle et al., 1991       |
| Supulah Hill           | PNG     | -4.12  | 138.97 | 1580 | LakeWetland | 37369YBP(+/-2387) | NA              | 100 | Hope, 1998                 |
| Loch Sport Swamp       | VIC     | -37.97 | 147.68 | 2    | LakeWetland | 8024YBP(+/-604)   | NA              | NA  | Hooley, 1980               |
| Wanda                  | INDO    | -2.33  | 121.23 | 440  | LakeWetland | 37877YBP(+/-2570) | NA              | NA  | Hope, 2001                 |
| Stockyard Swamp        | TAS     | -40.55 | 144.75 | 65   | LakeWetland | 3480YBP(+/-214)   | NA              | NA  | Hope, 1999                 |
| Mago Island            | Pacific | -17.44 | 179.16 | 2    | LakeWetland | 7500YBP           | 5625YBP(+/-305) | NA  | Hope et al., 2009b         |
| Sari                   | Pacific | -16.63 | 179.50 | 67   | LakeWetland | 6500YBP(+/-930)   | NA              | NA  | Hope et al., 2009b         |
| Yacata                 | Pacific | -17.16 | 179.51 | 4    | LakeWetland | 6485YBP(+/-1015)  | NA              | NA  | Hope et al., 2009b         |
| Lake Hordorli          | PNG     | -2.53  | 140.55 | 680  | LakeWetland | 38544YBP(+/-2280) | NA              | 855 | Hope and Tulip, 1994       |
| Caledonia Fen          | VIC     | -37.33 | 146.73 | 1280 | LakeWetland | 68000YBP(+/-8000) | NA              | 275 | Kershaw et al., 2007b      |
| Five Mile Beach        | VIC     | -38.95 | 146.47 | 20   | LakeWetland | 13000YBP          | NA              | 650 | Ladd, 1979b                |
| Morwell Swamp          | VIC     | -38.25 | 146.42 | 40   | LakeWetland | 9854YBP(+/-331)   | NA              | NA  | Lloyd and Kershaw, 1997    |
| Adamsons Peak          | TAS     | -43.35 | 146.82 | 960  | LakeWetland | NA                | NA              | NA  | Macphail, 1979             |
| Ben Lomond             | TAS     | -41.33 | 147.75 | 850  | LakeWetland | NA                | NA              | NA  | Macphail, 1975             |
| Oaks Creek             | NSW     | -37.59 | 146.17 | 610  | LakeWetland | 6347YBP(+/-327)   | NA              | 420 | McKenzie, 2002             |
| Buxton                 | VIC     | -37.45 | 145.66 | 235  | LakeWetland | 6634YBP(+/-222)   | NA              | 185 | McKenzie, 2002             |
| Lake Mountain          | VIC     | -37.47 | 145.88 | 1450 | LakeWetland | 7418YBP(+/-153)   | 0YBP            | 230 | McKenzie, 1997             |
| Powelltown             | VIC     | -37.87 | 145.70 | 168  | LakeWetland | 6613YBP(+/-287)   | NA              | 310 | McKenzie, 2002             |
| Snobs Creek            | VIC     | -37.56 | 145.93 | 775  | LakeWetland | 12460YBP(+/-355)  | NA              | NA  | McKenzie, 1997             |
| Storm Creek            | VIC     | -37.45 | 145.80 | 1177 | LakeWetland | 20921YBP(+/-674)  | NA              | 435 | McKenzie, 1997             |
| Tom Burns              | VIC     | -37.38 | 145.82 | 1075 | LakeWetland | 35387YBP(+/-961)  | 853YBP(+/-109)  | 540 | McKenzie, 1997             |
| Chapple Vale Swamp     | VIC     | -38.63 | 143.32 | 30   | LakeWetland | 6697YBP(+/-191)   | NA              | 75  | McKenzie and Kershaw, 1997 |
| Camerons Lagoon        | TAS     | -41.96 | 148.67 | 1045 | LakeWetland | 8593YBP(+/-388)   | NA              | 430 | Thomas and Hope, 1994      |
| Pemerak Swamp          | INDO    | 0.79   | 112.05 | 40   | LakeWetland | 32958YBP(+/-2352) | 292YBP (+/-140) | 40  | Anshari et al., 2001       |
| Goochs Crater Swamp    | NSW     | -33.45 | 150.26 | 960  | LakeWetland | 12190YBP(+/-140)  | NA              | 175 | Black and Mooney, 2006     |
| Tea Tree Swamp         | VIC     | -37.20 | 148.83 | 900  | LakeWetland | 2930YBP(+/-429)   | 10YBP           | 60  | Gell et al., 1993          |
| Micalong Swamp         | NSW     | -35.32 | 148.52 | 980  | LakeWetland | 16000YBP          | NA              | NA  | Kemp and Hope, 2014        |
| Willigobung Swamp      | NSW     | -35.66 | 148.04 | 780  | LakeWetland | 12580YBP(+/-170)  | NA              | 260 | Kemp and Hope, 2014        |
| Brooks Ridge Fen       | NSW     | -36.16 | 148.59 | 1450 | LakeWetland | 1500YBP           | NA              | NA  | Mooney et al., 1997        |
| Saint Louis Lac        | Pacific | -22.23 | 166.55 | 5    | LakeWetland | 7470YBP(+/-200)   | 600YBP(+/-90)   | NA  | Stevenson, 2004            |



|                             |         |        |        |      |             |                  |              |    |                                                  |
|-----------------------------|---------|--------|--------|------|-------------|------------------|--------------|----|--------------------------------------------------|
| Bogong Creek Swamp          | ACT     | -35.75 | 148.95 | 1001 | LakeWetland | 11004YBP(+/-143) | NA           | NA | Hope et al., 2009a                               |
| Rotten Swamp                | ACT     | -35.70 | 148.88 | 1445 | LakeWetland | 6300YBP(+/-90)   | 0YBP         | NA | Hope et al., 2009a                               |
| Cotter Source Bog           | ACT     | -35.97 | 148.82 | 1755 | LakeWetland | 10148YBP(+/-123) | 0YBP         | NA | Hope et al., 2009a                               |
| Ginini Flats                | ACT     | -35.31 | 148.46 | 1590 | LakeWetland | 3395YBP(+/-73)   | NA           | NA | Hope et al., 2009a                               |
| Echo Flat                   | TAS     | -37.47 | 145.87 | 1440 | LakeWetland | 6500YBP          | 0YBP         | NA | Ashton and Hargreaves, 1983                      |
| Rotten Swamp                | ACT     | -35.70 | 148.88 | 1445 | LakeWetland | NA               | NA           | NA | Clark, 1986                                      |
| Soleve                      | Pacific | -17.25 | 179.49 | 2    | LakeWetland | NA               | NA           | NA | Clark and Hope, 1997                             |
| Wingecarribee Swamp         | NSW     | -34.57 | 150.52 | 685  | LakeWetland | NA               | NA           | NA | de Montford, 2008                                |
| Yawi Ti                     | PNG     | -6.61  | 143.89 | 1150 | LakeWetland | NA               | NA           | NA | Haberle, 2007                                    |
| Bonatoa                     | FIJI    | -18.07 | 178.53 | 4    | LakeWetland | 5053YBP(+/-243)  | NA           | NA | Hope et al., 2009b                               |
| Blundells Flat              | NSW     | -35.19 | 148.49 | 762  | LakeWetland | NA               | NA           | NA | Hope et al., 2006b                               |
| Gallaher Swamp              | NSW     | -34.29 | 150.43 | 535  | LakeWetland | NA               | NA           | NA | Hope, 2005a                                      |
| Mulloon Creek Swamp         | NSW     | -35.44 | 149.56 | 799  | LakeWetland | NA               | NA           | NA | Hope, G.S., Unpub.                               |
| Roch Arch Swamp             | NSW     | -34.30 | 150.39 | 575  | LakeWetland | NA               | NA           | NA | Hope, 2005a                                      |
| Snowy Flats                 | NSW     | -35.54 | 148.47 | 1618 | LakeWetland | NA               | NA           | NA | Hope et al., 2005                                |
| Tom Gregory Swamp           | NSW     | -35.38 | 148.49 | 1024 | LakeWetland | NA               | NA           | NA | Hope, 2005b                                      |
| Anumon Swamp                | Pacific | -20.16 | 169.00 | 45   | LakeWetland | NA               | NA           | NA | Hope, 1996b                                      |
| Grey Pole Swamp             | NSW     | -32.61 | 152.32 | 9    | LakeWetland | NA               | NA           | NA | Hom, 2005                                        |
| Wildes Meadow Swamp         | NSW     | -34.62 | 150.51 | 670  | LakeWetland | NA               | NA           | NA | Kodela, 1996                                     |
| South Salvation Creek Swamp | NSW     | -33.63 | 151.26 | 132  | LakeWetland | NA               | NA           | NA | Kodela and Dodson, 1988                          |
| Howes' Waterhole Swamp      | NSW     | -33.02 | 150.67 | 280  | LakeWetland | NA               | NA           | NA | Mason, 2004                                      |
| Queens Swamp                | NSW     | -33.90 | 150.59 | 665  | LakeWetland | NA               | NA           | NA | Mooney, S., Unpub                                |
| Poley Creek                 | VIC     | -37.41 | 145.22 | 630  | LakeWetland | NA               | NA           | NA | Pittock, 1989                                    |
| Ryans Swamp                 | NSW     | -35.09 | 150.39 | 8    | LakeWetland | NA               | NA           | NA | Radclyffe, 1993                                  |
| McKenzie Road Bog           | VIC     | -38.43 | 146.77 | 50   | LakeWetland | NA               | NA           | NA | Robertson, 1986                                  |
| Nursery Swamp               | NSW     | -35.41 | 148.58 | 1092 | LakeWetland | NA               | NA           | NA | Rogers and Hope, 2006                            |
| Jackson's Bog               | NSW     | -37.10 | 149.13 | 750  | LakeWetland | NA               | NA           | NA | Kershaw et al., 1979; Oaks, 1981; Southern, 1982 |
| Plum Swamp                  | Pacific | -22.26 | 166.61 | 40   | LakeWetland | NA               | NA           | NA | Stevenson, 1998                                  |
| Giandarra Bog               | NSW     | -35.80 | 148.48 | 1390 | LakeWetland | NA               | NA           | NA | Thomas, 1991                                     |
| Muellers Rock               | NSW     | -35.39 | 148.50 | 1102 | LakeWetland | NA               | NA           | NA | Worthy et al., 2005                              |
| Upper Snowy Mountains       | NSW     | -36.46 | 148.30 | 1940 | LakeWetland | 6493YBP          | 4YBP         | 16 | Marx et al., 2011                                |
| Upper Ruined Hut Bog        | NZ      | -45.45 | 169.20 | 1420 | LakeWetland | 7779YBP          | 134YBP       | 38 | Marx et al., 2009                                |
| Louisa Creek                | QLD     | -24.87 | 147.18 | 440  | LakeWetland | 917YBP(+/-145)   | NA           | 40 | Bell et al., 1989                                |
| Smelter Creek               | TAS     | -42.12 | 145.15 | 210  | LakeWetland | 13600YBP(+/-202) | NA           | NA | Colhoun et al, 1992                              |
| Thirlmere Lakes             | NSW     | -34.40 | 150.54 | 590  | LakeWetland | NA               | NA           | NA | Rose and Martin, 2007                            |
| Hogan's Island              | TAS     | -39.30 | 147.25 | 1    | LakeWetland | NA               | NA           | NA | Scarlett et al. 1974                             |
| Boambee Creek               | NSW     | -30.32 | 153.07 | 40   | LakeWetland | NA               | NA           | NA | Logan and Taffs, 2013                            |
| Annaburroo Billabong        | NT      | -12.92 | 131.67 | 20   | LakeWetland | 636YBP(+/-46)    | -48YBP(+/-4) | 15 | Zhang et al., 2011                               |

|                                 |     |        |        |     |             |                   |                |      |                              |
|---------------------------------|-----|--------|--------|-----|-------------|-------------------|----------------|------|------------------------------|
| Balranald Weir                  | NSW | -34.66 | 143.50 | 65  | LakeWetland | NA                | NA             | NA   | Gell and Little, 2006        |
| Erskine Creek                   | NSW | -33.85 | 150.50 | 190 | LakeWetland | NA                | NA             | NA   | Metcalf, 1999                |
| Cox River                       | NSW | -33.73 | 150.18 | 432 | LakeWetland | NA                | NA             | NA   | Organo, 2000                 |
| Dalhousie Springs               | SA  | -26.42 | 135.50 | 150 | LakeWetland | 1621YBP(+/-200)   | NA             | NA   | Boyd, 1990                   |
| Griffith Swamp                  | NSW | -33.28 | 151.00 | 15  | LakeWetland | 6300YBP           | -50YBP         | 90   | Mooney et al., 2007          |
| Bobundara Swamp                 | NSW | -36.42 | 150.10 | 5   | LakeWetland | NA                | NA             | NA   | Hope et al., 2006a           |
| Jaffray Swamp                   | SA  | -36.14 | 139.76 | 25  | LakeWetland | NA                | 55YBP          | 200  | Taffs, 2001                  |
| Airport Swamp                   | NSW | -31.54 | 159.08 | 10  | LakeWetland | 2615YBP(+/-130)   | -62YBP         | 1    | Martin et al., 2014          |
| Pinetrees Swamp                 | NSW | -31.50 | 159.08 | 10  | LakeWetland | 5520YBP(+/-50)    | -62YBP         | 1    | Martin et al., 2014          |
| Old Settlement 1                | NSW | -31.50 | 159.08 | 5   | LakeWetland | NA                | -62YBP         | 1    | Martin et al., 2014          |
| Old Settlement 3                | NSW | -31.50 | 159.08 | 5   | LakeWetland | 613YBP(+/-38)     | -62YBP         | 1    | Martin et al., 2014          |
| North Bay H1                    | NSW | -31.50 | 159.08 | 5   | LakeWetland | 485YBP(+/-35)     | -62YBP         | 1    | Martin et al., 2014          |
| Boat Harbour Creek Swamp        | SA  | -35.59 | 138.28 | 290 | LakeWetland | 8218YBP(+/-545)   | 16YBP          | 470  | Bickford and Gell, 2005      |
| Big Scrub                       | NSW | -28.78 | 153.29 | 30  | LakeWetland | 784YBP(+/-135)    | NA             | NA   | Boyd, 1999                   |
| Magela Floodplain               | NT  | -12.50 | 132.80 | 3   | LakeWetland | 4803YBP(+/-233)   | NA             | NA   | Clark and Guppy, 1988        |
| Wyvuri Swamp                    | QLD | -17.30 | 146.00 | 7   | LakeWetland | NA                | NA             | NA   | Crowley and Gagan, 1995      |
| Airport Swamp                   | NSW | -31.54 | 159.08 | 1   | LakeWetland | NA                | NA             | NA   | Dodson, 1982                 |
| Old Settlement Swamp            | NSW | -31.54 | 159.08 | 1   | LakeWetland | NA                | NA             | NA   | Dodson, 1982                 |
| North Stradbroke Island         | QLD | -27.62 | 153.46 | 25  | LakeWetland | NA                | NA             | NA   | Flood, 1984                  |
| Bega Swamp                      | NSW | -36.59 | 149.47 | NA  | LakeWetland | 2740YBP           | 41YBP          | 30   | Haberle, S., Unpub.          |
| Boomer Swamp                    | VIC | -38.20 | 141.30 | 9   | LakeWetland | 7406YBP(+/-200)   | NA             | NA   | Head, 1988                   |
| Long Swamp                      | VIC | -38.1  | 141.10 | 5   | LakeWetland | 6742YBP(+/-238)   | 399YBP(+/-93)  | NA   | Head, 1988                   |
| Shipwreck Rock                  | VIC | -38.1  | 141.10 | 5   | LakeWetland | NA                | NA             | NA   | Head, 1988                   |
| Hidden Swamp - Sperm Whale Head | VIC | -38.04 | 147.59 | 5   | LakeWetland | 7683YBP(+/-254)   | NA             | NA   | Hooley, 1980                 |
| Bromfield Swamp                 | QLD | -17.38 | 145.55 | 752 | LakeWetland | 12210YBP(+/-140)  | 677YBP(+/-112) | 175  | Kershaw, 1975                |
| Killiecrankie Swamp             | BS  | -39.84 | 147.84 | 10  | LakeWetland | 445YBP(+/-289)    | NA             | NA   | Ladd, 1992                   |
| Middle Patriarch Swamp          | BS  | -39.98 | 148.20 | 19  | LakeWetland | 11614YBP(+/-1111) | NA             | NA   | Ladd, 1992                   |
| Delegate River                  | NSW | -37.02 | 148.94 | 740 | LakeWetland | NA                | NA             | 400  | Ladd, 1979a                  |
| Native Companion Lagoon         | QLD | -27.68 | 153.41 | 27  | LakeWetland | 31100YBP          | 640YBP         | 605  | Moss et al., 2013            |
| Tortoise Lagoon                 | QLD | -27.52 | 153.47 | 39  | LakeWetland | 37000YBP          | 0YBP           | 740  | Moss et al., 2013            |
| Welsby Lagoon                   | QLD | -27.44 | 153.45 | 29  | LakeWetland | 26000YBP          | 190YBP         | 295  | Moss et al., 2013            |
| Mua - Tiam Point                | TS  | -10.20 | 142.30 | 3   | LakeWetland | 7630YBP(+/-108)   | 0YBP           | 75   | Rowe, 2007                   |
| Zurath                          | TS  | -10.27 | 142.10 | 3   | LakeWetland | NA                | 0YBP           | 162  | Rowe, 2007                   |
| Waterhouse Marsh                | TAS | -40.85 | 147.65 | 50  | LakeWetland | 12213YBP(+/-495)  | NA             | 655  | Thomas and Kirkpatrick, 1996 |
| Burruga Swamp                   | NSW | -31.92 | 151.42 | 985 | LakeWetland | 2117YBP(+/-190)   | 0YBP           | 68   | Dodson et al., 1994c         |
| Burruga Swamp                   | NSW | -31.92 | 151.42 | 985 | LakeWetland | 42203YBP(+/-837)  | NA             | 1000 | Sweller and Martin, 2001     |
| Bungawalbin Creek               | QLD | -29.11 | 153.22 | 1   | LakeWetland | 7463YBP(+/-126)   | NA             | NA   | McGrath and Boyd, 1998       |
| Bundjalung National Park        | QLD | -29.19 | 153.38 | 10  | LakeWetland | 8460YBP(+/-235)   | NA             | NA   | McGrath and Boyd, 1998       |

|                              |         |        |        |      |             |                 |                 |     |                                                                          |
|------------------------------|---------|--------|--------|------|-------------|-----------------|-----------------|-----|--------------------------------------------------------------------------|
| Magela Floodplain            | NT      | -12.50 | 132.80 | 3    | LakeWetland | 950YBP          | -50YBP          | 40  | Wasson et al., 2007                                                      |
| Tullabardine Dam             | TAS     | -41.70 | 145.68 | 230  | LakeWetland | NA              | 0YBP            | 620 | Colhoun et al., 1986                                                     |
| Ambathala shearing shed      | QLD     | -25.97 | 145.33 | 330  | LakeWetland | 20YBP           | -45YBP          | NA  | Witt et al., 2006                                                        |
| Tooperoopna                  | NSW     | -34.01 | 141.64 | 30   | LakeWetland | NA              | NA              | NA  | Cupper et al., 2000                                                      |
| Nadrau                       | Pacific | -17.75 | 177.88 | 680  | LakeWetland | 2046YBP(+/-122) | NA              | NA  | Hope et al., 2009b                                                       |
| Aire Crossing                | VIC     | -38.65 | 143.48 | 180  | LakeWetland | 9797YBP(+/-352) | NA              | 280 | McKenzie and Kershaw, 2004                                               |
| Badu 15                      | TS      | -10.10 | 142.15 | 20   | LakeWetland | 8930YBP(+/-158) | 0YBP            | 260 | Rowe, 2007                                                               |
| King River                   | TAS     | -42.14 | 145.65 | 200  | LakeWetland | NA              | NA              | 25  | Van der Geer et al., 1991                                                |
| Newall Creek                 | TAS     | -42.07 | 145.44 | 140  | LakeWetland | NA              | NA              | NA  | Van der Geer et al., 1989                                                |
| Robe                         | SA      | -37.22 | 139.81 | <10  | LakeWetland | 9210YBP(+/-230) | 2000YBP(+/-160) | NA  | Cann et al., 1999                                                        |
| Ngardmau                     | Pacific | 7.61   | 134.57 | 10   | LakeWetland | NA              | NA              | NA  | Athens and Ward, 2005                                                    |
| Ngerchau                     | Pacific | 7.63   | 134.52 | 9    | LakeWetland | NA              | NA              | NA  | Athens and Ward, 2005                                                    |
| Hgerdok                      | Pacific | 7.52   | 134.60 | 25   | LakeWetland | NA              | NA              | NA  | Athens and Ward, 2005                                                    |
| Nekkeng                      | Pacific | 7.45   | 134.52 | 9    | LakeWetland | NA              | NA              | NA  | Athens and Ward, 2005                                                    |
| Ngerkell                     | Pacific | 7.61   | 134.63 | 10   | LakeWetland | NA              | NA              | NA  | Athens and Ward, 2005                                                    |
| Olbed 1                      | Pacific | 7.50   | 134.54 | 20   | LakeWetland | NA              | NA              | NA  | Athens and Ward, 2005                                                    |
| Yano                         | Pacific | 7.38   | 134.54 | 40   | LakeWetland | NA              | NA              | NA  | Athens and Ward, 2005                                                    |
| Rennix Gap                   | NSW     | -36.22 | 148.30 | 1570 | LakeWetland | NA              | NA              | NA  | Hope, G.S., Unpub.                                                       |
| Wangil - Aru                 | INDO    | -5.92  | 134.20 | 1    | LakeWetland | 7725 YBP(+/-75) | 0YBP            | 40  | Hope and Aplin, 2005                                                     |
| Boulder Flat                 | VIC     | -37.45 | 148.92 | 25   | LakeWetland | NA              | NA              | NA  | Kenyon, 1989                                                             |
| Loveday Wetland              | SA      | -34.25 | 140.24 | 20   | LakeWetland | NA              | NA              | NA  | Gell et al, 2007                                                         |
| Loch Luna                    | SA      | -34.25 | 140.24 | 20   | LakeWetland | 200YBP          | NA              | NA  | Gell et al, 2007                                                         |
| Bonneys Camp                 | SA      | -36.14 | 139.76 | 25   | LakeWetland | NA              | 55YBP           | 30  | Taffs, 2001                                                              |
| Reedy Lake                   | SA      | -36.14 | 139.76 | 25   | LakeWetland | NA              | 55YBP           | NA  | Taffs, 2001                                                              |
| Billabong 21                 | VIC     | -36.75 | 145.51 | 172  | LakeWetland | NA              | NA              | NA  | Ogden, 2000                                                              |
| Billabong 23                 | VIC     | -36.75 | 145.51 | 172  | LakeWetland | NA              | NA              | NA  | Ogden, 2000                                                              |
| Billabong 25                 | VIC     | -36.75 | 145.51 | 172  | LakeWetland | NA              | NA              | NA  | Ogden, 2000                                                              |
| Billabong 32                 | VIC     | -36.00 | 145.98 | 133  | LakeWetland | NA              | NA              | NA  | Ogden, 2000                                                              |
| Billabong 38                 | VIC     | -35.80 | 145.57 | 112  | LakeWetland | NA              | NA              | NA  | Ogden, 2000                                                              |
| Billabong 9                  | VIC     | -35.75 | 147.75 | 492  | LakeWetland | NA              | NA              | NA  | Ogden, 2000                                                              |
| Kingston Common              | NSW     | -29.05 | 167.95 | 2    | LakeWetland | 6176YBP(+/-427) | NA              | NA  | Macphail et al., 2001; Macphail and Hope, 1997; Macphail and Neale, 1996 |
| Baw Baw                      | VIC     | -37.85 | 146.27 | 1524 | LakeWetland | NA              | NA              | NA  | Strickland, 1980                                                         |
| Bomen Lagoon                 | NSW     | -35.00 | 147.01 | 168  | LakeWetland | NA              | NA              | NA  | Gell and Little, 2006                                                    |
| Berry Jerry Lagoon           | NSW     | -35.02 | 147.06 | 175  | LakeWetland | NA              | NA              | NA  | Gell and Little, 2006                                                    |
| Yanco Agricultural High Weir | NSW     | -34.63 | 146.39 | 142  | LakeWetland | NA              | NA              | NA  | Gell and Little, 2006                                                    |
| Coonancoocabil Lagoon        | NSW     | -34.62 | 146.29 | 140  | LakeWetland | NA              | NA              | NA  | Gell and Little, 2006                                                    |
| Gooragool Lagoon             | NSW     | -34.58 | 146.10 | 130  | LakeWetland | NA              | NA              | NA  | Gell and Little, 2006                                                    |
| McKenna's Lagoon             | NSW     | -34.42 | 145.51 | 105  | LakeWetland | NA              | NA              | NA  | Gell and Little, 2006                                                    |

|                             |         |        |         |       |             |                   |                 |      |                                        |
|-----------------------------|---------|--------|---------|-------|-------------|-------------------|-----------------|------|----------------------------------------|
| Homestead Lagoon            | NSW     | -34.54 | 145.74  | 125   | LakeWetland | NA                | NA              | NA   | Gell and Little, 2006                  |
| Ajax Achilles               | SA      | -34.33 | 140.58  | 20    | LakeWetland | NA                | NA              | NA   | Gell et al., 2009                      |
| Byron Bay                   | NSW     | -28.63 | Boulder | 10    | LakeWetland | NA                | NA              | NA   | Logan, 2003                            |
| Crystal Bog                 | VIC     | -36.73 | 146.78  | 1350  | LakeWetland | NA                | NA              | NA   | Williams, 1980                         |
| Bunyip Swamp                | VIC     | -36.69 | 146.77  | 1300  | LakeWetland | NA                | NA              | NA   | Binder and Kershaw, 1978               |
| Anbangbang 1 and Djuwarr 1  | NT      | -13.00 | 133.00  | 320   | LakeWetland | NA                | NA              | NA   | Clark, 1985                            |
| Tanyaka Creek               | SA      | -34.23 | 140.77  | 20    | LakeWetland | NA                | NA              | NA   | Fluin and Gell, 2008                   |
| Mundic Wetland              | SA      | -34.21 | 140.79  | 20    | LakeWetland | NA                | NA              | NA   | Fluin and Gell, 2008                   |
| Tawonga Bog                 | VIC     | -36.68 | 147.40  | NA    | LakeWetland | NA                | NA              | NA   | Kershaw and Green, 1983, Rowe, 1968    |
| Fingal Bay                  | NSW     | -32.74 | 152.17  | 4     | LakeWetland | NA                | NA              | NA   | Macphail, 1973                         |
| Lake Kwornicup              | WA      | -32.13 | 115.73  | 10    | LakeWetland | NA                | NA              | NA   | Morris, 1996                           |
| Ki'ina                      | NT      | -12.85 | 132.55  | 1     | LakeWetland | NA                | NA              | NA   | Russell-Smith, 1985; Hope et al., 1985 |
| Lake Osborne                | TAS     | -43.21 | 146.76  | 924   | LakeWetland | 6452YBP           | -61YBP          | 33   | Fletcher et al., 2014                  |
| Mount Quincan               | QLD     | -17.30 | 145.58  | 730   | LakeWetland | 6900YBP           | NA              | 8    | Burrows et al., 2014                   |
| Wombat Pool                 | TAS     | -41.67 | 145.96  | 1057  | LakeWetland | 17055YBP          | -61YBP          | 113  | Stahle et al., 2016                    |
| Vunimoli                    | Pacific | -18.22 | 177.88  | 251   | LakeWetland | 2820YBP           | NA              | NA   | Hope et al., 1999; Hope et al., 2009b  |
| Waitabu                     | Pacific | -18.23 | 178.78  | 43    | LakeWetland | NA                | NA              | NA   | Latham et al., 1983                    |
| Western Sumatra             | INDO    | -0.78  | 99.90   | -517  | Marine      | 45330YBP          | 60YBP           | 47   | Mohtadi et al., 2014                   |
| GeoB10065-7 - Sunda Islands | INDO    | -9.23  | 118.90  | -1296 | Marine      | 5956YBP(+/-149)   | -54YBP(+/-6)    | 10   | Steinke et al., 2014                   |
| G5-2-056P                   | INDO.   | -3.58  | 132.18  | -2113 | Marine      | 14700YBP          | 0YBP            | 20   | Brijker et al., 2007                   |
| MD9821-60 - Makassar Strait | INDO.   | -5.20  | 117.49  | -1185 | Marine      | 946YBP            | 110YBP          | 10   | Newton et al., 2006                    |
| MD98-2177 - Makassar Strait | INDO.   | 1.40   | 119.08  | -968  | Marine      | 1949YBP           | -42YBP          | 20   | Newton et al., 2011                    |
| MD98-2176                   | INDO.   | -5.01  | 133.43  | -2382 | Marine      | 21010YBP          | 126YBP          | 34   | Stott et al., 2004; Stott et al., 2007 |
| MD98-2181                   | INDO.   | 6.45   | 125.83  | -2114 | Marine      | 21869YBP          | 3YBP            | 33   | Stott et al., 2004; Stott et al., 2007 |
| Makassar Strait             | INDO.   | -5.20  | 117.48  | -480  | Marine      | 2316YBP           | -37YBP          | 10   | Oppo et al., 2009                      |
| 13GGC - Makasaar Strait     | INDO.   | -7.37  | 119.40  | -594  | Marine      | 10575YBP          | 123YBP          | 38   | Linsley et al., 2010                   |
| Murray River                | SA      | -35.52 | 138.79  | 0     | Marine      | NA                | NA              | 275  | Cann et al., 2000                      |
| Murray Canyon               | SA      | -37.26 | 137.36  | -2420 | Marine      | 32513YBP          | 0YBP(+53)       | 40   | Moros et al, 2009                      |
| Gulf of St Vincent          | SA      | -35.23 | 138.02  | -40   | Marine      | 38657YBP(+/-1118) | 1560YBP(+/-220) | NA   | Cann et al, 2006                       |
| Apollo Bay                  | TAS     | -43.15 | 147.28  | 0     | Marine      | 30YBP             | -52YBP          | 8    | Edgar and Samson, 2004                 |
| Birchs Bay                  | TAS     | -43.17 | 147.25  | 0     | Marine      | 55YBP             | -52YBP          | 8    | Edgar and Samson, 2004                 |
| Geilston Bay                | TAS     | -42.84 | 147.34  | -9    | Marine      | 50YBP             | -50YBP          | 20   | Edgar and Samson, 2004                 |
| Kangaroo Bay                | TAS     | -42.88 | 147.36  | 14.5  | Marine      | 50YBP             | -50YBP          | 20   | Edgar and Samson, 2004                 |
| Makassar Strait             | INDO.   | -3.88  | 119.45  | -460  | Marine      | 2281YBP           | -48YBP          | 33   | Tierney et al., 2010                   |
| Banda Sea                   | INDO    | -5.77  | 126.97  | -3163 | Marine      | 168000YBP         | 0YBP            | 2200 | Van der Kaars et al., 2000             |
| Core Fr10/95-GC-17          | INDO    | -22.05 | 113.50  | -1093 | Marine      | 100000YBP         | 0YBP            | NA   | Van der Kaars and De Deckker, 2002     |
| Core E55-6                  | VIC     | -38.51 | 141.01  | -55   | Marine      | 125000YBP         | 0YBP            | NA   | Harle, 1997                            |
| MD-28                       | QLD     | -11.19 | 139.96  | -62   | Marine      | NA                | 410YBP          | NA   | Chivas et al., 2001                    |

|                     |         |        |        |       |               |                     |                   |      |                                      |
|---------------------|---------|--------|--------|-------|---------------|---------------------|-------------------|------|--------------------------------------|
| MD-29               | QLD     | -10.79 | 138.72 | -60   | Marine        | NA                  | 11200YBP          | NA   | Chivas et al., 2001                  |
| MD-30               | QLD     | -12.27 | 138.75 | -60   | Marine        | NA                  | 12094YBP          | NA   | Chivas et al., 2001                  |
| MD-31               | QLD     | -12.07 | 138.75 | -59   | Marine        | 12020YBP            | 7420YBP           | NA   | Chivas et al., 2001                  |
| MD-32               | QLD     | -12.31 | 139.98 | -64   | Marine        | 125000YBP(+/-12000) | NA                | NA   | Chivas et al., 2001                  |
| MD-33               | QLD     | -12.39 | 140.34 | -68   | Marine        | 18570YBP            | 17120YBP          | NA   | Chivas et al., 2001                  |
| G4-K4P1             | INDO    | -0.95  | 127.75 | NA    | Marine        | NA                  | NA                | NA   | Van der Kaars, 1989                  |
| G4-K4P3             | INDO    | -0.97  | 127.75 | NA    | Marine        | NA                  | NA                | NA   | Van der Kaars, 1989                  |
| G6-2 Argo Abyssal   | INDO    | -12.47 | 118.57 | NA    | Marine        | NA                  | NA                | NA   | Van der Kaars, 1989                  |
| AIMS1260            | QLD     | -19.30 | 147.35 | -14   | Marine        | -10YBP(+/-5)        | -46YBP(+/-0)      | 2    | Cavanagh et al., 1999                |
| AIMS1262            | QLD     | -18.41 | 146.17 | -5    | Marine        | NA                  | NA                | NA   | Cavanagh et al., 1999                |
| AIMS1450            | QLD     | -18.53 | 146.38 | -10   | Marine        | -11YBP(+/-16)       | -46YBP(+/-0)      | 1    | Cavanagh et al., 1999                |
| Offshore Borneo     | INDO    | -9.23  | 118.90 | -1296 | Marine        | 34368YBP(+/-225)    | 0YBP              | 120  | Dubois et al., 2014                  |
| Lombok Ridge        | INDO    | -10.78 | 118.07 | -3510 | Marine        | 290000YBP           | 0YBP              | 1500 | Wang et al., 1999                    |
| MD97-2140           | Pacific | 2.07   | 142.27 | -2547 | Marine        | 360000              | 0YBP              | 1900 | Thevenon et al., 2004                |
| Adelie Land         | ANT     | -66.05 | 138.56 | -746  | Marine        | 10843YBP            | 1000YBP           | 15   | Crosta et al., 2007                  |
| Kau Bay             | INDO.   | 1.00   | 127.50 | -377  | Marine        | 3332YBP             | 180YBP            | 50   | Langton et al., 2008                 |
| Wet Cave            | SA      | -37.10 | 140.80 | 95    | Speleothem    | 60000YBP(+/-1)      | -50YBP(+/-1)      | NA   | Macken et al., 2013                  |
| Blanch Cave         | SA      | -37.10 | 140.80 | 95    | Speleothem    | 60000YBP(+/-1)      | -50YBP(+/-1)      | NA   | Macken et al., 2013                  |
| Niue Island         | Pacific | -19.00 | 169.80 | 65    | Speleothem    | 195YBP              | -52YBP(+/-0)      | 1    | Rasbury and Aharon, 2006             |
| Gunung Buda         | INDO.   | 4.03   | 114.80 | 150   | Speleothem    | 26430YBP            | 0YBP              | 65   | Partin et al., 2007                  |
| Liang Luar          | INDO.   | -8.32  | 120.43 | 550   | Speleothem    | 12649YBP(+/-120)    | -52YBP(+/-4)      | 8    | Griffiths et al., 2009               |
| Liang Luar          | INDO.   | -8.32  | 120.43 | 550   | Speleothem    | 23800YBP(+/-500)    | 50YBP(+/-10)      | 100  | Ayliffe et al., 2013                 |
| Chillagoe Cave      | QLD     | -17.20 | 144.51 | 409   | Speleothem    | 724YBP              | -53YBP            | 1    | Haig et al., 2014; Nott et al., 2007 |
| KNI-51 (Kimberley)  | WA      | -15.30 | 128.62 | 100   | Speleothem    | 8727YBP(+/-172)     | -60YBP(+/-1)      | 15   | Denniston et al., 2013               |
| Cape Range          | WA      | -22.07 | 113.98 | 206   | Speleothem    | 1439YBP             | -53YBP            | 1    | Haig et al., 2014                    |
| Moondyne            | WA      | -34.20 | 115.05 | 120   | Speleothem    | 39YBP               | -42YBP            | 1    | Treble et al., 2005                  |
| Taurius Cave        | Pacific | -15.50 | 167.00 | 230   | Speleothem    | 391YBP(+/-12)       | -55YBP(+/-0)      | 1    | Partin et al., 2013                  |
| Forestry Cave       | Pacific | -9.49  | 159.97 | 200   | Speleothem    | 527YBP(+/-8.8)      | -60YBP(+/-9)      | 1    | Maupin et al., 2014                  |
| Shoalhaven River    | NSW     | -34.85 | 150.75 | 10    | Geomorphology | 7800YBP (+/-55)     | 2340YBP(+/-90)    | NA   | Umitsu et al., 2001                  |
| Gulf of Carpentaria | QLD     | -15.21 | 141.64 | 10    | Geomorphology | 5950YBP(+/-95)      | 47YBP (+/-1)      | NA   | Rhodes et al., 1980                  |
| Ramsay Bay          | QLD     | -18.28 | 146.27 | 20    | Geomorphology | 5850YBP(+/-110)     | 810YBP(+/-110)    | NA   | Pye and Rhodes, 1985                 |
| Crowley Beach       | QLD     | -17.65 | 146.14 | 6.5   | Geomorphology | 5685YBP(+/-400)     | 145YBP(+/-10)     | NA   | Nott et al., 2009                    |
| Lady Elliot Island  | QLD     | -24.11 | 152.71 | 5     | Geomorphology | 3230YBP(+/-90)      | 0YBP(+/-70)       | NA   | Chivas et al., 1986                  |
| Beachmere           | QLD     | -27.09 | 153.09 | 1     | Geomorphology | 2600YBP(+/-130)     | 140YBP(+/-50)     | NA   | Brooke et al., 2008a                 |
| Lake Blanche        | SA      | -29.30 | 139.50 | 8     | Geomorphology | 26200YBP(+/-3000)   | 1700YBP(+/-600)   | NA   | Nanson et al., 1998                  |
| Lake Frome          | SA      | -30.30 | 139.80 | 25    | Geomorphology | 69600YBP(+/-2600)   | 54900YBP(+/-4800) | NA   | Nanson et al., 1998                  |
| Lake Callabonna     | SA      | -29.80 | 140.10 | 6     | Geomorphology | 2200YBP(+/-200)     | 1000YBP(+/-200)   | NA   | Nanson et al., 1998                  |
| Lake Eyre South     | SA      | -29.30 | 137.50 | 12    | Geomorphology | 70000YBP(+/-15400)  | 26200YBP(+/-3700) | NA   | Nanson et al., 1998                  |

|                        |     |        |        |           |               |                     |                 |    |                               |
|------------------------|-----|--------|--------|-----------|---------------|---------------------|-----------------|----|-------------------------------|
| Le Fevre               | SA  | -34.81 | 138.49 | 5         | Geomorphology | 7890YBP(+/-460)     | 610YBP(+/-90)   | NA | Bowman and Harvey, 1986       |
| Murray River           | SA  | -35.60 | 139.00 | Various   | Geomorphology | 329000YBP           | 2620YBP(+/-160) | NA | Bourman et al., 2000          |
| Guichen Bay            | SA  | -37.16 | 139.76 | 5         | Geomorphology | 5400YBP(+/-230)     | 1800YBP(+/-80)  | NA | Bristow and Pucillo, 2006     |
| Tirari Desert          | SA  | -28.06 | 137.61 | Various   | Geomorphology | 87500YBP(+/-5300)   | 190YBP(+/-20)   | NA | Fitzsimmons et al., 2007      |
| Strzelecki Desert      | SA  | -27.00 | 140.00 | Various   | Geomorphology | 186000YBP(+/-10000) | 120YBP(+/-20)   | NA | Fitzsimmons et al., 2007      |
| Ross River             | NT  | -23.75 | 133.50 | Various   | Geomorphology | 9200YBP(+/-900)     | 695YBP(+/-60)   | NA | Patton et al., 1993           |
| Lake George            | NSW | -35.00 | 149.42 | 600       | Geomorphology | 14100YBP(+/-900)    | 130YBP(+/-20)   | NA | Fitzsimmons and Barrows, 2010 |
| Snowy Mountains        | NSW | -36.00 | 148.00 | 1100-2100 | Geomorphology | 31000YBP(+/-2300)   | 120YBP          | NA | Costin, 1972                  |
| Cape Arnhem            | NT  | -12.35 | 136.97 | NA        | Geomorphology | 15200YBP(+/-2100)   | 2700YBP(+/-300) | NA | Lees et al., 1995             |
| Voli Voli              | NZ  | -18.16 | 177.49 | 2         | Geomorphology | 2680YBP(+/-180)     | 220YBP(+/-80)   | NA | Dickinson et al., 1998        |
| Keppel Bay             | QLD | -23.42 | 150.80 | 2         | Geomorphology | 1460YBP(+/-125)     | 60YBP           | NA | Brooke et al., 2008b          |
| Lake Callabonna        | SA  | -29.56 | 140.70 | 2         | Geomorphology | 199000YBP(+/-22000) | 1050YBP(+/-70)  | NA | Cohen et al., 2012            |
| Lake Callabonna        | SA  | -29.56 | 140.70 | 4         | Geomorphology | 27200YBP(+/-2500)   | 900YBP(+/-100)  | NA | Gliganic et al., 2014         |
| Cape St Lambert        | WA  | -13.92 | 127.08 | NA        | Geomorphology | 13400YBP(+/-1000)   | 400YBP(+/-200)  | NA | Lees et al., 1992             |
| Victoria Delta         | WA  | -14.87 | 128.87 | NA        | Geomorphology | 6310YBP(+/-90)      | 660YBP(+/-225)  | NA | Lees, 1992                    |
| Groote Eylandt         | NT  | -13.91 | 136.79 | NA        | Geomorphology | 136000YBP(+/-17000) | 220YBP(+/-1680) | NA | Shulmeister and Lees, 1992    |
| Rosie Creek            | QLD | -15.44 | 136.13 | Various   | Geomorphology | 58400YBP(+/-6600)   | 5900YBP(+/-700) | NA | Nott et al., 1999             |
| North Stomatolite Lake | SA  | -36.17 | 139.66 | 1         | Geomorphology | 7070YBP(+/-95)      | 5620YBP(+/-40)  | NA | Mee et al., 2007              |
| Old Man Lake           | SA  | -37.26 | 139.82 | 2         | Geomorphology | 7660YBP(+/-55)      | 700YBP(+/-30)   | NA | Mee et al., 2007              |
| Lake Amy               | SA  | -37.21 | 139.78 | 3         | Geomorphology | 4580YBP(+/-70)      | 505YBP(+/-20)   | NA | Mee et al., 2007              |
| Naas River             | ACT | -35.72 | 149.08 | 1300-600  | Geomorphology | 14000YBP(+/-2150)   | 360YBP(+/-40)   | NA | Eriksson et al., 2006         |
| Bellinger River        | NSW | -30.47 | 152.48 | Various   | Geomorphology | 20103YBP(+/-147)    | 182YBP(+/-52)   | NA | Cohen et al., 2008            |
| Macquarie Marshes      | NSW | -30.59 | 147.69 | Various   | Geomorphology | 59000YBP(+/-10000)  | 240YBP(+/-90)   | NA | Yonge and Hesse, 2009         |
| Manning River          | NSW | -31.89 | 152.41 | Various   | Geomorphology | 400YBP(+/-70)       | 346YBP(+/-70)   | NA | Nanson, 1986                  |
| Clyde River            | NSW | -35.69 | 150.17 | Various   | Geomorphology | 2650YBP(+/-90)      | 820YBP(+/-70)   | NA | Nanson, 1986                  |
| Wangrah Creek          | NSW | -35.90 | 149.25 | 1300      | Geomorphology | 34166YBP(+/-1100)   | 0YBP            | NA | Prosser et al., 1994          |
| Barmah Choke           | NSW | -36.00 | 145.00 | 100       | Geomorphology | 19080YBP(+/-1040)   | 550YBP(+/-30)   | NA | Stone, 2006                   |
| Wolumla Creek          | NSW | -36.75 | 149.79 | 100-200   | Geomorphology | 5590YBP(+/-80)      | 1410YBP(+/-40)  | NA | Fryirs and Brierley, 1998     |
| Widden Brook           | NSW | -32.50 | 150.35 | Various   | Geomorphology | 16699YBP(+/-565)    | 241YBP(+/-18)   | NA | Cheetham et al., 2010         |
| Mulloon Creek          | NSW | -35.33 | 149.59 | Various   | Geomorphology | 12528YBP(+/-89)     | 3440YBP(+/-90)  | NA | Johnston and Brierley, 2006   |
| Lake Illawarra         | NSW | -34.50 | 150.86 | 0.5       | Geomorphology | 786YBP(+/-97)       | 0YBP            | NA | Chenhall et al., 1995         |
| Lake Illawarra         | NSW | -34.50 | 150.86 | 0.5       | Geomorphology | 7600YBP(+/-340)     | 40YBP(+/-10)    | NA | Sloss et al., 2005            |
| Woody Bay - Iluka      | NSW | -29.35 | 153.36 | 5         | Geomorphology | 4753YBP(+/-245)     | 345YBP(+/-42)   | NA | Goodwin et al., 2006          |
| Fitzroy River          | WA  | -18.03 | 125.75 | NA        | Geomorphology | 1685YBP(+/-153)     | 398YBP(+/-102)  | NA | Wohl et al., 1994             |
| Margaret River         | WA  | -18.43 | 126.58 | NA        | Geomorphology | 1474YBP(+/-144)     | 146YBP(+/-146)  | NA | Wohl et al., 1994             |
| Katherine River        | NT  | -14.29 | 132.39 | 100       | Geomorphology | 2219YBP(+/-133)     | 0YBP            | NA | Sandercock and Wyrwoll, 2005  |
| Windjana Gorge         | WA  | -17.41 | 124.94 | 100       | Geomorphology | 2910YBP(+/-1040)    | 1530YBP(+/-760) | NA | Gillieson et al., 1991        |
| Cairns Region          | QLD | -16.92 | 145.78 | Various   | Geomorphology | 88000YBP(+/-6000)   | 330YBP(+/-30)   | NA | Thomas et al., 2007           |

|                              |     |        |        |         |               |                  |                |     |                                        |
|------------------------------|-----|--------|--------|---------|---------------|------------------|----------------|-----|----------------------------------------|
| Nambucca River               | NSW | -30.59 | 152.71 | Various | Geomorphology | NA               | NA             | NA  | Doyle, 2003                            |
| Shark Bay                    | WA  | -26.39 | 114.16 | 6       | Geomorphology | 3960YBP(+/-77)   | 595YBP(+/-45)  | NA  | Jahnert et al., 2012                   |
| Davys Creek                  | NSW | -33.50 | 148.66 | Various | Geomorphology | 1615YBP(+/-75)   | 155YBP(+/-155) | NA  | Carthew and Drysdale, 2003             |
| Georges River                | NSW | -33.98 | 151.08 | NA      | Geomorphology | NA               | NA             | NA  | Napoli, 1996                           |
| Eurunderee                   | NSW | -32.50 | 152.33 | NA      | Geomorphology | NA               | NA             | NA  | Thom et al., 1978                      |
| Fens, Port Stephens          | NSW | -32.60 | 152.26 | NA      | Geomorphology | NA               | NA             | NA  | Thom et al., 1978                      |
| Newcastle Bight              | NSW | -32.87 | 151.81 | NA      | Geomorphology | NA               | NA             | NA  | Thom et al., 1978                      |
| Woy Woy                      | NSW | -33.53 | 151.33 | NA      | Geomorphology | NA               | NA             | NA  | Thom et al., 1978                      |
| Bherwerre                    | NSW | -35.16 | 150.66 | NA      | Geomorphology | NA               | NA             | NA  | Thom et al., 1978                      |
| Moruya                       | NSW | -35.87 | 150.15 | NA      | Geomorphology | NA               | NA             | NA  | Thom et al., 1978                      |
| Wonboyn                      | NSW | -37.26 | 149.95 | NA      | Geomorphology | NA               | NA             | NA  | Thom et al., 1978                      |
| Adelaide River               | NT  | -12.22 | 131.22 | 0       | Geomorphology | NA               | NA             | NA  | Iles, 1998                             |
| Ki'ina                       | NT  | -12.85 | 132.55 | 1       | Geomorphology | NA               | NA             | NA  | Russell-Smith, 1985; Hope et al., 1985 |
| Eighteen Mile Swamp          | QLD | -27.62 | 153.46 | 8       | Geomorphology | NA               | NA             | NA  | Boyd, 1993                             |
| Ambathala shearing shed      | QLD | -25.97 | 145.33 | 330     | Geomorphology | 20YBP            | -45YBP         | NA  | Witt et al., 2006                      |
| Coorong Calcrete             | SA  | -36.00 | 139.00 | 0       | Geomorphology | NA               | NA             | NA  | Ahmad, 1996                            |
| Clark's Junction             | NZ  | -45.72 | 170.11 | 520     | LakeWetland   | NA               | NA             | NA  | McGlone, 2001                          |
| Potters Bog                  | NZ  | NA     | NA     | 1200    | LakeWetland   | NA               | NA             | NA  | McGlone, 2001                          |
| Pomahaka Road                | NZ  | -46.00 | 169.20 | 875     | LakeWetland   | NA               | NA             | NA  | McGlone, 2001                          |
| Teviot Swamp                 | NZ  | NA     | NA     | 980     | LakeWetland   | NA               | NA             | NA  | McGlone, 2001                          |
| Ajax Bog                     | NZ  | -46.42 | 169.29 | 650     | LakeWetland   | NA               | NA             | NA  | McGlone, 2009                          |
| Travis Swamp                 | NZ  | -43.40 | 172.69 | 2       | LakeWetland   | NA               | NA             | NA  | McGlone, 2009                          |
| Pleasant River               | NZ  | -45.50 | 173.70 | 5       | LakeWetland   | NA               | NA             | NA  | McGlone, 2001                          |
| Kettlehole Bog               | NZ  | -43.05 | 171.79 | 600     | LakeWetland   | 16340YBP(+/-520) | 0YBP           | 195 | McGlone et al., 2004                   |
| Glendhu Bog                  | NZ  | -45.84 | 169.73 | 600     | LakeWetland   | 12000YBP         | -40YBP         | NA  | McGlone and Wilmshurst, 1999           |
| Kohuora                      | NZ  | -36.57 | 174.52 | 73      | LakeWetland   | 32000YBP         | NA             | 100 | Newnham et al., 2007                   |
| Waikaremoana                 | NZ  | -38.45 | 177.02 | 582     | LakeWetland   | 1850YBP(+/-10)   | 0YBP           | 100 | Newnham et al., 1998                   |
| Lake Pupke                   | NZ  | -37.31 | 175.28 | 130     | LakeWetland   | 7040             | 0YBP           | 11  | Heyng et al., 2012                     |
| Tokerau Beach                | NZ  | -34.90 | 173.40 | 3       | Geomorphology | 4935YBP (+/-100) | 341YBP(+/-44)  | NA  | Brook, 1999a                           |
| Te Werahi                    | NZ  | -34.40 | 172.60 | NA      | Geomorphology | 4703YBP(+/-170)  | 462YBP(+/-87)  | NA  | Brook, 1999b                           |
| Lake Tauanui                 | NZ  | -35.50 | 175.86 | 230     | LakeWetland   | 4165YBP(+/-174)  | 0YBP           | 105 | Elliot et al., 1998                    |
| Harataonga                   | NZ  | -36.17 | 175.50 | 15      | LakeWetland   | 6000YBP          | 0YBP           | 520 | Horrocks et al., 2002                  |
| Mt. Hauhungatahi - Site 1020 | NZ  | -39.20 | 175.40 | 1000    | LakeWetland   | NA               | NA             | NA  | Horrocks and Ogden, 1998               |
| Mt. Hauhungatahi - Site 1140 | NZ  | -39.20 | 175.40 | 1150    | LakeWetland   | NA               | NA             | NA  | Horrocks and Ogden, 1998               |
| Mt. Hauhungatahi - Site 1170 | NZ  | -39.20 | 175.40 | 1200    | LakeWetland   | NA               | NA             | NA  | Horrocks and Ogden, 1998               |
| Gibsons's Swamp              | NZ  | -39.42 | 175.42 | 810     | LakeWetland   | NA               | NA             | NA  | Horrocks and Ogden, 1998               |
| Gray's Swamp                 | NZ  | -36.21 | 175.47 | 10      | LakeWetland   | 7000YBP          | 0YBP           | NA  | Horrocks et al., 1999                  |
| Curreen's Paddock            | NZ  | -36.21 | 175.47 | 0       | LakeWetland   | 6870YBP(+/-110)  | 0YBP           | NA  | Horrocks et al., 1999                  |

|                         |    |        |        |     |               |                    |              |     |                                         |
|-------------------------|----|--------|--------|-----|---------------|--------------------|--------------|-----|-----------------------------------------|
| Awana Swamp             | NZ | -36.20 | 175.47 | 3   | LakeWetland   | NA                 | NA           | NA  | Horrocks et al., 2000a                  |
| Kaitoke Swamp           | NZ | -36.23 | 175.44 | 1   | LakeWetland   | 7295YBP(+/-75)     | 0YBP         | NA  | Horrocks et al., 2000c                  |
| Police Station Swamp    | NZ | -36.24 | 175.45 | 5   | LakeWetland   | 5200YBP            | 0YBP         | NA  | Horrocks et al., 2000c                  |
| Forsythes' Paddock      | NZ | -36.26 | 175.47 | 1   | LakeWetland   | 7500YBP            | 0YBP         | NA  | Horrocks et al., 2000b                  |
| Blackwells' Bush        | NZ | -36.24 | 175.47 | 1   | LakeWetland   | 3000YBP            | 0YBP         | NA  | Horrocks et al., 2000b                  |
| Lake Pupuke             | NZ | -36.79 | 175.77 | 5   | LakeWetland   | 9500YBP            | NA           | NA  | Horrocks et al., 2005                   |
| Lake Pupuke             | NZ | -36.79 | 175.77 | 5   | LakeWetland   | 7110YBP            | 1320YBP      | 23  | Heyng et al., 2015                      |
| Lake Pupuke             | NZ | -36.79 | 175.77 | 5   | LakeWetland   | 134YBP             | -50YBP       | 5   | Augustinus et al., 2006                 |
| Northern Awana          | NZ | -36.20 | 175.47 | NA  | LakeWetland   | 650YBP             | 500YBP       | NA  | Horrocks et al., 2001                   |
| Curreen's Gate          | NZ | -36.21 | 175.47 | NA  | LakeWetland   | 700YBP             | 550YBP       | NA  | Horrocks et al., 2001                   |
| Kaitoke Tongue          | NZ | -36.23 | 175.44 | NA  | LakeWetland   | 1000YBP            | 0YBP         | NA  | Horrocks et al., 2001                   |
| Rangihoua               | NZ | -35.17 | 174.08 | 2   | LakeWetland   | 7400YBP            | 0YBP         | NA  | Horrocks, 2007                          |
| NZ rivers               | NZ | NA     | NA     | NA  | Geomorphology | 1764YBP            | -34YBP       | NA  | Grant, 1985                             |
| Waatarua wetland        | NZ | -36.90 | 174.82 | 40  | LakeWetland   | 6000YBP            | NA           | NA  | Horrocks et al., 2002a                  |
| Lake Maratoto           | NZ | -37.88 | 175.30 | 52  | LakeWetland   | 16300YBP (+/-250)  | NA           | NA  | Green and Lowe, 1985                    |
| Lake Tutira             | NZ | -39.23 | 176.89 | 150 | LakeWetland   | 7200YBP            | NA           | NA  | Page, 2010                              |
| Lake Tutira             | NZ | -39.23 | 176.89 | 150 | LakeWetland   | 6800YBP            | 36YBP(+/-36) | 100 | Eden and Page, 1998; Gomez et al., 2012 |
| Lake Tutira             | NZ | -39.23 | 176.89 | 150 | LakeWetland   | 1939YBP            | NA           | NA  | Wilmshurst et al., 1997                 |
| Lake Poukawa            | NZ | -39.78 | 176.72 | 20  | LakeWetland   | 113000YBP(+/-7000) | 1800YBP      | NA  | Carter, 2002                            |
| Lake Poukawa            | NZ | -39.78 | 176.72 | 20  | LakeWetland   | 6500YBP            | NA           | NA  | McGlone, 2002a                          |
| Lake Poukawa            | NZ | -39.78 | 176.72 | 20  | LakeWetland   | 3700YBP            | 0YBP         | 113 | Harper et al., 1986                     |
| Papamoia Bog            | NZ | -37.70 | 176.30 | 8   | LakeWetland   | 4620YBP(+/-80)     | NA           | 60  | Newnham et al., 1995                    |
| Waihi Beach             | NZ | -37.41 | 175.93 | 8   | LakeWetland   | 2900YBP(+/-100)    | 0YBP         | 60  | Newnham et al., 1995                    |
| Rangitaiki - Site 1     | NZ | -37.90 | 176.90 | NA  | LakeWetland   | 2100YBP            | NA           | NA  | Campbell et al., 1973                   |
| Rangitaiki - Site 2     | NZ | -37.90 | 176.90 | NA  | LakeWetland   | 5200YBP            | NA           | NA  | Campbell et al., 1973                   |
| Rangitaiki - Site 3     | NZ | -37.70 | 176.20 | NA  | LakeWetland   | 2700YBP            | NA           | NA  | Campbell et al., 1973                   |
| NZ speleothem synthesis | NZ | NA     | NA     | NA  | Speleothem    | 30000YBP           | 0YBP         | NA  | Williams et al., 2010                   |
| Paranoa Swamp           | NZ | -34.40 | 172.80 | 6   | LakeWetland   | 17000YBP           | NA           | NA  | Dodson et al., 1988                     |
| Te Werahi Swamp         | NZ | -34.48 | 172.71 | 15  | LakeWetland   | 3700YBP            | NA           | NA  | Dodson et al., 1988                     |
| Harataonga              | NZ | -36.17 | 175.49 | 5   | LakeWetland   | 6500YBP            | 0YBP         | NA  | Nichol et al., 2007                     |
| Moanatuatua Bog         | NZ | -37.93 | 175.37 | 60  | LakeWetland   | 15000YBP           | 0YBP         | 550 | Haenfling et al., 2016                  |
| Ahukawakawa Swamp       | NZ | -39.20 | 174.00 | 920 | LakeWetland   | 3630YBP(+/-80)     | NA           | NA  | McGlone et al., 1988                    |
| Potaema Bog             | NZ | -39.30 | 174.20 | 670 | LakeWetland   | 3510YBP(+/-110)    | NA           | NA  | McGlone et al., 1988                    |
| Repongaere Swamp        | NZ | -38.59 | 177.87 | 18  | LakeWetland   | 5430YBP(+/-60)     | NA           | NA  | Wilmshurst et al., 1999                 |
| Poverty Bay             | NZ | -38.67 | 178.34 | -63 | Marine        | NA                 | NA           | NA  | Wilmshurst et al., 1999                 |
| Glendhu                 | NZ | -45.83 | 169.75 | 602 | LakeWetland   | 12000YBP           | -40YBP       | NA  | McGlone and Wilmshurst, 1999            |
| Eweburn Bog             | NZ | -45.32 | 167.81 | 362 | LakeWetland   | 11000YBP           | NA           | NA  | Wilmshurst et al., 2002                 |
| Wairehu                 | NZ | -39.00 | 175.60 | 610 | LakeWetland   | 15000YBP           | NA           | NA  | McGlone and Topping, 1977               |



|                       |    |         |         |         |               |                  |                |      |                                                         |
|-----------------------|----|---------|---------|---------|---------------|------------------|----------------|------|---------------------------------------------------------|
| Otamangakau Canal     | NZ | -39.00  | 175.60  | 600     | LakeWetland   | 15000YBP         | 10300YBP       | NA   | McGlone and Topping, 1977;<br>McGlone and Topping, 1983 |
| Holden's Bay Site 1   | NZ | -38.12  | 176.30  | 285     | LakeWetland   | NA               | NA             | NA   | McGlone, 1983                                           |
| Holden's Bay Site 2   | NZ | -38.12  | 176.30  | 285     | LakeWetland   | 4000YBP          | 64YBP          | 2350 | McGlone, 1983                                           |
| Merrivale             | NZ | -46.00  | 167.80  | 60      | LakeWetland   | 12000YBP         | NA             | NA   | McGlone and Bathgate, 1983                              |
| Longwood              | NZ | -46.20  | 167.80  | 670     | LakeWetland   | 12000YBP         | NA             | NA   | McGlone and Bathgate, 1983                              |
| Earnscleugh Cave      | NZ | -45.30  | 169.20  | 540     | Geomorphology | 2176YBP(+/-76)   | NA             | NA   | Clark et al., 1996                                      |
| Toitoi                | NZ | -47.10  | 169.98  | 35      | LakeWetland   | 10100YBP         | 0YBP           | NA   | McGlone and Wilson, 1996                                |
| Halfmoon Bay          | NZ | -46.80  | 169.10  | 15      | LakeWetland   | 7300YBP          | -31YBP         | NA   | McGlone and Wilson, 1996                                |
| Rakeahua              | NZ | -46.90  | 167.90  | 681     | LakeWetland   | NA               | NA             | NA   | McGlone and Wilson, 1996                                |
| Rocky Bay             | NZ | -52.57  | 169.15  | 130     | LakeWetland   | 13000YBP         | NA             | NA   | McGlone et al., 1997b; McGlone,<br>2002a                |
| Hooker Cliffs         | NZ | -52.57  | 169.15  | 90      | LakeWetland   | 12950YBP(+/-200) | NA             | NA   | McGlone et al., 1997b; McGlone,<br>2002a                |
| Ruined Hut            | NZ | -45.45  | 169.20  | 1400    | LakeWetland   | 6774YBP(+/-75)   | NA             | 557  | McGlone et al., 1997a                                   |
| Hyde Rock             | NZ | -45.40  | 169.20  | 1540    | LakeWetland   | 7463YBP(+/-97)   | NA             | 400  | McGlone et al., 1997a                                   |
| Campbell Creek        | NZ | -45.40  | 169.20  | 1250    | LakeWetland   | NA               | NA             | 122  | McGlone et al., 1997a                                   |
| Idaburn               | NZ | -45.00  | 169.70  | 420     | LakeWetland   | 7500YBP          | 0YBP           | NA   | McGlone and Moar, 1998                                  |
| Duncan Stream         | NZ | -44.10  | 170.00  | 900     | LakeWetland   | 7996YBP(+/-93)   | 0YBP           | NA   | McGlone and Moar, 1998                                  |
| Ben Dhu               | NZ | -44.40  | 169.80  | 600     | LakeWetland   | 800YBP           | 0YBP           | NA   | McGlone and Moar, 1998                                  |
| Oropuke               | NZ | -44.00  | 176.50  | 290     | LakeWetland   | 14000YBP         | 520YBP(+/-60)  | NA   | McGlone, 2002a                                          |
| Deas Head Forest      | NZ | -50.50  | 166.20  | 20      | LakeWetland   | 11080YBP(+/-120) | NA             | NA   | McGlone, 2002a; McGlone et al.,<br>2000                 |
| Deas Head Bog         | NZ | -50.50  | 166.20  | 20      | LakeWetland   | 11951YBP(+/-95)  | NA             | NA   | McGlone, 2002a; McGlone et al.,<br>2000                 |
| Ranui Cove            | NZ | -50.50  | 166.20  | 5       | LakeWetland   | NA               | NA             | NA   | McGlone, 2002                                           |
| Cropp Hut             | NZ | -43.08  | 170.97  | 895     | LakeWetland   | 7837YBP          | 0YBP           | NA   | McGlone and Basher, 2012                                |
| Tarkus Knob           | NZ | -43.08  | 170.97  | 950     | LakeWetland   | 9337YBP          | 0YBP           | NA   | McGlone and Basher, 2012                                |
| Steadman Creek        | NZ | -43.08  | 170.97  | 820     | LakeWetland   | 10295YBP(+/-95)  | NA             | NA   | McGlone and Basher, 2012                                |
| Round Lake            | NZ | -39.65  | 176.97  | 40      | LakeWetland   | 3507YBP(+/-134)  | 0YBP           | 8    | Chester and Prior, 2004                                 |
| Rotonuiaha            | NZ | -38.90  | 177.00  | 270     | LakeWetland   | 1821YBP          | 41YBP          | 44   | Wilmshurst et al., 1997                                 |
| Quagmire Tarn         | NZ | -43.30  | 171.10  | 740     | LakeWetland   | 11900YBP(+/-200) | NA             | NA   | Burrows and Russell, 1990                               |
| Windy Tarn            | NZ | -43.30  | 171.10  | 750     | LakeWetland   | NA               | NA             | NA   | Burrows and Russell, 1990                               |
| Letham Burn           | NZ | -45.60  | 167.99  | 460     | LakeWetland   | 12599YBP(+/-150) | NA             | NA   | Vandergoes et al., 1997                                 |
| Southern Alp Glaciers | NZ | -43.60  | 170.20  | 750     | Geomorphology | 6520YBP(+/-360)  | 160YBP(+/-30)  | NA   | Schaefer et al., 2009                                   |
| Southern Alp Glaciers | NZ | Various | Various | Various | Geomorphology | 2588YBP(+/-161)  | 13YBP(+/-20)   | NA   | Lorrey et al., 2008                                     |
| Lake Waiiau Swamp     | NZ | -39.78  | 174.67  | 56      | LakeWetland   | 2789YBP(+/-430)  | 0YBP           | 140  | Bussell, 1988                                           |
| Waverley Beach        | NZ | -39.83  | 174.62  | 0       | LakeWetland   | 7000YBP(+/-100)  | 5570YBP(+/-80) | 43   | Bussell, 1988                                           |
| Candle Light          | NZ | -42.50  | 171.10  | 70      | LakeWetland   | NA               | NA             | NA   | Moar and Suggate, 1996                                  |
| Sunday Creek          | NZ | -42.70  | 171.10  | NA      | LakeWetland   | 50000YBP         | NA             | NA   | Moar and Suggate, 1996                                  |
| Ferguson's Pond       | NZ | -42.50  | 171.20  | NA      | LakeWetland   | 130000YBP        | NA             | NA   | Moar and Suggate, 1996                                  |
| Bullock Creek         | NZ | -42.10  | 171.30  | NA      | LakeWetland   | 486000YBP        | NA             | NA   | Moar and Suggate, 1996                                  |
| Martin's Quarry       | NZ | -41.75  | 171.50  | NA      | LakeWetland   | NA               | NA             | NA   | Moar and Suggate, 1996                                  |

|                                |    |         |         |         |             |                  |        |     |                        |
|--------------------------------|----|---------|---------|---------|-------------|------------------|--------|-----|------------------------|
| Hatter's Creek                 | NZ | -42.70  | 171.10  | NA      | LakeWetland | NA               | NA     | NA  | Moar and Suggate, 1996 |
| BA Road                        | NZ | -42.70  | 171.10  | NA      | LakeWetland | NA               | NA     | NA  | Moar and Suggate, 1996 |
| Shantytown                     | NZ | -42.50  | 171.20  | NA      | LakeWetland | 23700YBP(+/-600) | NA     | NA  | Moar and Suggate, 1996 |
| Paroa                          | NZ | -42.50  | 171.20  | NA      | LakeWetland | NA               | NA     | NA  | Moar and Suggate, 1996 |
| Blue Spur Road                 | NZ | -42.70  | 171.00  | NA      | LakeWetland | NA               | NA     | NA  | Moar and Suggate, 1996 |
| Chesterfield Road              | NZ | -42.70  | 171.10  | NA      | LakeWetland | NA               | NA     | NA  | Moar and Suggate, 1996 |
| GDK Corner                     | NZ | -42.70  | 171.10  | NA      | LakeWetland | NA               | NA     | NA  | Moar and Suggate, 1996 |
| Kumara Cemetery                | NZ | -42.70  | 171.10  | NA      | LakeWetland | NA               | NA     | NA  | Moar and Suggate, 1996 |
| Graham's Terrace               | NZ | -42.50  | 171.40  | NA      | LakeWetland | 18500YBP(+/-350) | NA     | NA  | Moar and Suggate, 1996 |
| Wilson's Lead Road             | NZ | 41.70   | 171.40  | NA      | LakeWetland | NA               | NA     | NA  | Moar and Suggate, 1996 |
| Maria's Mire                   | NZ | -42.50  | 171.50  | NA      | LakeWetland | NA               | NA     | NA  | Moar and Suggate, 1996 |
| Nan's Kettle                   | NZ | -42.50  | 171.50  | NA      | LakeWetland | 9230YBP(+/-100)  | NA     | NA  | Moar and Suggate, 1996 |
| Lake Mudgie                    | NZ | -42.70  | 171.10  | NA      | LakeWetland | NA               | NA     | NA  | Moar and Suggate, 1996 |
| Adelaide Tam                   | NZ | -40.56  | 172.32  | 1250    | LakeWetland | 15900YBP(+/-700) | 0YBP   | 140 | Jara et al., 2015      |
| Lake Ohau                      | NZ | -44.23  | 169.85  | 520     | LakeWetland | 24YBP            | -61YBP | 1   | Roop et al., 2016      |
| North Island Speleothem record | NZ | Various | Various | Various | Speleothem  | NA               | NA     | NA  | Lorrey et al., 2008    |
| South Island Speleothem record | NZ | Various | Various | Various | Speleothem  | NA               | NA     | NA  | Lorrey et al., 2008    |
| Waipuna Cave                   | NZ | -38.30  | NA      | 320     | Speleothem  | NA               | -40YBP | NA  | Williams et al., 1999  |
| Max's Cave                     | NZ | -38.30  | NA      | 325     | Speleothem  | 3900YBP(+/-190)  | -40YBP | NA  | Williams et al., 1999  |
| Gardner's Gut Cave             | NZ | -38.30  | NA      | 100     | Speleothem  | 10220YBP(+/-530) | -40YBP | 150 | Williams et al., 1999  |

### References for records listed in Table S1

Ahmad, R.: Late Holocene major Australian arid period revealed by direct sedimentological evidence from lakes in the Coorong region of south Australia, *Geology*, 24, 619-622, 2, 1996.

Aitken, D. L., and Kershaw, A. P.: Holocene vegetation and environmental history of Cranbourne Botanic Garden, Victoria, *Proceedings of the Royal Society of Victoria*, 105, 67-80, 1992.

Allan, T.: Examining diatoms as biological indicators of water quality within 2 coastal lakes, Third year undergraduate report, School of Environmental Science and Management, Southern Cross University, Lismore, 2006.

Allen, V., Head, L., Medlin, G., and Witter, D.: Palaeo-ecology of the Gap and Coturaundee Ranges, western New South Wales, using stick-nest rat (*Leporillus* spp.) (Muridae) middens, *Austral Ecol.*, 25, 333-343, 2000.

Anker, S. A., Colhoun, E. A., Barton, C. E., Peterson, M., and Barbetti, M.: Holocene vegetation and paleoclimatic and paleomagnetic history from Lake Johnston, Tasmania, *Quat. Res.*, 56, 264-274, 2001.

Anshari, G., Kershaw, A. P., and van der Kaars, S.: A Late Pleistocene and Holocene pollen and charcoal record from peat swamp forest, Lake Sentarum Wildlife Reserve, West Kalimantan, Indonesia, *Paleogeogr. Paleoclimatol. Paleoecol.*, 171, 213-228, 2001.

- Ashton, D., and Hargreaves, G.: Dynamics of subalpine vegetation at Echo Flat, Lake Mountain, Victoria, Proceedings of the Ecological Society of Australia[PROC. ECOL. SOC. AUST.]. 1983., 1983.
- Athens, J. S., and Ward, J. V.: Palau Compact Road archaeological investigations, Babeldaob Island, Republic of Palau, U.S. Army Corps of Engineers, Pacific Ocean Division, Hawai'i, Honolulu, 2005.
- Augustinus, P., Reid, M., Andersson, S., Deng, Y., and Horrocks, M.: Biological and geochemical record of anthropogenic impacts in recent sediments from Lake Pupuke, Auckland City, New Zealand, *J. Paleolimn.*, 35, 789-805, 2006.
- Ayliffe, L. K., Gagan, M. K., Zhao, J.-x., Drysdale, R. N., Hellstrom, J. C., Hantoro, W. S., Griffiths, M. L., Scott-Gagan, H., Pierre, E. S., Cowley, J. A., and Suwargadi, B. W.: Rapid interhemispheric climate links via the Australasian monsoon during the last deglaciation, *Nat Commun*, 4, 2013.
- Backhouse, J.: Holocene vegetation and climate record from Barker Swamp, Rottnest Island, Western Australia, *Journal of the Royal Society of Western Australia*, 76, 53-61, 1993.
- Barr, C., Tibby, J., Gell, P., Tyler, J., Zawadzki, A., and Jacobsen, G. E.: Climate variability in south-eastern Australia over the last 1500 years inferred from the high-resolution diatom records of two crater lakes, *Quat. Sci. Rev.*, 95, 115-131, 2014.
- Bell, C. J. E., Finlayson, B. L., and Kershaw, A. P.: Pollen analysis and dynamics of a peat deposit in Carnarvon National Park, central Queensland, *Aust. J. Ecol.*, 14, 449-456, 1989.
- Bickford, S., and Gell, P.: Holocene vegetation change, Aboriginal wetland use and the impact of European settlement on the Fleurieu Peninsula, South Australia, *Holocene*, 15, 200-215, 2005.
- Binder, R., and Kershaw, A. P.: Late Quaternary pollen diagram from southeastern highlands of Australia, *Search*, 9, 44-45, 1978.
- Black, M. P., and Mooney, S. D.: Holocene fire history from the Greater Blue Mountains World Heritage Area, New South Wales, Australia: the climate, humans and fire nexus, *Reg. Envir. Chang.*, 6, 41-51, 2006.
- Black, M. P., Mooney, S. D., and Martin, H. A.: A > 43,000-year vegetation and fire history from Lake Baraba, New South Wales, Australia, *Quat. Sci. Rev.*, 25, 3003-3016, 2006.
- Black, M. P., and Mooney, S. D.: The response of aboriginal burning practices to population levels and El Nino-Southern oscillation events during the mid- to late-Holocene: a case study from the Sydney basin using charcoal and pollen analysis, *Aust. Geogr.*, 38, 37-52, 2007.
- Bostock, H. C., Brooke, B. P., Ryan, D. A., Hancock, G., Pietsch, T., Packett, R., and Harle, K.: Holocene and modern sediment storage in the subtropical macrotidal Fitzroy River estuary, Southeast Queensland, Australia, *Sediment. Geol.*, 201, 321-340, 2007.
- Bottomley, C.: Late Quaternary palaeoenvironments of Carlisle Perched Lake in the Otway Ranges, Victoria, BA (Hons) thesis, Department of Geography and Environmental Science, Monash University, Melbourne, 1994.
- Bourman, R. P., Murray-Wallace, C. V., Belperio, A. P., and Harvey, N.: Rapid coastal geomorphic change in the river Murray Estuary of Australia, *Mar. Geol.*, 170, 141-168, 2000.

- Bowman, G., and Harvey, N.: Geomorphic evolution of a Holocene beach-ridge complex, Lefevre Peninsula, South Australia, *J. Coast. Res.*, 2, 345-362, 1986.
- Boyd, W. E.: Quaternary pollen analysis in the arid zone of Australia - Dalhousie Springs, Central Australia, *Rev. Palaeobot. Palynology*, 64, 331-341, 1990.
- Boyd, W. E.: Proto-Swan Bay: A palaeogeographical model of the Late Holocene Eighteen Mile Swamp, North Stradbroke Island, S.E. Queensland, *Proceedings of the Royal Society of Queensland*, 103, 75-83, 1993.
- Boyd, W. E., Stubbs, B. J., and Averill, C.: The 'grasses' of the Big Scrub District of North-eastern New South Wales: A sedimentary record of late Holocene grasslands in a subtropical forest landscape, *Aust. Geogr.*, 30, 331-336, 1999.
- Brijker, J. M., Jung, S. J. A., Ganssen, G. M., Bickert, T., and Kroon, D.: ENSO related decadal scale climate variability from the Indo-Pacific Warm Pool, *Earth Planet. Sci. Lett.*, 253, 67-82, 2007.
- Bristow, C. S., and Pucillo, K.: Quantifying rates of coastal progradation from sediment volume using GPR and OSL: the Holocene fill of Guichen Bay, south-east South Australia, *Sedimentology*, 53, 769-788, 2006.
- Brook, F. J.: Stratigraphy and landsnail faunas of Late Holocene coastal dunes, Tokerau Beach, northern New Zealand, *J. R. Soc. N.Z.*, 29, 337-359, 1999a.
- Brook, F. J.: Stratigraphy, landsnail faunas, and paleoenvironmental history of coastal dunefields at Te Werahi, northernmost New Zealand, *J. R. Soc. N.Z.*, 29, 361-393, 1999b.
- Brooke, B., Lee, R., Cox, M., Olley, J., and T., P. W.: Rates of shoreline progradation during the last 1700 years at Beachmere, Southeastern Queensland, Australia, based on optically stimulated luminescence dating of beach ridges, *J. Coast. Res.*, 24, 640-648, 2008a.
- Brooke, B., Ryan, D., Pietsch, T., Olley, J., Douglas, G., Packett, R., Radke, L., and Flood, P.: Influence of climate fluctuations and changes in catchment land use on Late Holocene and modern beach-ridge sedimentation on a tropical macrotidal coast: Keppel Bay, Queensland, Australia, *Mar. Geol.*, 251, 195-208, 2008b.
- Buckman, S., Brownlie, K. C., Bourman, R. P., Murray-Wallace, C. V., Morris, R. H., Lachlan, T. J., Roberts, R. G., Arnold, L. J., and Cann, J. H.: Holocene palaeofire records in a high-level, proximal valley-fill (Wilson Bog), Mount Lofty Ranges, South Australia, *Holocene*, 19, 1017-1029, 2009.
- Builth, H., Kershaw, A. P., White, C., Roach, A., Hartney, L., McKenzie, M., Lewis, T., and Jacobsen, G.: Environmental and cultural change on the Mt Eccles lava-flow landscapes of southwest Victoria, Australia, *Holocene*, 18, 413-424, 2008.
- Burrows, C., and Russell, J.: Aranuian vegetation history of the Arrowsmith Range, Canterbury I. Pollen diagrams, plant macrofossils, and buried soils from Prospect Hill, New Zealand *journal of botany*, 28, 323-345, 1990.
- Burrows, M. A., Fenner, J., and Haberle, S. G.: Humification in northeast Australia: Dating millennial and centennial scale climate variability in the late Holocene, *Holocene*, 24, 1707-1718, 10.1177/0959683614551216, 2014.
- Bussell, M. R.: Mid and late Holocene pollen diagrams and Polynesian deforestation, Wanganui District, New Zealand, *New Zealand Journal of Botany*, 26, 431-451, 1988.

- Cameron, N. G., Tyler, P. A., Rose, N. L., Hutchinson, S., and Appleby, P. G.: The recent paleolimnology of Lake Nicholls, Mount Field National Park, Tasmania, *Hydrobiologia*, 269, 361-370, 1993.
- Campbell, E. O., Heine, J. C., and Pullar, W.: Identification of plant fragments and pollen from peat deposits in Rangitaiki Plains and Maketu Basins, *New Zealand journal of botany*, 11, 317-330, 1973.
- Cann, J. H., Murray-Wallace, C. V., Belperio, A. P., and Brenchley, A. J.: Evolution of Holocene coastal environments near Robe, southeastern South Australia, *Quat. Int.*, 56, 81-97, 1999.
- Cann, J. H., Bourman, R. P., and Barnett, E. J.: Holocene foraminifera as indicators of relative estuarine-lagoonal and oceanic influences in estuarine sediments of the River Murray, South Australia, *Quat. Res.*, 54, 439-439, 2000.
- Cann, J. H., Murray-Wallace, C. V., Riggs, N. J., and Belperio, A. P.: Successive foraminiferal faunas and inferred palaeoenvironments associated with the postglacial (Holocene) marine transgression, Gulf St Vincent, South Australia, *Holocene*, 16, 224-234, 2006.
- Carter, J. A.: Phytolith analysis and paleoenvironmental reconstruction from Lake Poukawa Core, Hawkes Bay, New Zealand, *Glob. Planet. Change*, 33, 257-267, 2002.
- Carthew, K. D., and Drysdale, R. N.: Late Holocene fluvial change in a tufa-depositing stream: Davys Creek, New South Wales, Australia, *Aust. Geogr.*, 34, 123-139, 2003.
- Cassidy, H.: The water quality history of Lake Hiawatha, northern NSW, using diatoms as bioindicators., Third Year Undergraduate Report, School of Environmental Science and Management, Southern Cross University, Lismore, 2001.
- Cavanagh, J. E., Burns, K. A., Brunskill, G. J., and Coventry, R. J.: Organochlorine pesticide residues in soils and sediments of the Herbert and Burdekin river regions, North Queensland - Implications for contamination of the Great Barrier Reef, *Mar. Pollut. Bull.*, 39, 367-375, 1999.
- Chalson, J. M.: The late Quaternary vegetation and climatic history of the Blue Mountains, NSW, PhD thesis, UNSW, Kensington, 1991.
- Chalson, J. M., and Martin, H. A.: A 38,000 year history of the Vegetation at Penrith Lakes, New South Wales, *Proceedings of The Linnean Society of New South Wales*, 129, 97-111, 2008.
- Chalson, J. M., and Martin, H. A. A.: A Holocene history of the vegetation of the Blue Mountains, New South Wales, *Proceedings of The Linnean Society of New South Wales*, 130, 77-109, 2009.
- Cheetham, M. D., Bush, R. T., Keene, A. F., Erskine, W. D., and Fitzsimmons, K. E.: Longitudinal correlation of Late Quaternary terrace sequences of Widden Brook, southeastern Australia, *Aust. J. Earth Sci.*, 57, 97-109, 2010.
- Chenhall, B. E., Yassini, I., Depers, A. M., Caitcheon, G., Jones, B. G., Batley, G. E., and Ohmsen, G. S.: Anthropogenic marker evidence for accelerated sedimentation in Lake Illawarra, New South Wales, Australia, *Environmental Geology*, 26, 124-135, 1995.
- Chester, P. I., and Prior, C. A.: An AMS C-14 pollen-dated sediment and pollen sequence from the late holocene, southern coastal Hawke's Bay, New Zealand, *Radiocarbon*, 46, 721-731, 2004.

- Chivas, A., Chappell, J., Polach, H., Pillans, B., and Flood, P.: Radiocarbon evidence for the timing and rate of island development, beach rock formation and phosphatization at Lady Elliot Island, Queensland, Australia, *Mar. Geol.*, 69, 273-287, 1986.
- Chivas, A. R., Garcia, A., van der Kaars, S., Couapel, M. J. J., Holt, S., Reeves, J. M., Wheeler, D. J., Switzer, A. D., Murray-Wallace, C. V., Banerjee, D., Price, D. M., Wang, S. X., Pearson, G., Edgar, N. T., Beaufort, L., De Deckker, P., Lawson, E., and Cecil, C. B.: Sea-level and environmental changes since the last interglacial in the Gulf of Carpentaria, Australia: an overview, *Quat. Int.*, 83-5, 19-46, 2001.
- Churchill, D. M.: Distribution and prehistory of *Eucalyptus Diversicolor* F. Muell., *E. Marginata* Donn Ex Sm., and *E. Calophylla* R.Br. in relation to rainfall, *Aust. J. Bot.*, 16, 125-151, 1968.
- Clark, A.: A preliminary archaeobotanical analysis of the Anbangbang I Site, in: *Archaeological Research in Kakadu National Park*, edited by: Jones, R., Australian National Parks and Wildlife Service, Canberra, 1985.
- Clark, G. R., Petchey, P., McGlone, M. S., and Bristow, P.: Faunal and floral remains from Earnsclough cave, central Otago, New Zealand, *J. R. Soc. N.Z.*, 26, 363-380, 1996.
- Clark, G. R., and Hope, G. S.: Preliminary report on archaeological and palaeoenvironmental investigations in northern Lau (Mago, Yacata-Kaibu, and Vatuvara), Fiji, 1997.
- Clark, R. L.: *The fire history of Rotten Swamp*, A.C.T., CSIRO, Canberra, 1986.
- Clark, R. L., and Guppy, J. C.: A transition from mangrove forest to freshwater wetland in the monsoon tropics of Australia, *J. Biogeogr.*, 15, 665-684, 1988.
- Cohen, T. J., and Nanson, G. C.: Topographically associated but chronologically disjunct late Quaternary floodplains and terraces in a partly confined valley, south-eastern Australia, *Earth Surf. Process. Landf.*, 33, 424-443, 2008.
- Cohen, T. J., Nanson, G. C., Jansen, J. D., Gliganic, L. A., May, J. H., Larsen, J. R., Goodwin, I. D., Browning, S., and Price, D. M.: A pluvial episode identified in arid Australia during the Medieval Climatic Anomaly, *Quat. Sci. Rev.*, 56, 167-171, 2012.
- Colhoun, E. A., and Vandeger, G.: Holocene to middle last glaciation vegetation history at Tullabardine Dam, western Tasmania, *Proceedings of the Royal Society Series B-Biological Sciences*, 229, 177-207, 1986.
- Colhoun, E. A., Barbetti, M., and Geography, U. o. N. N. S. W. D. o.: *Cainozoic vegetation of Tasmania: handbook prepared for 7 International Palynological Congresses, 28 August - 3 September 1988, excursion LB2*, Department of Geography, University of Newcastle, Newcastle, NSW, 1988.
- Colhoun, E. A., Geer, G. V. D., and Hannan, D.: Late Glacial and Holocene Vegetation History at Dublin Bog North-Central Tasmania, *Australian Geographical Studies*, 29, 337-354, 1991.
- Colhoun, E. A.: Late glacial and Holocene vegetation history at Poet's Hill Lake, western Tasmania, *Aust. Geogr.*, 23, 11-23, 1992.
- Colhoun, E. A., Vandeger, G., and Fitzsimons, S. J.: Late Quaternary organic deposits at Smelter Creek and vegetation history of the Middle King Valley, western Tasmania, *J. Biogeogr.*, 19, 217-227, 1992.

- Colhoun, E. A., Pola, J. S., Barton, C. E., and Heijnis, H.: Late Pleistocene vegetation and climate history of Lake Selina, western Tasmania, *Quat. Int.*, 57-8, 5-23, 1999.
- Cook, E. J.: A record of late Quaternary environments at lunette-lakes Bolac and Turangmoroake, Western Victoria, Australia, based on pollen and a range of non-pollen palynomorphs, *Rev. Palaeobot. Palynology*, 153, 185-224, 2009.
- Costin, A. B.: Carbon-14 dates from the Snowy Mountains area, south eastern Australia, and their interpretation, *Quat. Res.*, 2, 579-590, 1972.
- Crausbay, S. D., Russell, J. M., and Schnurrenberger, D. W.: A ca. 800-year lithologic record of drought from sub-annually laminated lake sediment, East Java, *J. Paleolimn.*, 35, 641-659, 2006.
- Crosta, X., Debret, M., Denis, D., Courty, M. A., and Ther, O.: Holocene long- and short-term climate changes off Adelie Land, East Antarctica, *Geochem. Geophys. Geosyst.*, 8, Q11009, 2007.
- Crowley, G. M.: Quaternary soil salinity events and Australian vegetation history, *Quat. Sci. Rev.*, 13, 15-22, 1994.
- Crowley, G. M., and Kershaw, A. P.: Late Quaternary environmental change and human impact around Lake Bolac, Western Victoria, Australia, *J. Quat. Sci.*, 9, 367-377, 1994.
- Crowley, G. M., and Gagan, M. K.: Holocene evolution of coastal wetlands in wet-tropical northeastern Australia, *Holocene*, 5, 385-399, 1995.
- Cupper, M. L., Drinnan, A. N., and Thomas, L.: Holocene palaeoenvironments of salt lakes in the Darling Anabranch region, south-western New South Wales, Australia, *J. Biogeogr.*, 27, 1079-1094, 2000.
- Cupper, M. L.: Last glacial to Holocene evolution of semi-arid rangelands in southeastern Australia, *Holocene*, 15, 541-553, 2005.
- D'Costa, D. M., Edney, P., Kershaw, A. P., and De Deckker, P.: Late Quaternary paleoecology of Tower Hill, Victoria, Australia, *J. Biogeogr.*, 16, 461-482, 1989.
- D'Costa, D. M., and Kershaw, A. P.: A Late Pleistocene and Holocene pollen record from Lake Terang, Western Plains of Victoria, Australia, *Palaeogeography, Palaeoclimatology, Palaeoecology*, 113, 57-67, 1995.
- D'Costa, D. M.: The reconstruction of Quaternary vegetation and climate on King Island, Bass Strait, Australia, PhD thesis, Monash University, Melbourne, 1997.
- De Deckker, P.: Holocene ostracods, other invertebrates and fish remains from cores of four maar lakes in southeastern Australia, *Proceedings of the Royal Society of Victoria*, 94, 183-220, 1982.
- de Montford, M.: Lake Holocene fire history: Human impacts and climate variability at Wingecarribee Swamp, BSc Honours thesis, School of Biological, Earth, and Environmental Sciences, UNSW, Kensington, 2008.
- Denniston, R. F., Wyrwoll, K.-H., Polyak, V. J., Brown, J. R., Asmerom, Y., Wanamaker Jr, A. D., LaPointe, Z., Ellerbroek, R., Barthelmes, M., Cleary, D., Cugley, J., Woods, D., and Humphreys, W. F.: A Stalagmite record of Holocene Indonesian–Australian summer monsoon variability from the Australian tropics, *Quat. Sci. Rev.*, 78, 155-168, 2013.
- Dickinson, W. R., Burley, D. V., Nunn, P. D., Anderson, A., and et al.: Geomorphic and archaeological landscapes of the Sigatoka Dune Site, Viti Levu, Fiji: Interdisciplinary investigations, *Asian Perspectives*, 37, 1-31, 1998.

- Dodson, J. R.: Vegetation history and water fluctuations at Lake Leake, southeastern South Australia. 10,000BP to Present, *Aust. J. Bot.*, 22, 719-741, 1974.
- Dodson, J. R.: The presettlement vegetation of the Mount Gambier area, South Australia, *Transactions of The Royal Society of South Australia*, 99, 1975.
- Dodson, J. R., and Wilson, I. B.: Past and present vegetation of Marshes Swamp in southeastern South Australia, *Aust. J. Bot.*, 23, 123-150, 1975.
- Dodson, J. R.: Late Pleistocene vegetation and environments near Lake Bullenmerri, western Victoria, *Aust. J. Ecol.*, 4, 419-427, 1979.
- Dodson, J. R.: Modern pollen rain and recent vegetation history on Lord Howe Island - evidence of human impact, *Rev. Palaeobot. Palynology*, 38, 1-21, 1982.
- Dodson, J. R.: Holocene vegetation and environments in Goulburn, New South Wales, *Aust. J. Bot.*, 34, 231-249, 1986.
- Dodson, J. R.: Mire development and environmental change, Barrington Tops, New South Wales, Australia, *Quat. Res.*, 27, 73-81, 1987.
- Dodson, J. R., Enright, N. J., and McLean, R. F.: A late Quaternary vegetation history for far northern New Zealand *J. Biogeogr.*, 15, 647-656, 1988.
- Dodson, J. R., and Thom, B. G.: Holocene vegetation history from the Hawkesbury Valley, New South Wales, *Proceedings of The Linnean Society of New South Wales*, 113, 1992.
- Dodson, J. R., McRae, V. M., Molloy, K., Roberts, F., and Smith, J. D.: Late holocene human impact on two coastal environments in New South Wales, Australia: a comparison of Aboriginal and European impacts, *Veget Hist Archaeobot*, 2, 89-100, 1993.
- Dodson, J. R., de Salis, T., Myers, C. A., and Sharp, A. J.: A thousand years of environmental change and human impact in the alpine zone at Mt Kosciusko, New South Wales, *Aust. Geogr.*, 25, 77-87, 1994a.
- Dodson, J. R., Frank, K., Fromme, M., Hickson, D., McRae, V., Mooney, S., and Smith, J. D.: Environmental Systems and Human Impact at Cobrico Crater, South-western Victoria, *Australian Geographical Studies*, 32, 27-40, 1994b.
- Dodson, J. R., Roberts, F. K., and Desalis, T.: Paleoenvironments and human impact at Burruga Swamp in montane rainforest, Barrington Tops National Park, New South Wales, Australia, *Aust. Geogr.*, 25, 161-169, 1994c.
- Dodson, J. R., Mitchell, F. J. G., Bogenholz, H., and Julian, N.: Dynamics of temperate rainforest from fine resolution pollen analysis, Upper Ringarooma River, northeastern Tasmania, *Aust. J. Ecol.*, 23, 550-561, 1998.
- Dodson, J. R., and Lu, J. J.: A late Holocene vegetation and environment record from Byenup Lagoon, south-western Australia, *Aust. Geogr.*, 31, 41-54, 2000.
- Dodson, J. R.: A vegetation and fire history in a subalpine woodland and rain-forest region, Solomons Jewel Lake, Tasmania, *Holocene*, 11, 111-116, 2001.
- Donders, T. H., Wagner, F., and Visscher, H.: Late Pleistocene and Holocene subtropical vegetation dynamics recorded in perched lake deposits on Fraser Island, Queensland, Australia, *Paleogeogr. Paleoclimatol. Paleoecol.*, 241, 417-439, 2006.



- Douglas, G. B., Kuhnen, M., Radke, L. C., Hancock, G., Brooke, B., Palmer, M. J., Pietsch, T., Ford, P. W., Trefry, M. G., and Packett, R.: Delineation of sediment sources to a coastal wetland in the Great Barrier Reef catchment: influence of climate variability and land clearing since European arrival, *Environ. Chem.*, 7, 190-206, 2010.
- Doyle, C. J.: Fluvial geomorphology of the Nambucca Catchment: Late Quaternary change, post settlement channel degradation, and proposal for rehabilitation, PhD thesis, University of Wollongong, Wollongong, 2003.
- Dubois, N., Oppo, D. W., Galy, V. V., Mohtadi, M., van der Kaars, S., Tierney, J. E., Rosenthal, Y., Eglinton, T. I., Luckge, A., and Linsley, B. K.: Indonesian vegetation response to changes in rainfall seasonality over the past 25,000 years, *Nat. Geosci.*, 7, 513-517, 2014.
- Dyson, W. D.: A pollen and vegetation history from Lake Dove, western Tasmania, Honours Thesis, UNSW, Kensington, 1995.
- Eden, D. N., and Page, M. J.: Palaeoclimatic implications of a storm erosion record from late Holocene lake sediments, North Island, New Zealand, *Palaeogeography, Palaeoclimatology, Palaeoecology*, 139, 37-58, 1998.
- Edgar, G., and Samson, C.: Catastrophic decline in mollusc diversity in eastern Tasmania and its concurrence with shellfish fisheries, *Conservation Biology*, 18, 1579-1588, 2004.
- Edney, P. A., Kershaw, A. P., and De Deckker, P.: A late Pleistocene and Holocene vegetation and environmental record from Lake Wangoon, western plains of Victoria, Australia, *Paleogeogr. Paleoclimatol. Paleoecol.*, 80, 325-343, 1990.
- Edwards, S., McKirdy, D. M., Bone, Y., Gell, P. A., and Gostin, V. A.: Diatoms and ostracods as mid-Holocene palaeoenvironmental indicators, North Stromatolite Lake, Coorong National Park, South Australia, *Aust. J. Earth Sci.*, 53, 651-663, 2006.
- Elliot, M. B., Flenley, J. R., and Sutton, D. G.: A late Holocene pollen record of deforestation and environmental change from the Lake Tauanui catchment, Northland, New Zealand, *J. Paleolimn.*, 19, 23-32, 1998.
- Ellison, J.: Holocene palynology and sea-level change in two estuaries in Southern Irian Jaya, *Paleogeogr. Paleoclimatol. Paleoecol.*, 220, 291-309, 2005.
- Eriksson, M. G., Olley, J. M., Kilham, D. R., Pietsch, T., and Wasson, R. J.: Aggradation and incision since the very late Pleistocene in the Naas River, south-eastern Australia, *Geomorphology*, 81, 66-88, 2006.
- Field, J. H., Dodson, J. R., and Prosser, I. P.: A Late Pleistocene vegetation history from the Australian semi-arid zone, *Quat. Sci. Rev.*, 21, 1023-1037, 2002.
- Fitzgerald, F.: The impact of European settlement on two lagoons in New South Wales, Australia, Masters thesis, University of Wollongong, Wollongong, 1998.
- Fitzsimmons, K. E., Rhodes, E. J., Magee, J. W., and Barrows, T. T.: The timing of linear dune activity in the Strzelecki and Tirari Deserts, Australia, *Quat. Sci. Rev.*, 26, 2598-2616, 2007.
- Fitzsimmons, K. E., and Barrows, T. T.: Holocene hydrologic variability in temperate southeastern Australia: An example from Lake George, New South Wales, *Holocene*, 20, 585-597, 2010.
- Fletcher, M. S., Wolfe, B. B., Whitlock, C., Pompeani, D. P., Heijnis, H., Haberle, S. G., Gadd, P. S., and Bowman, D.: The legacy of mid-Holocene fire on a Tasmanian montane landscape, *J. Biogeogr.*, 41, 476-488, 2014.

- Flood, P.: A review of Holocene sea level data, southeastern Queensland, Focus on Stradbroke Island. Brisbane, Queensland, Australia: Boolarong, 132-135, 1984.
- Fluin, J., Gell, P., Haynes, D., Tibby, J., and Hancock, G.: Palaeolimnological evidence for the independent evolution of neighbouring terminal lakes, the Murray Darling Basin, Australia, *Hydrobiologia*, 591, 117-134, 2007.
- Fluin, J., and Gell, P. A.: Sediment derived scenarios of wetland status and change, the lower Murray River, SA, Final report to the South Australian Murray-Darling Basin Natural Resources Management Board, 2008.
- Fryirs, K., and Brierley, G.: The character and age structure of valley fills in upper Wolumla creek catchment, south coast, New South Wales, Australia, *Earth Surf. Process. Landf.*, 23, 271-287, 1998.
- Gell, P., Wallbrink, P., Tassicker, G., and Illman, M.: Secrets in the sediments: a history of sediment and pollution loads in the Lower Torrens River, S.A., in: *Second Australian Stream Management Conference: the Challenge of Rehabilitating Australia's Streams*, edited by: Rutherford, I., and Bartley, R., CRC Catchment Hydrology, Melbourne, 287-292, 1999.
- Gell, P., Tibby, J., Fluin, J., Leahy, P., Reid, M., Adamson, K., Bulpin, S., MacGregor, A., Wallbrink, P., Hancock, G., and Walsh, B.: Accessing limnological change and variability using fossil diatom assemblages, south-east Australia, *River Res. Appl.*, 21, 257-269, 2005.
- Gell, P., and Little, F.: Long term water quality changes in Murrumbidgee floodplain wetlands revealed by fossil diatom assemblages, *Murrumbidgee Wetland Forum*, Leeton, NSW, 22 Nov 2006, 2006.
- Gell, P., Tibby, J., Little, F., Baldwin, D., and Hancock, G.: The impact of regulation and salinisation on floodplain lakes: the lower River Murray, Australia, *Hydrobiologia*, 591, 135-146, 2007.
- Gell, P., Fluin, J., Tibby, J., Hancock, G., Harrison, J., Zawadzki, A., Haynes, D., Khanum, S., Little, F., and Walsh, B.: Anthropogenic acceleration of sediment accretion in lowland floodplain wetlands, Murray-Darling Basin, Australia, *Geomorphology*, 108, 122-126, 2009.
- Gell, P. A., Stuart, I.-M., and Smith, J. D.: The response of vegetation to changing fire regimes and human activity in East Gippsland, Victoria, Australia, *The Holocene*, 3, 150-160, 1993.
- Gell, P. A., Barker, P. A., De Deckker, P., Last, W. M., and Jelicic, L.: The Holocene history of West Basin Lake, Victoria, Australia; chemical changes based on fossil biota and sediment mineralogy, *J. Paleolimn.*, 12, 235-258, 1994.
- Genever, M., Grindrod, J., and Barker, B.: Holocene palynology of Whitehaven Swamp, Whitsunday Island, Queensland, and implications for the regional archaeological record, *Paleogeogr. Paleoclimatol. Paleoecol.*, 201, 141-156, 2003.
- Gerritse, R. G., Wallbrink, P. J., and Murray, A. S.: Accumulation of phosphorus and heavy metals in the Swan-Canning Estuary, Western Australia, *Estuarine Coastal and Shelf Science*, 47, 165-179, 1998.
- Gillieson, D., Smith, D. I., Greenaway, M., and Ellaway, M.: Flood history of the Limestone Ranges in the Kimberley region, Western Australia, *Appl. Geogr.*, 11, 105-123, 1991.
- Gliganic, L. A., Cohen, T. J., May, J.-H., Jansen, J. D., Nanson, G. C., Dosseto, A., Larsen, J. R., and Aubert, M.: Late-Holocene climatic variability indicated by three natural archives in arid southern Australia, *The Holocene*, 24, 104-117, 2014.

- Gomez, B., Carter, L., Orpin, A. R., Cobb, K. M., Page, M. J., Trustrum, N. A., and Palmer, A. S.: ENSO/SAM interactions during the middle and late Holocene, *Holocene*, 22, 23-30, 2012.
- Goodfield, M. L.: A Holocene pollen analytical study of Lake Eacham, Atherton Tableland, north-east Queensland, BSc Honours thesis, Department of Geography, Monash University, Melbourne, 1983.
- Goodwin, I. D., Stables, M. A., and Olley, J. M.: Wave climate, sand budget and shoreline alignment evolution of the Iluka-Woody Bay sand barrier, northern New South Wales, Australia, since 3000 yr BP, *Mar. Geol.*, 226, 127-144, 2006.
- Gouramanis, C., Wilkins, D., and De Deckker, P.: 6000 years of environmental changes recorded in Blue Lake, South Australia, based on ostracod ecology and valve chemistry, *Paleogeogr. Paleoclimatol. Paleoecol.*, 297, 223-237, 2010.
- Gouramanis, C., Dodson, J., Wilkins, D., De Deckker, P., and Chase, B. M.: Holocene palaeoclimate and sea level fluctuation recorded from the coastal Barker Swamp, Rottnest Island, south-western Western Australia, *Quat. Sci. Rev.*, 54, 40-57, 2012.
- Grant, P. J.: Major periods of erosion and alluvial sedimentation in New Zealand during the Late Holocene, *J. R. Soc. N.Z.*, 15, 67-121, 1985.
- Green, J. D., and Lowe, D. J.: Stratigraphy and development of c.17000 year old Lake Maratoto, North Island, New Zealand, with some inferences about postglacial climatic change, *New Zealand Journal of Geology and Geophysics*, 28, 675-699, 1985.
- Griffiths, M. L., Drysdale, R. N., Gagan, M. K., Zhao, J. X., Ayliffe, L. K., Hellstrom, J. C., Hantoro, W. S., Frisia, S., Feng, Y. X., Cartwright, I., Pierre, E. S., Fischer, M. J., and Suwargadi, B. W.: Increasing Australian-Indonesian monsoon rainfall linked to early Holocene sea-level rise, *Nat. Geosci.*, 2, 636-639, 2009.
- Grindrod, J.: Frozen sediments from a tropical lake: a palaeoecological study of Lake Eacham, north-east Queensland, BSc Honours thesis, Department of Geography, Monash University, Melbourne, 1979.
- Haberle, S.: Palaeoenvironmental changes in the eastern highlands of Papua New Guinea, *Archaeology in Oceania*, 31, 1-11, 1996a.
- Haberle, S.: Explanations for palaeoecological changes on the northern plains of Guadalcanal, Solomon Islands: The last 3200 years, *Holocene*, 6, 333-338, 1996b.
- Haberle, S.: Was the early Holocene characterised by 'El Niño-like' or 'La Niña-like' conditions? Evidence from terrestrial archives in the western Pacific Warm Pool region., *Quat. Int.*, 167-168 (Supplement XVII INQUA Congress), 2007.
- Haberle, S. G., Hope, G. S., and Defretes, Y.: Environmental change in the Baliem Valley, montane Irian Jaya, Republic of Indonesia, *J. Biogeogr.*, 18, 25-40, 1991.
- Haberle, S. G.: Late Quaternary vegetation change in the Tari Basin, Papua New Guinea, *Palaeogeography, Palaeoclimatology, Palaeoecology*, 137, 1-24, 1998.
- Haberle, S. G., and Ledru, M. P.: Correlations among charcoal records of fires from the past 16,000 years in Indonesia, Papua New Guinea, and Central and South America, *Quat. Res.*, 55, 97-104, 2001.
- Haberle, S. G.: A 23,000-yr pollen record from Lake Euramoo, Wet Tropics of NE Queensland, Australia, *Quat. Res.*, 64, 343-356, 2005.

- Haberle, S. G., Stevenson, J., Black, M. P., Mooney, S. D., Sniderman, J. M. K., Willis, K. J., and Bennett, K. D.: Fire in the tropics: a paleoclimatic assessment of charcoal records from the Western Pacific Warm Pool region, In Prog. Abstracts of the AGU Chapman, 2005.
- Haenfling, C., Newnham, R., Rees, A., Jara, I., Homes, A., and Clarkson, B.: Holocene history of a raised bog, northern New Zealand, based on plant cuticles, *The Holocene*, 2016.
- Haig, J., Nott, J., and Reichart, G.-J.: Australian tropical cyclone activity lower than at any time over the past 550-1,500 years, *Nature*, 505, 667-671, 2014.
- Harle, K. J., Kershaw, A. P., Macphail, M. K., and Neyland, M. G.: Paleocological analysis of an isolates stand of *Nothofagus Cunninghamii* (Hook) Oerst. in eastern Tasmania, *Aust. J. Ecol.*, 18, 161-170, 1993.
- Harle, K. J.: Late Quaternary vegetation and climate change in southeastern Australia: palynological evidence from marine core E55-6, *Paleogeogr. Paleoclimatol. Paleocol.*, 131, 465-483, 1997.
- Harle, K. J., Hodgson, D. A., and Tyler, P. A.: Palynological evidence for Holocene palaeoenvironments from the lower Gordon River Valley, in the World Heritage Area of southwest Tasmania, *Holocene*, 9, 149-162, 1999.
- Harle, K. J., Britton, K., Heijnis, H., Zawadzki, A., and Jenkinson, A. V.: Mud, mines and rainforest: a short history of human impact in western Tasmania, using pollen, trace metals and lead-210, *Aust. J. Bot.*, 50, 481-497, 2002a.
- Harle, K. J., Heijnis, H., Chisari, R., Kershaw, A. P., Zoppi, U., and Jacobsen, G.: A chronology for the long pollen record from Lake Wangoom, western Victoria (Australia) as derived from uranium/thorium disequilibrium dating, *J. Quat. Sci.*, 17, 707-720, 2002b.
- Harper, M. A., Howorth, R., and McLeod, M.: Late Holocene diatoms in Lake Poukawa - Effects of airfall tephra and changes in depth, *New Zealand Journal of Marine and Freshwater Research*, 20, 107-118, 1986.
- Haworth, R. J., Gale, S. J., Short, S. A., and Heijnis, H.: Land use and lake sedimentation on the New England tablelands of New South Wales, Australia, *Aust. Geogr.*, 30, 51-73, 1999.
- Haynes, D., Gell, P., Tibby, J., Hancock, G., and Goonan, P.: Against the tide: the freshening of naturally saline coastal lakes, southeastern South Australia, *Hydrobiologia*, 591, 165-183, 2007.
- Head, L., and Stuart, I. M. F.: Change in the Aire - Palaeoecology and prehistory in the Aire Basin, Southwestern Victoria, *Monash Publications in Geography*, 24, 1-97, 1980.
- Head, L.: Further discussion of *Phyllocladus* and its pollen in Victoria during the Holocene, *Aust. J. Ecol.*, 10, 73-76, 1985.
- Head, L.: Holocene vegetation, fire and environmental history of the Discovery Bay region, south-western Victoria, *Aust. J. Ecol.*, 13, 21-49, 1988.
- Hembrow, S. C., Taffs, K. H., Atahan, P., Parr, J., Zawadzki, A., and Heijnis, H.: Diatom community response to climate variability over the past 37,000 years in the sub-tropics of the Southern Hemisphere, *Sci. Total Environ.*, 468, 774-784, 2014.
- Heyng, A. M., Mayr, C., Lucke, A., Striewski, B., Wastegard, S., and Wissel, H.: Environmental changes in northern New Zealand since the Middle Holocene inferred from stable isotope records ( $\delta N-15$ ,  $\delta C-13$ ) of Lake Pupuke, *J. Paleolimn.*, 48, 351-366, 2012.

- Heyng, A. M., Mayr, C., Lucke, A., Moschen, R., Wissel, H., Striewski, B., and Bauersachs, T.: Middle and Late Holocene paleotemperatures reconstructed from oxygen isotopes and GDGTs of sediments from Lake Pupuke, New Zealand, *Quat. Int.*, 374, 3-14, 2015.
- Hom, D.: The fire history of Broughton Island, BSc Honours thesis, School of Biological, Earth, and Environmental Sciences, UNSW, Kensington, 2005.
- Hooley, A. D., Southern, W., and Kershaw, A. P.: Holocene vegetation and environments of Sperm Whale Head, Victoria, Australia, *J. Biogeogr.*, 7, 349-362, 1980.
- Hope, G., and Tulip, J.: A long vegetation history from lowland Irian-Jaya, Indonesia, *Paleogeogr. Paleoclimatol. Paleoecol.*, 109, 385-398, 1994.
- Hope, G.: Early fire and forest change in the Baliem Valley, Irian Jaya, Indonesia, *J. Biogeogr.*, 25, 453-461, 1998.
- Hope, G., and Pask, J.: Tropical vegetational change in the late Pleistocene of New Caledonia, *Paleogeogr. Paleoclimatol. Paleoecol.*, 142, 1-21, 1998.
- Hope, G.: Vegetation and fire response to late Holocene human occupation in island and mainland north west Tasmania, *Quat. Int.*, 59, 47-60, 1999.
- Hope, G.: Environmental change in the Late Pleistocene and later Holocene at Wanda site, Soroako, South Sulawesi, Indonesia, *Paleogeogr. Paleoclimatol. Paleoecol.*, 171, 129-145, 2001.
- Hope, G.: Rock Arch and Gallaher's Swamps: core samples collected in the Avon/Robertson Catchments, 17 March 2005, Unpublished Report to Sydney Water, 2005a.
- Hope, G., Macphail, M., and Keaney, B.: Snowy Flat and Ginini Bogs, Brindabella Range, Australian Capital Territory, Unpublished Report to Environment ACT and Ecowise Services, 2005.
- Hope, G., Nanson, R., and Flett, I.: The peat-forming mires of the Australian Capitol Territory, Territory and Municipal Services, Canberra, 2009a.
- Hope, G., Stevenson, J., and Southern, W.: Vegetation histories from the Fijian Islands: alternative records of human impact, *The Early Prehistory of Fiji (Terra Australis 31)* ed by G. Clark and A. Anderson. ANU ePress, Canberra, Australia, 63-86, 2009b.
- Hope, G., Stevenson, J., and Southern, W.: Vegetation histories from the Fijian Islands: Alternative records of human impact, *Early Prehistory of Fiji*, 31, 63-86, 2009c.
- Hope, G. S.: Vegetation history from 6000BP to Present of Wilson's Promontory, Victoria, Australia, *New Phytol.*, 73, 1035-1053, 1974.
- Hope, G. S.: Late Pleistocene and Holocene vegetational history of Hunter Island, northwestern Tasmania, *Aust. J. Bot.*, 26, 493-514, 1978.
- Hope, G. S., Hughes, P. J., and Russell-Smith, J.: Geomorphological fieldwork and the evolution of the landscape of Kakadu National Park, in: *Archaeological Research in Kakadu National Park*, edited by: Jones, R., Australian National Parks and Wildlife Service, Canberra, 1985.

- Hope, G. S.: Quaternary change and historical biogeography of Pacific Island, in: *The Origin and Evolution of Pacific Island Biotas, New Guinea to Eastern Polynesia: Patterns and Process*, edited by: Keast, A., and Miller, S. E., SPB Publishers, Amsterdam, 165-190, 1996a.
- Hope, G. S.: A reconnaissance survey of potential sites for pollen analysis on Aneityum Island, southern Vanuatu, Unpublished report to Vanuatu Cultural Centre, Vanuatu, 1996b.
- Hope, G. S., O'Dea, D., and Southern, W.: Holocene vegetation histories in the Western Pacific - alternative records of human impact, in: *Colonisation of the Pacific 3000-2000 BP*, edited by: Lilley, I., and Galipaud, J. C., ORSTOM, Port Villa, 1999.
- Hope, G. S.: Tom Gregory Bog, and infilled meander of the upper Cotter River, Australian Capital Territory, Unpublished Report to Ecowise ACT and Environment ACT, 2005b.
- Hope, G. S., and Aplin, K.: Environmental Change in the Aru Islands, in: *The Archaeology of the Aru Islands Eastern Indonesia*, edited by: O'Connor, S., Spriggs, M., and Veth, P., Pandanus Press, Canberra, 25-40, 2005.
- Hope, G. S., Coddington, J., and O'Dea, D.: Estuarine development and human occupation at Bobundara Swamp, Tilba Tilba, New South Wales, Australia, in: *Wetland Archaeology and Environments: Regional Issues, Global Perspectives*, edited by: Lillie, M., and Ellis, S., Oxbow, Oxford, 258 - 274, 2006a.
- Hope, G. S., Stevenson, J., and Haberle, S.: Palaeoecology of Blundells Fltat, ACT, Unpublished Report to Ecowise Services and ACT Forests, 2006b.
- Hope, G. S.: Palaeoecology and Palaeoenvironments of Papua, in: *The Ecology of Papua, Part 1*, edited by: Marshall, A. J., and Beehler, B. M., Periplus Editions (HK) Ltd., Singapore, 2007a.
- Hope, G. S.: The history of human impact on New Guinea, in: *The Ecology of Papua, Part 2*, edited by: Marshall, A. J., and Beehler, B. M., Periplus Editions (HK) Ltd., Singapore, 1087-1097, 2007b.
- Hopf, F. V. L., Colhoun, E. A., and Barton, C. E.: Late-glacial and Holocene record of vegetation and climate from Cynthia Bay, Lake St Clair, Tasmania, *J. Quat. Sci.*, 15, 725-732, 2000.
- Horrocks, M., and Ogden, J.: The effects of the Taupo Tephra eruption of c. 1718 BP on the vegetation of Mt Hauhungatahi, central North Island, New Zealand, *J. Biogeogr.*, 25, 649-660, 10.1046/j.1365-2699.1998.2540649.x, 1998.
- Horrocks, M., Ogden, J., Nichol, S., Alloway, B., and Sutton, D.: The palynology and sedimentology of a coastal swamp at Awana, Great Barrier Island, New Zealand, from c. 7000 yr BP to present, *J. R. Soc. N.Z.*, 29, 213-233, 1999.
- Horrocks, M., Deng, Y., Ogden, J., and Sutton, D. G.: A reconstruction of the history of a Holocene sand dune on Great Barrier Island, northern New Zealand, using pollen and phytolith analyses, *J. Biogeogr.*, 27, 1269-1277, 2000a.
- Horrocks, M., Ogden, J., Nichol, S., Alloway, B., and Sutton, D.: Palynology, sedimentology and environmental significance of Holocene swamps at northern Kaitoke, Great Barrier Island, New Zealand, *J. R. Soc. N.Z.*, 30, 27-47, 2000b.
- Horrocks, M., Ogden, J., Nichol, S., Alloway, B., and Sutton, D.: A Late Quaternary palynological and sedimentological record from two coastal swamps at southern Kaitoke, Great Barrier Island, New Zealand, *J. R. Soc. N.Z.*, 30, 49-68, 2000c.

- Horrocks, M., Deng, Y., Ogden, J., Alloway, B. V., Nichol, S. L., and Sutton, D. G.: High spatial resolution of pollen and charcoal in relation to the c600-year-BP Kaharoa Tephra: Implications for Polynesian settlement of Great Barrier Island, Northern New Zealand, *J. Archaeol. Sci.*, 28, 153-168, 2001.
- Horrocks, M., Deng, Y., Nichol, S. L., Shane, P. A., and Ogden, J.: A palaeoenvironmental record of natural and human change from the Auckland Isthmus, New Zealand, during the late Holocene, *J. R. Soc. N.Z.*, 32, 337-353, 2002a.
- Horrocks, M., Nichol, S. L., and Shane, P. A.: A 6000-year palaeoenvironmental record from Harataonga, Great Barrier Island, New Zealand, *New Zealand Journal of Botany*, 40, 123-135, 2002b.
- Horrocks, M., Augustinus, P., Deng, Y. B., Shane, P., and Andersson, S.: Holocene vegetation, environment, and tephra recorded from Lake Pupuke, Auckland, New Zealand, *New Zealand Journal of Geology and Geophysics*, 48, 85-94, 2005.
- Horrocks, M., Nichol, S. L., D'Costa, D. M., Augustinus, P., Jacobi, T., Shane, P. A., and Middleton, A.: A late quaternary record of natural change and human impact from Rangihoua Bay, Bay of Islands, northern New Zealand, *J. Coast. Res.*, 23, 592-604, 2007.
- Hughes, A. O., Olley, J. M., Croke, J. C., and McKergow, L. A.: Sediment source changes over the last 250 years in a dry-tropical catchment, central Queensland, Australia, *Geomorphology*, 104, 262-275, 2009.
- Iles, M. T.: Catchment impacts of mining in the Adelaide River region, Northern Territory, Australia, Honours thesis, Charles Darwin University, 1998.
- Illman, M.: A reconstruction of the Lake Holocene Palaeosalinity and palaeoecology of Lashmar's Lagoon, Kangaroo Island, South Australia, Honours Thesis, Department of Geography, University of Adelaide, Adelaide, 1997.
- Itzstein-Davey, F.: An early Holocene palaeoenvironmental record from Two Mile Lake, South-Western Australia, *Aust. Geogr.*, 35, 317-332, 2004.
- Jahnert, R., de Paula, O., Collins, L., Strobach, E., and Pevzner, R.: Evolution of a coquina barrier in Shark Bay, Australia by GPR imaging: Architecture of a Holocene reservoir analog, *Sediment. Geol.*, 281, 59-74, 2012.
- Jara, I. A., Newnham, R. M., Vandergoes, M. J., Foster, C. R., Lowe, D. J., Wilmshurst, J. M., Moreno, P. I., Renwick, J. A., and Homes, A. M.: Pollen-climate reconstruction from northern South Island, New Zealand ( 41 degrees S), reveals varying high- and low-latitude teleconnections over the last 16 000 years, *J. Quat. Sci.*, 30, 817-829, 2015.
- Jenkins, M. A.: A Holocene vegetation record from an interdunal swamp, Mornington Peninsula, Victoria, Master of Environmental Science Thesis, Department of Geography and Environmental Science, Monash University, Melbourne, 1992.
- Johnson, A. G.: Fine resolution palaeoecology confirms anthropogenic impact during the Late Holocene in the lower Hawkesbury Valley, NSW, *Aust. Geogr.*, 31, 209-235, 2000.
- Johnston, P., and Brierley, G.: Late Quaternary river evolution of floodplain pockets along Mulloon Creek, New South Wales, Australia, *The Holocene*, 16, 661-674, 2006.
- Jones, B. G., Killian, H. E., Chenhall, B. E., and Sloss, C. R.: Anthropogenic effects in a coastal lagoon: Geochemical characterization of Burrill Lake, NSW, Australia, *J. Coast. Res.*, 19, 621-632, 2003.

- Jones, R. L.: Late Holocene vegetational changes on the Illawarra coastal plain, New South Wales, Australia, *Rev. Palaeobot. Palynology*, 65, 37-46, 1990.
- Kemp, J., Radke, L. C., Olley, J., Juggins, S., and De Deckker, P.: Holocene lake salinity changes in the Wimmera, southeastern Australia, provide evidence for millennial-scale climate variability, *Quat. Res.*, 77, 65-76, 2012.
- Kemp, J., and Hope, G.: Vegetation and environments since the Last Glacial Maximum in the Southern Tablelands, New South Wales, *J. Quat. Sci.*, 29, 778-788, 2014.
- Kenyon, C. E.: A late Pleistocene and Holocene palaeoecological record from Boulder Flat, East Gippsland, BSc Honours thesis, Department of Botany and Zoology, Monash University, Melbourne, 1989.
- Kershaw, A. P.: Pollen diagram from Quincan Crater, northeast Queensland, Australia, *New Phytol.*, 70, 669-681, 1971.
- Kershaw, A. P.: Stratigraphy and pollen analysis of Bromfield Swamp, northeastern Queensland, Australia, *New Phytol.*, 75, 173-191, 1975.
- Kershaw, A. P., Dunkerly, D. L., Quinn, M., and Southern, W.: A scientific and environmental investigation of Jackson's Bog, Southern Tablelands of N.S.W., Unpublished Report to National Parks and Wildlife Service of N.S.W., 1979.
- Kershaw, A. P.: A Holocene pollen diagram from Lynch's Crater, northeastern Queensland, Australia, *New Phytol.*, 94, 669-682, 1983.
- Kershaw, A. P., and Green, J. E.: Tawonga Bog revisited: the history of a low altitude peat deposit, *Victorian Naturalist*, 100, 256-259, 1983.
- Kershaw, A. P., Bretherton, S. C., and van der Kaars, S.: A complete pollen record of the last 230 ka from Lynch's Crater, north-eastern Australia, *Paleogeogr. Paleoclimatol. Paleoecol.*, 251, 23-45, 2007a.
- Kershaw, A. P., McKenzie, G. M., Porch, N., Roberts, R. G., Brown, J., Heijnis, H., Orr, M. L., Jacobsen, G., and Newallt, P. R.: A high-resolution record of vegetation and climate through the last glacial cycle from Caledonia Fen, southeastern highlands of Australia, *J. Quat. Sci.*, 22, 481-500, 2007b.
- Kodala, P. G., and Dodson, J. R.: A late Holocene vegetation and fire record from Kuring-gai Chase National Park, NSW, *Proceedings of The Linnean Society*, 110, 317-326, 1988.
- Kodala, P. G.: The vegetation of the Robertson Plateau, New South Wales: historical and contemporary issues, PhD thesis, UNSW, Kensington, 1996.
- Konecky, B. L., Russell, J. M., Rodysill, J. R., Vuille, M., Bijaksana, S., and Huang, Y. S.: Intensification of southwestern Indonesian rainfall over the past millennium, *Geophys. Res. Lett.*, 40, 386-391, 2013.
- Konfirst, M. A., Sjunneskog, C., Scherer, R. P., and Doran, P. T.: A diatom record of environmental change in Fryxell Basin, Taylor Valley, Antarctica, late Pleistocene to present, *J. Paleolimn.*, 46, 257-272, 2011.
- Ladd, P. G.: Vegetation history at Lake Curlip in lowland eastern Victoria, from 5200 B.P to present, *Aust. J. Bot.*, 26, 393-414, 1978.
- Ladd, P. G.: Short pollen diagram from rainforest in highland eastern Victoria, *Aust. J. Ecol.*, 4, 229-237, 1979a.



- Ladd, P. G.: Past and present vegetation on the Delegate River in the highlands of eastern Victoria. 2. Vegetation and climatic history from 12,000BP to Present, *Aust. J. Bot.*, 27, 185-202, 10.1071/bt9790185, 1979b.
- Ladd, P. G.: Holocene vegetation record from the eastern side of Wilson's Promontory, Victoria, *New Phytol.*, 82, 265-276, 1979c.
- Ladd, P. G., Orchiston, D. W., and Joyce, E. B.: Holocene vegetation history of Flinder's Island, *New Phytol.*, 122, 757-767, 1992.
- Lane, C.: The use of diatoms as biological indicators of water quality in two coastal dune lakes, northern NSW, Honours thesis, Southern Cross University, Lismore, 1999.
- Langton, S. J., Linsley, B. K., Robinson, R. S., Rosenthal, Y., Oppo, D. W., Eglinton, T. I., Howe, S. S., Djajadihardja, Y. S., and Syamsudin, F.: 3500 yr record of centennial-scale climate variability from the Western Pacific Warm Pool, *Geology*, 36, 795-798, 2008.
- Last, W. M., and De Deckker, P.: Modern and Holocene carbonate sedimentology of two saline volcanic maar lakes, southern Australia, *Sedimentology*, 37, 967-981, 1990.
- Latham, M., Hughes, P. J., Hope, G., and Brookfield, M.: Sedimentation in the swamps of Lakeba and its implications for erosion and human occupation of the island, in: *The Eastern Islands of Fiji - a study of the natural environment, its use, and man's influence on its evolution*, edited by: Latham, M., and Brookfield, H. C., *Travaux et Documents de l'ORSTOM*, Paris, 103-120, 1983.
- Leahy, P. J., Tibby, J., Kershaw, A. P., Heijnis, H., and Kershaw, J. S.: The impact of European settlement on Bolin Billabong, a Yarra River floodplain lake, Melbourne, Australia, *River Res. Appl.*, 21, 131-149, 2005.
- Lees, B. G.: The development of a chenier sequence on the Victoria Delta, Joseph Bonaparte Gulf, northern Australia, *Mar. Geol.*, 103, 215-224, 1992.
- Lees, B. G., Lu, Y. C., and Price, D. M.: Thermoluminescence dating of dunes at Cape St. Lambert, East Kimberleys, Northwestern Australia, *Mar. Geol.*, 106, 131-139, 1992.
- Lees, B. G., Stanner, J., Price, D. M., and Yanchou, L.: Thermoluminescence dating of dune podzols at Cape Arnhem, northern Australia, *Mar. Geol.*, 129, 63-75, 1995.
- Leyden, E., Tibby, J., Garcia, A., and Zawadzki, A.: Unexpected post-settlement freshening and increase in charophytes in Bombah Broadwater (Myall Lakes, New South Wales, Australia), *J. Paleolimn.*, 46, 637-647, 2011.
- Linsley, B. K., Rosenthal, Y., and Oppo, D. W.: Holocene evolution of the Indonesian throughflow and the western Pacific warm pool, *Nat. Geosci.*, 3, 578-583, 2010.
- Lloyd, P. J., and Kershaw, A. P.: Late quaternary vegetation and early Holocene quantitative climate estimates from Morwell Swamp, Latrobe Valley, south-eastern Australia, *Aust. J. Bot.*, 45, 549-563, 1997.
- Logan, B.: Palaeoenvironmental reconstruction of a wetland in west Byron Bay and the establishment of pre-European conditions, Honours thesis, Southern Cross University, Lismore, 2003.

- Logan, B., Taffs, K. H., Eyre, B. D., and Zawadski, A.: Assessing changes in nutrient status in the Richmond River estuary, Australia, using paleolimnological methods, *J. Paleolimn.*, 46, 597-611, 2011.
- Logan, B., and Taffs, K. H.: Relationship between diatoms and water quality (TN, TP) in sub-tropical east Australian estuaries, *J. Paleolimn.*, 50, 123-137, 2013.
- Longmore, M. E., O'Leary, B. M., and Rose, C. W.: Caesium-137 profiles in the sediments of a partial-meromictic lake on Great Sandy Island (Fraser Island), Queensland, Australia, *Hydrobiologia*, 103, 21-27, 1983.
- Longmore, M. E.: Quaternary palynological records from perched lake sediments, Fraser Island, Queensland, Australia: Rainforest, forest history and climatic control, *Aust. J. Bot.*, 45, 507-526, 1997.
- Lorrey, A., Williams, P., Salinger, J., Martin, T., Palmer, J., Fowler, A., Zhao, J. X., and Neil, H.: Speleothem stable isotope records interpreted within a multi-proxy framework and implications for New Zealand palaeoclimate reconstruction, *Quat. Int.*, 187, 52-75, 2008.
- Luly, J. G., Bowler, J. M., and Head, M. J.: A radiocarbon chronology from the playa Lake Tyrrell, northwestern Victoria, Australia, *Paleogeogr. Paleoclimatol. Paleocol.*, 54, 171-180, 1986.
- Luly, J. G.: Holocene Palaeoenvironments Near Lake Tyrrell, Semi-Arid Northwestern Victoria, Australia, *J. Biogeogr.*, 20, 587-598, 1993.
- Luly, J. G.: On the equivocal fate of Late Pleistocene *Callitris* Vent. (Cupressaceae) woodlands in arid South Australia, *Quat. Int.*, 83-5, 155-168, 2001.
- MacGregor, A. J., Gell, P. A., Wallbrink, P. J., and Hancock, G.: Natural and post-European settlement variability in water quality of the lower Snowy River floodplain, eastern Victoria, Australia, *River Res. Appl.*, 21, 201-213, 2005.
- Macken, A. C., Staff, R. A., and Reed, E. H.: Bayesian age-depth modelling of Late Quaternary deposits from Wet and Blanche Caves, Naracoorte, South Australia: A framework for comparative faunal analyses, *Quat. Geochronol.*, 17, 26-43, 2013.
- Macphail, M.: Pollen analysis of a buried organic deposit on the backshore of Fingal Bay, Port Stevens, New South Wales, *Proceedings of The Linnean Society of New South Wales*, 98, 222-233, 1973.
- Macphail, M.: Late Pleistocene environments in Tasmania, *Search*, 6, 295-300, 1975.
- Macphail, M., and Neale, J.: Kingston Swamp, Norfolk Swamp, Norfolk Island: a unique natural archive of SW Pacific prehistory, Interim Report prepared for the Australian Heritage Commission, 1996.
- Macphail, M. K.: Vegetation and climates in southern Tasmania since the last glaciation, *Quat. Res.*, 11, 306-341, 1979.
- Macphail, M. K., and Hope, G. S.: Palynological report, Core site KCA, Kingston Swamp, Norfolk Island, Unpublished Report to Australian Heritage Commission, 1997.
- Macphail, M. K., Pemberton, M., and Jacobson, G.: Peat mounds of southwest Tasmania: possible origins, *Aust. J. Earth Sci.*, 46, 667-677, 1999.
- MacPhail, M. K., Hope, G. S., and Anderson, A.: Polynesian plant introductions in the southwest Pacific: Initial pollen evidence from Norfolk Island, *Records of the Australian Museum, Supplement 27*, 123-134, 2001.

- Macreadie, P. I., Rolph, T. C., Schröder-Adams, C., Boyd, R., and Skilbeck, C. G.: Holocene record of Tuggerah Lake estuary development on the Australian east coast: Sedimentary responses to sea-level fluctuations and climate variability, *GeoResJ*, 5, 57-73, 2015.
- Martin, A. R. H.: Kurnell Fen - An eastern Australian coastal wetland, its Holocene vegetation, relevant to sea level change and aboriginal land use, *Rev. Palaeobot. Palynology*, 80, 311-332, 1994.
- Martin, A. R. H.: Pollen analysis of Digger's Creek Bog, Kosciuszko National Park: Vegetation history and tree-line change, *Aust. J. Bot.*, 47, 725-744, 1999.
- Martin, H. A.: Palynology and historical ecology of some cave excavations in Australian Nullarbor, *Aust. J. Bot.*, 21, 283-316, 1973.
- Martin, L., Mooney, S., and Goff, J.: Coastal wetlands reveal a non-synchronous island response to sea-level change and a palaeostorm record from 5.5 kyr to present, *Holocene*, 24, 569-580, 2014.
- Marx, S. K., McGowan, H. A., and Kamber, B. S.: Long-range dust transport from eastern Australia: A proxy for Holocene aridity and ENSO-type climate variability, *Earth Planet. Sci. Lett.*, 282, 167-177, 10.1016/j.epsl.2009.03.013, 2009.
- Marx, S. K., Kamber, B. S., McGowan, H. A., and Denholm, J.: Holocene dust deposition rates in Australia's Murray-Darling Basin record the interplay between aridity and the position of the mid-latitude westerlies, *Quat. Sci. Rev.*, 30, 3290-3305, 2011.
- Mason, S.: Late Holocene fire activity at Mellong Swamp, Wollemi National Park, NSW, BSc Honours thesis, School of Biological, Earth, and Environmental Sciences, UNSW, Kensington, 2004.
- Maupin, C. R., Partin, J. W., Shen, C. C., Quinn, T. M., Lin, K., Taylor, F. W., Banner, J. L., Thirumalai, K., and Sinclair, D. J.: Persistent decadal-scale rainfall variability in the tropical South Pacific Convergence Zone through the past six centuries, *Clim. Past.*, 10, 1319-1332, 2014.
- McCarthy, L., Head, L., and Quade, J.: Holocene palaeoecology of the northern Flinders ranges, south Australia, based on stick-nest rat (*Leporillus* spp) middens: A preliminary overview, *Paleogeogr. Paleoclimatol. Paleoecol.*, 123, 205-218, 1996.
- McCarthy, L., and Head, L.: Holocene variability in semi-arid vegetation: new evidence from *Leporillus* middens from the Flinders Ranges, South Australia, *Holocene*, 11, 681-689, 2001.
- McGlone, M. S., and Topping, W. W.: Aranuiian (postglacial) pollen diagrams from Tongariro Region, North Island, New Zealand, *New Zealand Journal of Botany*, 15, 749-&, 1977.
- McGlone, M. S.: Holocene pollen diagrams, Lake Rotorua, North Island, New Zealand, *J. R. Soc. N.Z.*, 13, 53-65, 1983.
- McGlone, M. S., and Bathgate, J. L.: Vegetation and climate history of the Longwood Range, South Island, New Zealand, 12000 BP to the Present, *New Zealand Journal of Botany*, 21, 293-315, 1983.
- McGlone, M. S., and Topping, W. W.: Late Quaternary vegetation Tongariro Region, central North Island, New Zealand, *New Zealand Journal of Botany*, 21, 53-76, 1983.
- McGlone, M. S., Neall, V. E., and Clarkson, B. D.: The effect of recent volcanic events and climatic changes on the vegetation of Mt Egmont (Mt Taranaki), New Zealand, *New Zealand Journal of Botany*, 26, 123-144, 1988.

- McGlone, M. S., and Wilson, H. D.: Holocene vegetation and climate of Stewart Island, New Zealand, *New Zealand Journal of Botany*, 34, 369-388, 1996.
- McGlone, M. S., Moar, N. T., and Meurk, C. D.: Growth and vegetation history of alpine mires on the Old Man Range, Central Otago, New Zealand, *Arct. Alp. Res.*, 29, 32-44, 1997a.
- McGlone, M. S., Moar, N. T., Wardle, P., and Meurk, C. D.: Late-glacial and Holocene vegetation and environment of Campbell Island, far southern New Zealand, *Holocene*, 7, 1-12, 1997b.
- McGlone, M. S., and Moar, N. T.: Dryland Holocene vegetation history, Central Otago and the Mackenzie Basin, South Island, New Zealand, *New Zealand Journal of Botany*, 36, 91-111, 1998.
- McGlone, M. S., and Wilmshurst, J. M.: A Holocene record of climate, vegetation change and peat bog development, east Otago, South Island, New Zealand, *J. Quat. Sci.*, 14, 239-254, 1999.
- McGlone, M. S., Wilmshurst, J. M., and Wisser, S. K.: Lateglacial and Holocene vegetation and climatic change on Auckland Island, Subantarctic New Zealand, *Holocene*, 10, 719-728, 2000.
- McGlone, M. S.: The origin of the indigenous grasslands of southeastern South Island in relation to pre-human woody ecosystems, *N. Z. J. Ecol.*, 25, 1-15, 2001.
- McGlone, M. S.: A Holocene and latest Pleistocene pollen record from Lake Poukawa, Hawke's Bay, New Zealand, *Glob. Planet. Change*, 33, 283-299, 2002a.
- McGlone, M. S.: The late quaternary peat, vegetation and climate history of the southern oceanic islands of New Zealand, *Quat. Sci. Rev.*, 21, 683-707, 2002b.
- McGlone, M. S., Turney, C. S. M., and Wilmshurst, J. M.: Late-glacial and Holocene vegetation and climatic history of the Cass basin, central south island, New Zealand, *Quat. Res.*, 62, 267-279, 2004.
- McGlone, M. S.: Postglacial history of New Zealand wetlands and implications for their conservation, *N. Z. J. Ecol.*, 33, 1-23, 2009.
- McGlone, M. S., and Basher, L.: Holocene vegetation change at treeline, Cropp Valley, Southern Alps, New Zealand, in: *Peopled Landscapes: Archaeological and Biogeographic Approaches to Landscapes*, edited by: Haberle, S. G., and David, B., Terra Australis, Australian Natl Univ, Canberra Act, 343-358, 2012.
- McGowan, H. A., Petherick, L. M., and Kamber, B. S.: Aeolian sedimentation and climate variability during the late Quaternary in southeast Queensland, Australia, *Palaeogeography, Palaeoclimatology, Palaeoecology*, 265, 171-181, 2008.
- McGrath, R., and Boyd, W. E.: Holocene vegetation history of Bundjalung National Park and Bungawalbin creek, northeastern New South Wales, *Aust. Geogr.*, 29, 205-221, 1998.
- McKenzie, G. M.: The late Quaternary vegetation history of the south-central highlands of Victoria, Australia .1. Sites above 900 m, *Aust. J. Ecol.*, 22, 19-36, 1997.
- McKenzie, G. M., and Kershaw, A. P.: A vegetation history and quantitative estimate of Holocene climate from Chapple Vale, in the Otway region of Victoria, Australia, *Aust. J. Bot.*, 45, 565-581, 1997.

- McKenzie, G. M., and Kershaw, A. P.: The last glacial cycle from Wyelangta, the Otway region of Victoria, Australia, *Paleogeogr. Paleoclimatol. Paleoecol.*, 155, 177-193, 2000.
- McKenzie, G. M.: The late Quaternary vegetation history of the south-central highlands of Victoria, Australia. II. Sites below 900 m, *Austral Ecol.*, 27, 32-54, 2002.
- McKenzie, G. M., and Kershaw, A. P.: A Holocene pollen record from cool temperate rainforest, Aire crossing, the Otway region of Victoria, Australia, *Rev. Palaeobot. Palynology*, 132, 281-290, <http://dx.doi.org/10.1016/j.revpalbo.2004.07.006>, 2004.
- McMinn, A., Augustinus, P., and Barton, C.: Diatom analysis of late Holocene sediment cores from Macquarie Harbour, Tasmania, *Alcheringa*, 27, 135-153, 2003.
- McMinn, A., Heijnis, H., Murray, A., and Hallegraeff, G.: Diatom and dinoflagellate assemblages of the Hawkesbury River, NSW, over the last two centuries: evidence for changes in hydrology, *Alcheringa*, 28, 505-514, 2004.
- Mee, A. C., McKirdy, D. M., Williams, M. A. J., and Krull, E. S.: New radiocarbon dates from spropels in three Holocene lakes of the Coorong coastal plain, southeastern Australia, *Aust. J. Earth Sci.*, 54, 825-835, 2007.
- Metcalf, G. D.: Without a paddle: a study of the effects of landuse and urban development in the Erskine Creek catchment, Honours thesis, University of Wollongong, Wollongong, 1999.
- Mettam, P., Tibby, J., Barr, C., and Marshall, J.: Development of Eighteen Mile Swamp, North Stradbroke Island: a palaeolimnological study, *Proceedings of the Royal Society of Queensland*, 117, 119-131, 2011.
- Mills, K., Gell, P., and Kershaw, P.: The recent Victorian drought and its impact: without precedent?, Australian Government: Rural Industries, Research, and Development Corporation Project No. PRJ-005440, 2011.
- Moar, N. T., and Suggate, R. P.: Vegetation history from the Kaihinu (last) interglacial to the present, west coast, South Island, New Zealand, *Quat. Sci. Rev.*, 15, 521-547, 1996.
- Mohtadi, M., Prange, M., Oppo, D. W., De Pol-Holz, R., Merkel, U., Zhang, X., Steinke, S., and Lückge, A.: North Atlantic forcing of tropical Indian Ocean climate, *Nature*, 509, 76-80, 2014.
- Mooney, S.: A fine-resolution paleoclimatic reconstruction of the last 2000 years, from Lake Keilambete, southeastern Australia, *Holocene*, 7, 139-149, 1997.
- Mooney, S. D., Watson, J. R., and Dodson, J. R.: Late Holocene environmental change in an upper montane area of the Snowy Mountains, New South Wales, *Aust. Geogr.*, 28, 185-200, 1997.
- Mooney, S. D., Radford, K. L., and Hancock, G.: Clues to the 'burning question': Pre-European fire in the Sydney coastal region from sedimentary charcoal and palynology, *Ecological Management & Restoration*, 2, 203-212, 2001.
- Mooney, S. D., and Maltby, E. L.: Two proxy records revealing the late Holocene fire history at a site on the central coast of New South Wales, Australia, *Austral Ecol.*, 31, 682-695, 2006.
- Mooney, S. D., Webb, M., and Attenbrow, V.: A comparison of charcoal and archaeological information to address the influences on Holocene fire activity in the Sydney Basin, *Aust. Geogr.*, 38, 177-194, 2007.
- Moros, M., De Deckker, P., Jansen, E., Perner, K., and Telford, R. J.: Holocene climate variability in the Southern Ocean recorded in a deep-sea sediment core off South Australia, *Quat. Sci. Rev.*, 28, 1932-1940, 2009.

- Morris, A.: The biogeography of plant communities at Woodman Point, WA, Postgraduate Diploma of Science thesis, University of Western Australia, Perth, 1996.
- Moss, P. T., Thomas, I., and Macphail, M.: Late Holocene vegetation and environments of the Mersey Valley, Tasmania, *Aust. J. Bot.*, 55, 74-82, 2007.
- Moss, P. T., Tibby, J., Petherick, L., McGowan, H., and Barr, C.: Late Quaternary vegetation history of North Stradbroke Island, Queensland, eastern Australia, *Quat. Sci. Rev.*, 74, 257-272, 2013.
- Nanson, G. C.: Episodes of vertical accretion and catastrophic stripping - A model of disequilibrium floodplain development, *Geol. Soc. Am. Bull.*, 97, 1467-1475, 1986.
- Nanson, G. C., Callen, R. A., and Price, D. M.: Hydroclimatic interpretation of Quaternary shorelines on south Australian playas, *Paleogeogr. Paleoclimatol. Paleoecol.*, 144, 281-305, 1998.
- Napoli, M.: The contaminant chronologies of Prospect Creek and Salt Pan Creek as recorded in their sediments, Honours thesis, University of Sydney, Sydney, 1996.
- Newnham, R. M., Lowe, D. J., and Wigley, G. N. A.: Late Holocene palynology and palaeovegetation of tephra-bearing mires at Papamoa and Waihi Beach, Western Bay of Plenty, North Island, New Zealand, *J. R. Soc. N.Z.*, 25, 283-300, 1995.
- Newnham, R. M., Lowe, D. J., and Matthews, B. W.: A late-Holocene and prehistoric record of environmental change from Lake Waikaremoana, New Zealand, *Holocene*, 8, 443-454, 1998.
- Newnham, R. M., Lowe, D. J., Giles, T., and Alloway, B. V.: Vegetation and climate of Auckland, New Zealand, since ca. 32 000 cal. yr ago: support for an extended LGM, *J. Quat. Sci.*, 22, 517-534, 2007.
- Newsome, J. C., and Pickett, E. J.: Palynology and paleoclimatic implications of 2 Holocene sequences from southwestern Australia, *Paleogeogr. Paleoclimatol. Paleoecol.*, 101, 245-261, 1993.
- Newton, A., Thunell, R., and Stott, L.: Climate and hydrographic variability in the Indo-Pacific Warm Pool during the last millennium, *Geophys. Res. Lett.*, 33, L19710, 2006.
- Newton, A., Thunell, R., and Stott, L.: Changes in the Indonesian Throughflow during the past 2000 yr, *Geology*, 39, 63-66, 2011.
- Nichol, S. L., Lian, O. B., Horrocks, M., and Goff, J. R.: Holocene record of gradual, catastrophic, and human-influenced sedimentation from a backbarrier wetland, northern New Zealand, *J. Coast. Res.*, 23, 605-617, 2007.
- Nott, J., Bryant, E., and Price, D.: Early-Holocene aridity in tropical northern Australia, *Holocene*, 9, 231-236, 1999.
- Nott, J., Haig, J., Neil, H., and Gillieson, D.: Greater frequency variability of landfalling tropical cyclones at centennial compared to seasonal and decadal scales, *Earth Planet. Sci. Lett.*, 255, 367-372, 2007.
- Nott, J., Smithers, S., Walsh, K., and Rhodes, E.: Sand beach ridges record 6000 year history of extreme tropical cyclone activity in northeastern Australia, *Quat. Sci. Rev.*, 28, 1511-1520, 2009.
- Oakes, G. M.: The Jacksons Bog peat deposits, N.S.W. Geological Survey, 1981.
- Ogden, R. W.: Modern and historical variation in aquatic macrophyte cover of billabongs associated with catchment development, *Regul. Rivers-Res. Manage.*, 16, 497-512, 2000.

- Oppo, D. W., Rosenthal, Y., and Linsley, B. K.: 2,000-year-long temperature and hydrology reconstructions from the Indo-Pacific warm pool, *Nature*, 460, 1113-1116, 2009.
- Organo, R. J.: The spatial and temporal distribution of pollution in the Cox's river, NSW, Honours thesis, University of Wollongong, Wollongong, 2000.
- Packwood, A.: An environmental investigation of Lake Conjola, South Coast, NSW, Honours thesis, University of Wollongong, Wollongong, 1999.
- Page, M. J., Trustrum, N. A., Orpin, A. R., Carter, L., Gomez, B., Cochran, U. A., Mildenhall, D. C., Rogers, K. M., Brackley, H. L., Palmer, A. S., and Northcote, L.: Storm frequency and magnitude in response to Holocene climate variability, Lake Tutira, North-Eastern New Zealand, *Mar. Geol.*, 270, 30-44, 2010.
- Partin, J. W., Cobb, K. M., Adkins, J. F., Clark, B., and Fernandez, D. P.: Millennial-scale trends in west Pacific warm pool hydrology since the Last Glacial Maximum, *Nature*, 449, 452-455, 2007.
- Partin, J. W., Quinn, T. M., Shen, C.-C., Emile-Geay, J., Taylor, F. W., Maupin, C. R., Lin, K., Jackson, C. S., Banner, J. L., Sinclair, D. J., and Huh, C.-A.: Multidecadal rainfall variability in South Pacific Convergence Zone as revealed by stalagmite geochemistry, *Geology*, 41, 1143-1146, 2013.
- Patton, P. C., Pickup, G., and Price, D. M.: Holocene paleofloods of the Ross River, central Australia, *Quat. Res.*, 40, 201-212, 1993.
- Penny, D.: Palaeoecology and human impact at Lake Coleman, East Gippsland, Victoria, Honours thesis, Monash University, Melbourne, 1993.
- Peters, G. M., Maher, W. A., Jolley, D., Carroll, B. I., Gomes, V. G., Jenkinson, A. V., and McOrist, G. D.: Selenium contamination, redistribution and remobilisation in sediments of Lake Macquarie, NSW, *Org. Geochem.*, 30, 1287-1300, 1999.
- Petherick, L. M., McGowan, H. A., and Kamber, B. S.: Reconstructing transport pathways for late Quaternary dust from eastern Australia using the composition of trace elements of long traveled dusts, *Geomorphology*, 105, 67-79, 2009.
- Pittock, J.: Palaeoenvironments of the Mt. Disappointment Plateau (Kinglake West, Victoria), from the late Pleistocene, BSc Honours thesis, Department of Geography and Environmental Science, Monash University, Melbourne, 1989.
- Prebble, M., Sim, R., Finn, J., and Fink, D.: A Holocene pollen and diatom record from Vanderlin Island, Gulf of Carpentaria, lowland tropical Australia, *Quat. Res.*, 64, 357-371, 2005.
- Prosser, I. P., Chappell, J., and Gillespie, R.: Holocene valley aggradation and gully erosion in headwater catchments, southeastern highlands of Australia, *Earth Surf. Process. Landf.*, 19, 465-480, 10.1002/esp.3290190507, 1994.
- Pye, K., and Rhodes, E. G.: Holocene development of an episodic transgressive dune barrier, Ramsay Bay, north Queensland, Australia, *Mar. Geol.*, 64, 189-202, 1985.
- Radclyffe, E.: Fire and People in Jervis Bay: toward a fire history in an occupied landscape, BA Honours thesis, Department of Geography, Australian National University, Canberra, 1993.
- Raine, J. I.: Pollen sedimentation in relation to Quaternary vegetation history of the Snowy Mountains of New South Wales, Dissertation, Australian National University, Canberra, 1974.

- Rasbury, M., and Aharon, P.: ENSO-controlled rainfall variability records archived in tropical stalagmites from the mid-ocean island of Niue, South Pacific, *Geochem. Geophys. Geosyst.*, 7, 15, 2006.
- Reid, M., Fluin, J., Ogden, R., Tibby, J., and Kershaw, A.: Long-term perspectives on human impacts on floodplain-river ecosystems, Murray-Darling Basin, Australia, 2002.
- Reid, M. A., Sayer, C. D., Kershaw, A. P., and Heijnis, H.: Palaeolimnological evidence for submerged plant loss in a floodplain lake associated with accelerated catchment soil erosion (Murray River, Australia), *J. Paleolimn.*, 38, 191-208, 2007.
- Rhodes, E. G., Polach, H. A., Thom, B. G., and Wilson, S. R.: Age structure of Holocene coastal sediments - Gulf of Carpentaria, Australia, *Radiocarbon*, 22, 718-727, 1980.
- Robbie, A.: The history of the vegetation from the palynology of Mountain Lagoon, Blue Mountains, New South Wales, BSc thesis, UNSW, Kensington, 1998.
- Robertson, M.: Fire regimes and vegetation dynamics: a case study examining the potential of fine resolution palaeoecological techniques, BA Honours thesis, Department of Geography, Monash University, Melbourne, 1986.
- Rodysill, J. R., Russell, J. M., Crausbay, S. D., Bijaksana, S., Vuille, M., Edwards, R. L., and Cheng, H.: A severe drought during the last millennium in East Java, Indonesia, *Quat. Sci. Rev.*, 80, 102-111, 2013.
- Rogers, J., and Hope, G. S.: The Holocene infill of Nursery Swamp, a large sedgelend in the Australian Capital Territory, Unpublished Report to Environment ACT, 2006.
- Rogers, K., Saintilan, N., and Heijnis, H.: Mangrove encroachment of salt marsh in Western Port Bay, Victoria: The role of sedimentation, subsidence, and sea level rise, *Estuaries*, 28, 551-559, 2005.
- Roop, H. A., Levy, R., Dunbar, G. B., Vandergoes, M. J., Howarth, J., Fitzsimons, S., Moon, H., Zammit, C., Ditchburn, R., Baisden, T., and Yoon, H. I.: A hydroclimate-proxy model based on sedimentary facies in an annually laminated sequence from Lake Ohau, South Island, New Zealand, *J. Paleolimn.*, 55, 1-16, 2016.
- Rose, S., and Martin, H. A.: The vegetation history of the Holocene at Dry Lake, Thirlmere, New South Wales, *Proceedings of The Linnean Society of New South Wales*, 128, 15-55, 2007.
- Rowe, C.: A Holocene history of vegetation change in the western Torres Strait region, Queensland, Australia, PhD Thesis, School of Geography and Environmental Science, Monash University, Melbourne, 2006.
- Rowe, C.: A palynological investigation of Holocene vegetation change in Torres Strait, seasonal tropics of northern Australia, *Paleogeogr. Paleoclimatol. Paleoecol.*, 251, 83-103, 2007.
- Rowe, C., McNiven, I. J., David, B., Richards, T., and Leavesley, M.: Holocene pollen records from Caution Bay, southern mainland Papua New Guinea, *Holocene*, 23, 1130-1142, 2013.
- Rowe, R. K.: Rare bog community at Tawonga, Victoria, *Victorian Naturalist*, 85, 123-124, 1968.
- Russell-Smith, J.: A record of change: studies of Holocene vegetation history in the South Alligator River region, Northern Territory, *Proceedings of the Ecological Society of Australia*, 13, 191-202, 1985.
- Salas, M. R.: A reconnaissance survey of the vegetation and sedimentary record of Lake Tali Karing, Honours thesis, Monash University, Melbourne, 1981.



- Sandercock, P., and Wyrwoll, K. H.: The historical and palaeoflood record of Katherine river, northern Australia: evaluating the likelihood of extreme discharge events in the context of the 1998 flood, *Hydrol. Process.*, 19, 4107-4120, 2005.
- Saunders, K. M., McMinn, A., Roberts, D., Hodgson, D. A., and Heijnis, H.: Recent human-induced salinity changes in Ramsar-listed Orielton Lagoon, south-east Tasmania, Australia: a new approach for coastal lagoon conservation and management, *Aquat. Conserv.-Mar. Freshw. Ecosyst.*, 17, 51-70, 2007.
- Saunders, K. M., Hodgson, D. A., Harrison, J., and McMinn, A.: Palaeoecological tools for improving the management of coastal ecosystems: a case study from Lake King (Gippsland Lakes) Australia, *J. Paleolimn.*, 40, 33-47, 2008.
- Saunders, K. M., Kamenik, C., Hodgson, D. A., Hunziker, S., Siffert, L., Fischer, D., Fujak, M., Gibson, J. A. E., and Grosjean, M.: Late Holocene changes in precipitation in northwest Tasmania and their potential links to shifts in the Southern Hemisphere westerly winds, *Glob. Planet. Change*, 92-93, 82-91, 2012.
- Saunders, K. M., Grosjean, M., and Hodgson, D. A.: A 950 yr temperature reconstruction from Duckhole Lake, southern Tasmania, Australia, *Holocene*, 23, 771-783, 2013a.
- Saunders, K. M., Harrison, J. J., Butler, E. C. V., Hodgson, D. A., and McMinn, A.: Recent environmental change and trace metal pollution in World Heritage Bathurst Harbour, southwest Tasmania, Australia, *J. Paleolimn.*, 50, 471-485, 2013b.
- Scarlett, N. H., Hope, G. S., and Calder, D. M.: Natural history of the Hogan Group Part 3: floristics and plant communities, *Papers and Proceedings of the Royal Society of Tasmania*, 107, 83-98, 1974.
- Schaefer, J. M., Denton, G. H., Kaplan, M. R., Putnam, A., Finkel, R. C., Barrell, D. J. A., Andersen, B. G., Schwartz, R., Mackintosh, A., Chinn, T., and Schluchter, C.: High-Frequency Holocene Glacier Fluctuations in New Zealand Differ from the Northern Signature, *Science*, 324, 622-625, 2009.
- Shulmeister, J.: A Holocene Pollen record from Lowland Tropical Australia, *The Holocene*, 2, 107-116, 1992.
- Shulmeister, J., and Lees, B. G.: Morphology and chronostratigraphy of a coastal dunefield - Groote Eylandt, northern Australia, *Geomorphology*, 5, 521-534, 1992.
- Sigleo, W. R., and Colhoun, E. A.: A short pollen diagram from Crown Lagoon in the midlands of Tasmania, *Papers and Proceedings of the Royal Society of Tasmania*, 115, 181-188, 1981.
- Sim, A. K.: The investigation of vegetation thickening in central Queensland using palaeoecological techniques, Honours thesis, UNSW, Kensington, 2004.
- Singh, G., and Geissler, E. A.: Late Cainozoic History of Vegetation, Fire, Lake Levels and Climate, at Lake George, New South Wales, Australia, *Philosophical Transactions of the Royal Society of London. Series B, Biological Sciences*, 311, 379-447, 1985.
- Singh, G., and Luly, J.: Changes in vegetation and seasonal climate since the last full glacial at Lake Frome, South Australia, *Paleogeogr. Paleoclimatol. Paleoecol.*, 84, 75-&, 1991.
- Skilbeck, C. G., Rolph, T. C., Hill, N., Woods, J., and Wilkens, R. H.: Holocene millennial/centennial-scale multiproxy cyclicity in temperate eastern Australian estuary sediments, *J. Quat. Sci.*, 20, 327-347, 2005.
- Sloss, C. R., Jones, B. G., Murray-Wallace, C. V., and McClennen, C. E.: Holocene sea level fluctuations and the sedimentary evolution of a barrier estuary: Lake Illawarra, New South Wales, Australia, *J. Coast. Res.*, 21, 943-959, 2005.

- Smeulders, D. M.: A late Holocene environmental reconstruction using lake sediments from Hopwood's Lagoon, NSW, BSc Honours thesis, School of Geography, UNSW, Kensington, 1999.
- Smith, J. D., and Hamilton, T. F.: Modeling of Pb210 behavior in the catchment and sediment of Lake Tali Karing, Victoria, and estimation of recent sedimentation rates, *Australian Journal of Marine and Freshwater Research*, 36, 15-22, 1985.
- Southern, W.: Late Quaternary vegetation and environments of Jackson's Bog and the Monaro Tablelands, New South Wales, MSc thesis, Monash University, Melbourne, 1982.
- Stahle, L. N., Whitlock, C., and Haberle, S. G.: A 17,000-year-long record of vegetation and fire from Cradle Mountain National Park, Tasmania, *Frontiers in Ecology and Evolution*, 4, 2016.
- Stanley, S., and De Deckker, P.: A Holocene record of allochthonous, aeolian mineral grains in an Australian alpine lake; implications for the history of climate change in southeastern Australia, *J. Paleolimn.*, 27, 207-219, 2002.
- Steinke, S., Prange, M., Feist, C., Groeneveld, J., and Mohtadi, M.: Upwelling variability off southern Indonesia over the past two millennia, *Geophys. Res. Lett.*, 41, 2014.
- Stevenson, J.: Late Quaternary environmental change and the impact of Melanesian colonisation in New Caledonia, PhD thesis, UNSW, Kensington, 1998.
- Stevenson, J.: A late-Holocene record of human impact from the southwest coast of New Caledonia, *Holocene*, 14, 888-898, 2004.
- Stevenson, J., and Hope, G.: A comparison of late Quaternary forest changes in New Caledonia and northeastern Australia, *Quat. Res.*, 64, 372-383, 2005.
- Stone, T.: The late-Holocene origin of the modern Murray River course, southeastern Australia, *Holocene*, 16, 771-778, 2006.
- Stott, L., Cannariato, K., Thunell, R., Haug, G. H., Koutavas, A., and Lund, S.: Decline of surface temperature and salinity in the western tropical Pacific Ocean in the Holocene epoch, *Nature*, 431, 56-59, 2004.
- Stott, L. D.: Comment on "Anomalous radiocarbon ages for foraminifera shells" by W. Broecker et al.: A correction to the western tropical Pacific MD9821-81 record, *Paleoceanography*, 22, 2007.
- Strickland, K. M.: Studies on the relationship between the pollen rain and vegetation in the vicinity of Cascade Creek on the Baw Baw Plateau, Victoria, BSc Honours thesis, Department of Botany and Zoology, Monash University, Melbourne, 1980.
- Sweller, S., and Martin, H. A.: A 40,000 year vegetation history and climatic interpretations of Burruga Swamp, Barrington Tops, New South Wales, *Quat. Int.*, 83-5, 233-244, 2001.
- Taffs, K. H.: Diatoms as indicators of wetland salinity in the Upper South East of South Australia, *Holocene*, 11, 281-290, 2001.
- Taffs, K. H., Farago, L. J., Heijnis, H., and Jacobsen, G.: A diatom-based Holocene record of human impact from a coastal environment: Tuckean Swamp, eastern Australia, *J. Paleolimn.*, 39, 71-82, 2008.
- Thevenon, F., Bard, E., Williamson, D., and Beaufort, L.: A biomass burning record from the West Equatorial Pacific over the last 360 ky: methodological, climatic and anthropic implications, *Paleogeogr. Paleoclimatol. Paleoecol.*, 213, 83-99, 2004.
- Thom, B. G., Polach, H. A., and Bowman, G. M.: Holocene age structure of coastal sand barriers in New South Wales, Royal Military College, Duntroon, ACT, 1978.

- Thomas, A.: Giandarra Bog, NSW - A natural record of environmental change, BSc Honours thesis, Australian Defense Force Academy, Canberra, 1991.
- Thomas, I., and Hope, G.: An example of Holocene vegetation stability from Cameron's Lagoon, a near treeline site on the Central Plateau, Tasmania, *Aust. J. Ecol.*, 19, 150-158, 1994.
- Thomas, I., and Kirkpatrick, J. B.: The roles of coastlines, people and fire in the development of heathlands in northeast Tasmania, *J. Biogeogr.*, 23, 717-728, 1996.
- Thomas, I., Enright, N. J., and Kenyon, C. E.: The Holocene history of mediterranean-type plant communities, Little Desert National Park, Victoria, Australia, *Holocene*, 11, 691-697, 2001.
- Thomas, M. F., Nott, J., Murray, A. S., and Price, D. M.: Fluvial response to late quaternary climate change in NE Queensland, Australia, *Paleogeogr. Paleoclimatol. Paleoecol.*, 251, 119-136, 10.1016/j.palaeo.2007.02.021, 2007.
- Tibby, J.: A mid- to late-Holocene diatom and pollen palaeoecology of the Tuross Lake system, South Coast, New South Wales, *Monash Publications in Geography*, 46, 1-62, 1996.
- Tibby, J.: A mid-Holocene to present palaeoecological study of the Tuross Lakes system, south coast, New South Wales, *First Australian Diatom Workshop*, Warnambool, Australia, 1998, 92-103.
- Tibby, J.: Diatoms as indicators of sedimentary processes in Burrinjuck reservoir, New South Wales, Australia, *Quat. Int.*, 83-5, 245-256, 2001.
- Tibby, J., Reid, M. A., Fluin, J., Hart, B. T., and Kershaw, A. P.: Assessing long-term pH change in an Australian river catchment using monitoring and palaeolimnological data, *Environ. Sci. Technol.*, 37, 2003.
- Tibby, J., and Haberle, S. G.: A late glacial to present diatom record from Lake Euramoo, wet tropics of Queensland, Australia, *Paleogeogr. Paleoclimatol. Paleoecol.*, 251, 46-56, 2007.
- Tibby, J., Lane, M. B., and Gell, P. A.: Local knowledge and environmental management: a cautionary tale from Lake Ainsworth, New South Wales, Australia, *Environ. Conserv.*, 34, 334-341, 2007.
- Tibby, J., Gell, P., Hancock, G., and Clark, M.: Complex reservoir sedimentation revealed by an unusual combination of sediment records, Kangaroo Creek Reservoir, South Australia, *J. Paleolimn.*, 43, 535-549, 2010.
- Tibby, J. C., Penny, D., Leahy, P. J., and Kershaw, P. A.: Vegetation and water quality responses to Holocene climate variability in Lake Purrumbete, western Victoria, in: *Peopled landscapes: archaeological and biogeographic approaches to landscapes*, edited by: Haberle, S. G. D., B., *Terra Australis*, 359-373, 2012.
- Tierney, J. E., Oppo, D. W., Rosenthal, Y., Russell, J. M., and Linsley, B. K.: Coordinated hydrological regimes in the Indo-Pacific region during the past two millennia, *Paleoceanography*, 25, 2010.
- Torgersen, T., and Longmore, M.: <sup>137</sup>Cs diffusion in the highly organic sediment of Hidden Lake, Fraser Island, Queensland, *Mar. Freshw. Res.*, 35, 537-548, 1984.
- Treble, P. C., Chappell, J., Gagan, M. K., McKeegan, K. D., and Harrison, T. M.: In situ measurement of seasonal delta O-18 variations and analysis of isotopic trends in a modern speleothem from southwest Australia, *Earth Planet. Sci. Lett.*, 233, 17-32, 2005.

- Umitsu, M., Buman, M., Kawase, K., and Woodroffe, C. D.: Holocene palaeoecology and formation of the Shoalhaven River deltaic-estuarine plains, southeast Australia, *The Holocene*, 11, 407-418, 2001.
- van de Geer, G., Fitzsimons, S. J., and Colhoun, E. A.: Holocene to Middle Last Glaciation vegetation history at Newall Creek, wester Tasmania, *New Phytol.*, 111, 549-558, 1989.
- van der Geer, G., Fitzsimons, S. J., and Colhoun, E. A.: Holocene vegetation history from King River railway bridge, Western Tasmania, *Papers and Proceedings of the Royal Society of Tasmania*, 125, 73-77, 1991.
- Van der Kaars, S.: Late Quaternary vegetation and climate of Australasia as reflected by the palynology of eastern Indonesian deep sea piston-cores, PhD thesis, Department of Palynology and Palaeoecology, University of Amsterdam, Amsterdam, 1989.
- van der Kaars, S., Wang, X., Kershaw, P., Guichard, F., and Setiabudi, D. A.: A Late Quaternary palaeoecological record from the Banda Sea, Indonesia: patterns of vegetation, climate and biomass burning in Indonesia and northern Australia, *Paleogeogr. Paleoclimatol. Paleoecol.*, 155, 135-153, 2000.
- van der Kaars, S., Penny, D., Tibby, J., Fluin, J., Dam, R. A. C., and Suparan, P.: Late Quaternary palaeoecology, palynology and palaeolimnology of a tropical lowland swamp: Rawa Danau, West-Java, Indonesia, *Palaeogeography, Palaeoclimatology, Palaeoecology*, 171, 185-212, 2001.
- van der Kaars, S., and De Deckker, P.: A Late Quaternary pollen record from deep-sea core Fr10/95, GC17 offshore Cape Range Peninsula, northwestern Western Australia, *Rev. Palaeobot. Palynology*, 120, 17-39, 2002.
- Vandergoes, M. J., Fitzsimons, S. J., and Newnham, R. M.: Late glacial to Holocene vegetation and climate change in the eastern Takitimu Mountains, western Southland, New Zealand, *J. R. Soc. N.Z.*, 27, 53-66, 1997.
- Wagner, B., Melles, M., Doran, P. T., Kenig, F., Forman, S. L., Pierau, R., and Allen, P.: Glacial and postglacial sedimentation in the Fryxell Basin, Taylor Valley, southern Victoria Land, Antarctica, *Paleogeogr. Paleoclimatol. Paleoecol.*, 241, 320-337, 2006.
- Walker, D.: The frequency of lamination in the sediments of Lake Barrine, tropical north-east Australia, during the last five millennia, *Paleogeogr. Paleoclimatol. Paleoecol.*, 299, 214-226, 2011.
- Wang, X., van der Kaars, S., Kershaw, P., Bird, M., and Jansen, F.: A record of fire, vegetation and climate through the last three glacial cycles from Lombok Ridge core G6-4, eastern Indian Ocean, Indonesia, *Paleogeogr. Paleoclimatol. Paleoecol.*, 147, 241-256, 1999.
- Wasson, R., Bayliss, P., and Clelland, S.: River flow and climate in the 'top end' of Australia for the last 1000 years, and the Asian-Australian monsoon, *Kakadu National Park Landscape Symposia Series*, 2007, 15-31.
- Wasson, R. J., Clark, R. L., Nanninga, P. M., and Waters, J.: Pb-210 as a chronometer and tracer, Burrinjuck Reservoir, Australia, *Earth Surf. Process. Landf.*, 12, 399-414, 1987.
- Wilkins, D., Gouramanis, C., De Deckker, P., Fifield, L. K., and Olley, J.: Holocene lake-level fluctuations in Lakes Keilambete and Gnotuk, southwestern Victoria, Australia, *Holocene*, 23, 784-795, 2013.
- Williams, J. M.: Crystal Bog, Mount Buffalo: a palaeoecological study of a subalpine peat deposit, Department of Geography, Monash University, Melbourne, 1980.

- Williams, N. J., Harle, K. J., Gale, S. J., and Heijnis, H.: The vegetation history of the last glacial-interglacial cycle in eastern New South Wales, Australia, *J. Quat. Sci.*, 21, 735-750, 2006.
- Williams, P., Marshall, A., Ford, D., and Jenkinson, A.: Palaeoclimatic interpretation of stable isotope data from Holocene speleothems of the Waitomo district, North Island, New Zealand, *The Holocene*, 9, 649-657, 1999.
- Williams, P. W., Neil, H. L., and Zhao, J. X.: Age frequency distribution and revised stable isotope curves for New Zealand speleothems: palaeoclimatic implications, *International Journal of Speleology*, 39, 99-112, 2010.
- Wills, N.: A palaeolimnological analysis of Lake Cudgen, northern NSW: directions for future management, Third year undergraduate report, School of Environmental Science and Management, Southern Cross University, Lismore, 2001.
- Wilmshurst, J. M., McGlone, M. S., and Partridge, T. R.: A late Holocene history of natural disturbance in lowland podocarp/hardwood forest, Hawke's Bay, New Zealand, *New Zealand Journal of Botany*, 35, 79-96, 1997.
- Wilmshurst, J. M., Eden, D. N., and Froggatt, P. C.: Late Holocene forest disturbance in Gisborne, New Zealand: a comparison of terrestrial and marine pollen records, *New Zealand Journal of Botany*, 37, 523-540, 1999.
- Wilmshurst, J. M., McGlone, M. S., and Charman, D. J.: Holocene vegetation and climate change in southern New Zealand: Linkages between forest composition and quantitative surface moisture reconstructions from an ombrogenous bog, *J. Quat. Sci.*, 17, 653-666, 2002.
- Witt, G. B., Luly, J., and Fairfax, R. J.: How the west was once: vegetation change in south-west Queensland from 1930 to 1995, *J. Biogeogr.*, 33, 1585-1596, 2006.
- Wohl, E. E., Fuertsch, S. J., and Baker, V. R.: Sedimentary records of late Holocene floods along the Fitzroy and Margaret Rivers, Western Australia, *Aust. J. Earth Sci.*, 41, 273-280, 1994.
- Woltering, M., Atahan, P., Grice, K., Heijnis, H., Taffs, K., and Dodson, J.: Glacial and Holocene terrestrial temperature variability in subtropical east Australia as inferred from branched GDGT distributions in a sediment core from Lake McKenzie, *Quat. Res.*, 82, 132-145, 2014.
- Worthy, M., Macphail, M., Wasson, R., Hope, G., and Olley, J.: Environmental change in the alluvial infill of Muellers Rock Creek, upper Cotter Valley, ACT, Unpublished Report to Ecowise ACT and Environment ACT, 2005.
- Yonge, D., and Hesse, P. P.: Geomorphic environments, drainage breakdown, and channel and floodplain evolution on the lower Macquarie River, central-western New South Wales, *Aust. J. Earth Sci.*, 56, 35-53, 2009.
- Zhang, X., Heijnis, H., Dodson, J., Zawadzki, A., and Buchanan, G.: Environmental changes indicated by grain-size and trace-metal analysis over the past 700 years at Annaburroo Billabong, NT, Australia, *Quaternary Australasia*, 28, 3, 2011.

Figure S1. Comparison of the two possible age models published by the original authors for the Upper Snowy Mountain core (left) (Marx et al., 2011), and the BACON-derived age model for the same core (right).

Figure S2. Comparison of the published CLAM-derived, classical statistics based age model for Lake Elingamite (left) (Barr et al., 2014) and the BACON-derived, Bayesian statistics based age model created for this study (right).

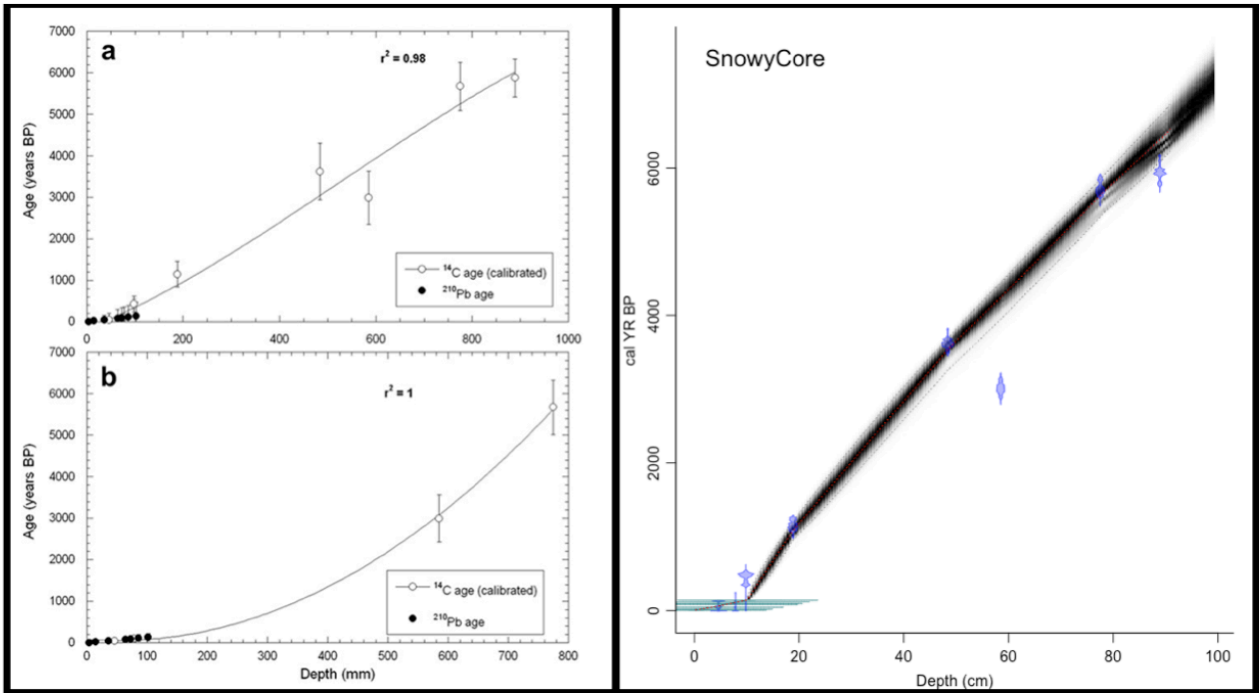

5

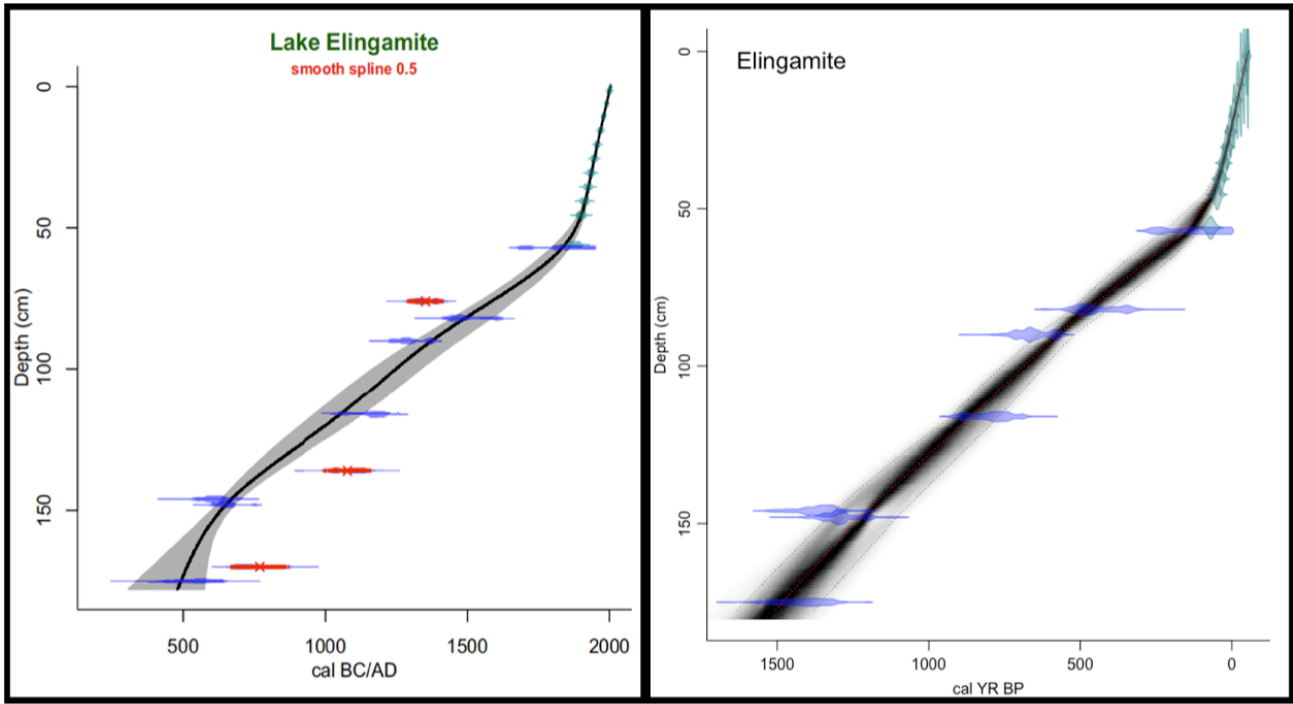

Supplement: Supplementary file 1 [file cp-2017-31-supplement.pdf]
